# Supplementary material for: Filopodia powered by class x myosin promote fusion of mammalian myoblasts
Source: PubMed Central journal article supplement (PMC8500716; doi:10.7554/elife.72419), 2021-09-14

Fig S6C- Muscle fiber diameter

| Muscle #1 |         | Muscle #2 |         |        |        | Muscle #3 |        |        |        | Muscle #4 |        |        |         | Muscle #5 |        |        |        | Muscle #1 |        |        |        | Musc   |        |        |        |
|-----------|---------|-----------|---------|--------|--------|-----------|--------|--------|--------|-----------|--------|--------|---------|-----------|--------|--------|--------|-----------|--------|--------|--------|--------|--------|--------|--------|
| 10.661    | 39.837  | 33.495    | 11.224  | 46.213 | 25.056 | 31.464    | 25.132 | 18.882 | 43.466 | 58.335    | 27.778 | 28.745 | 62.364  | 72.433    | 34.811 | 58.04  | 48.513 | 42.38     | 51.039 | 10.661 | 63.539 | 43.339 | 36.738 | 49.854 | 44.86  |
| 35.714    | 102.549 | 52.263    | 17.196  | 49.122 | 23.848 | 32.29     | 20.949 | 43.534 | 14.973 | 33.069    | 18.707 | 39.131 | 35.056  | 85.665    | 37.037 | 60.272 | 67.697 | 44.896    | 37.651 | 35.714 | 87.319 | 22.432 | 63.714 | 23.992 | 17.948 |
| 18.997    | 97.123  | 55.413    | 82.771  | 23.281 | 48.132 | 60.798    | 14.212 | 17.196 | 19.425 | 56.078    | 27.764 | 10.045 | 60.684  | 92.509    | 31.46  | 53.868 | 66.037 | 46.232    | 36.159 | 18.997 | 35.873 | 23.058 | 53.215 | 23.859 | 21.84  |
| 38.36     | 34.936  | 62.589    | 40.601  | 88.136 | 11.905 | 19.841    | 18.519 | 25.132 | 14.55  | 42.438    | 59.411 | 15.329 | 43.025  | 17.151    | 51.258 | 34.574 | 33.069 | 42.754    | 46.13  | 38.36  | 13.434 | 52.91  | 34.714 | 11.789 | 42.981 |
| 15.402    | 40.441  | 69.731    | 21.164  | 31.801 | 46.607 | 35.714    | 37.67  | 22.189 | 48.173 | 44.896    | 28.236 | 17.459 | 67.986  | 50.785    | 61.646 | 21.564 | 11.81  | 42.064    | 47.311 | 15.402 | 28.159 | 7.067  | 36.692 | 20.957 | 38.36  |
| 22.487    | 28.278  | 26.177    | 29.272  | 28.807 | 18.214 | 16.613    | 23.81  | 31.746 | 34.392 | 46.296    | 14.031 | 38.191 | 78.01   | 14.55     | 24.705 | 20.427 | 10.06  | 60.09     | 58.072 | 22.487 | 12.982 | 18.022 | 39.586 | 26.124 | 20.845 |
| 13.095    | 71.649  | 78.298    | 103.216 | 21.448 | 15.873 | 17.328    | 16.482 | 24.212 | 32.361 | 76.072    | 43.651 | 29.845 | 23.878  | 11.905    | 42.005 | 18.47  | 20.088 | 9.693     | 41.887 | 13.095 | 23.175 | 53.25  | 17.617 | 35.238 | 14.205 |
| 8.418     | 38.244  | 79.262    | 41.913  | 20.055 | 12.973 | 36.68     | 15.616 | 27.778 | 33.909 | 10.663    | 45.418 | 80.987 | 61.701  | 63.055    | 51.755 | 36.114 | 57.594 | 16.107    | 33.084 | 8.418  | 15.722 | 48.044 | 37.03  | 93.508 | 13.779 |
| 12.842    | 25.791  | 61.546    | 64.046  | 19.222 | 37.44  | 35.542    | 38.36  | 49.283 | 85.981 | 17.028    | 36.183 | 37.609 | 70.149  | 54.431    | 52.801 | 35.62  | 43.935 | 42.327    | 51.587 | 12.842 | 37.878 | 19.665 | 39.309 | 14.69  | 21.733 |
| 25.254    | 56.094  | 72.751    | 87.439  | 45.397 | 22.035 | 21.433    | 20.957 | 28.06  | 25.132 | 38.28     | 7.393  | 62.916 | 48.597  | 26.455    | 26.292 | 91.226 | 80.688 | 31.801    | 69.155 | 25.254 | 9.865  | 19.841 | 22.386 | 34.241 | 59.77  |
| 18.588    | 50.076  | 55.252    | 34.979  | 47.418 | 43.738 | 23.408    | 34.045 | 53.192 | 40.026 | 54.233    | 24.143 | 53.618 | 17.76   | 33.069    | 39.683 | 18.603 | 48.942 | 47.988    | 29.101 | 18.588 | 14.55  | 22.487 | 23.742 | 29.973 | 33.693 |
| 10.582    | 32.888  | 72.287    | 26.189  | 24.432 | 16.743 | 26.892    | 57.673 | 30.959 | 47.619 | 65.11     | 36.568 | 33.638 | 30.278  | 60.796    | 64.092 | 43.188 | 48.942 | 44.896    | 58.389 | 10.582 | 33.668 | 23.81  | 49.556 | 23.99  | 23.81  |
| 34.527    | 92.55   | 36.309    | 31.801  | 32.285 | 39.683 | 27.699    | 18.707 | 34.588 | 66.437 | 42.626    | 19.707 | 29.93  | 58.595  | 75.182    | 18.068 | 13.015 | 14.643 | 36.478    | 14.681 | 34.527 | 10.601 | 17.196 | 36.678 | 19.841 | 35.761 |
| 19.532    | 27.124  | 14.681    | 68.968  | 10.884 | 29.101 | 10.874    | 26.461 | 40.845 | 24.859 | 42.532    | 37.063 | 28.933 | 51.587  | 26.809    | 91.207 | 31.125 | 32.599 | 50.265    | 33.069 | 19.532 | 23.837 | 32.123 | 14.505 | 29.101 | 14.965 |
| 32.909    | 37.037  | 77.4      | 14.785  | 25.132 | 14.031 | 24.318    | 19.154 | 39.399 | 35.126 | 45.841    | 30.423 | 38.569 | 59.159  | 58.988    | 37.888 | 56.274 | 54.206 | 72.205    | 55.556 | 32.909 | 11.241 | 12.835 | 72.022 | 31.336 | 28.803 |
| 37.764    | 46.982  | 48.152    | 51.896  | 45.006 | 9.259  | 27.778    | 26.843 | 32.012 | 34.788 | 16.854    | 60.823 | 21.164 | 38.83   | 52.585    | 54.233 | 13.393 | 52.428 | 25.017    | 44.974 | 37.764 | 11.224 | 19.581 | 51.529 | 62.767 | 15.901 |
| 31.956    | 36.725  | 63.98     | 72.156  | 33.337 | 14.55  | 17.168    | 27.593 | 19.185 | 10.215 | 46.751    | 20.389 | 43.724 | 32.197  | 47.499    | 66.138 | 32.402 | 19.16  | 46.296    | 16.368 | 31.956 | 14.55  | 37.54  | 26.627 | 17.196 | 37.037 |
| 15.382    | 56.399  | 73.494    | 28.859  | 41.005 | 14.409 | 13.099    | 18.508 | 60.577 | 49.08  | 30.423    | 29.145 | 34.33  | 81.497  | 33.069    | 77.982 | 49.046 | 18.519 | 66.196    | 28.443 | 15.382 | 15.873 | 29.759 | 40.228 | 18.707 | 28.06  |
| 10.067    | 47.451  | 40.076    | 61.222  | 37.008 | 13.949 | 9.585     | 23.455 | 30.197 | 20.731 | 36.103    | 28.06  | 35.736 | 78.004  | 53.571    | 56.242 | 8.372  | 63.249 | 45.629    | 39.683 | 10.067 | 30.428 | 19.572 | 27.02  | 9.259  | 66.489 |
| 24.586    | 13.018  | 19.01     | 13.402  | 27.766 | 32.083 | 8.795     | 67.018 | 17.447 | 23.276 | 62.886    | 39.442 | 70.847 | 30.423  | 55.392    | 49.93  | 28.995 | 60.83  | 71.792    | 43.55  | 24.586 | 17.202 | 13.228 | 37.314 | 40.412 | 38.88  |
| 23.298    | 76.638  | 27.81     | 42.242  | 31.408 | 50.598 | 17.204    | 33.717 | 37.607 | 27.232 | 25.777    | 27.768 | 23.363 | 79.862  | 89.393    | 85.48  | 20.95  | 34.878 | 21.914    | 19.946 | 29.101 | 23.416 | 15.673 | 36.705 | 10.497 | 24.683 |
| 29.101    | 49.958  | 24.888    | 23.333  | 25.194 | 8.532  | 24.219    | 30.423 | 30.701 | 38.037 | 35.367    | 20.632 | 53.551 | 25.254  | 43.693    | 14.03  | 37.024 | 11.224 | 12.457    | 10.111 | 13.704 | 46.296 | 10.289 | 19.841 | 47.367 | 53.947 |
| 13.704    | 43.222  | 43.304    | 70.665  | 48.094 | 40.529 | 74.408    | 40.687 | 47.349 | 19.022 | 39.461    | 26.455 | 31.135 | 49.237  | 40.754    | 63.583 | 17.017 | 18.519 | 45.468    | 25.132 | 41.005 | 18.431 | 46.144 | 24.886 | 23.81  | 59.369 |
| 41.005    | 66.203  | 42.328    | 64.297  | 20.351 | 21.316 | 51.335    | 28.995 | 15.202 | 33.069 | 49.958    | 30.622 | 69.876 | 109.878 | 100.619   | 71.408 | 24.958 | 51.587 | 51.364    | 17.892 | 15.733 | 23.075 | 27.678 | 50.475 | 17.771 | 56.592 |
| 15.733    | 59.341  | 61.961    | 15.427  | 36.618 | 40.219 | 18.519    | 20.509 | 33.672 | 26.676 | 56.598    | 70.709 | 53.566 | 58.743  | 19.581    | 55.861 | 36.966 | 25.132 | 35.939    | 40.622 | 40.058 | 20.871 | 22.487 | 19.841 | 41.639 | 46.237 |
| 40.058    | 30.107  | 12.159    | 77.663  | 37.294 | 22.233 | 21.028    | 30.018 | 31.746 | 51.486 | 38.334    | 36.049 | 36.548 | 47.619  | 59.825    | 22.487 | 14.03  | 27.778 | 48.96     | 27.778 | 47.491 | 30.782 | 28.36  | 33.047 | 20.257 | 66.69  |
| 47.491    | 37.886  | 29.288    | 86.633  | 53.202 | 34.186 | 22.233    | 27.506 | 17.338 | 52.551 | 37.931    | 37.27  | 87.306 | 103.507 | 35.714    | 26.056 | 15.873 | 64.475 | 64.487    | 44.076 | 19.025 | 53.786 | 16.862 | 17.022 | 10.654 | 79.461 |
| 19.025    | 77.426  | 46.122    | 56.513  | 37.189 | 39.173 | 58.33     | 32.299 | 23.446 | 41.005 | 14.091    | 23.281 | 33.508 | 73.011  | 52.351    | 54.003 | 21.412 | 26.068 | 14.55     | 78.042 | 20.922 | 11.905 | 23.025 | 48.525 | 34.769 | 17.174 |
| 20.922    | 44.94   | 62.938    | 62.369  | 45.33  | 11.905 | 11.905    | 15.402 | 42.328 | 18.603 | 44.918    | 35.482 | 5.29   | 44.831  | 59.764    | 29.196 | 35.116 | 24.843 | 63.779    | 39.683 | 13.646 | 23.676 | 18.681 | 54.681 | 59.186 | 66.105 |
| 13.646    | 53.552  | 77.875    | 12.385  | 61.53  | 39.614 | 41.839    | 40.033 | 30.381 | 12.603 | 28.404    | 18.707 | 51.321 | 32.502  | 46.799    | 38.718 | 36.478 | 44.891 | 54.517    | 16.58  | 38.915 | 15.386 | 31.191 | 22.467 | 17.958 | 82.775 |
| 38.915    | 64.537  | 71.085    | 11.905  | 32.736 | 36.684 | 30.423    | 22.759 | 17.017 | 47.619 | 33.576    | 20.968 | 26.189 | 47.985  | 63.492    | 38.469 | 34.143 | 16.728 | 58.313    | 34.449 | 35.542 | 14.55  | 14.55  | 30.423 | 16.672 | 34.913 |
| 35.542    | 44.442  | 31.771    | 16.747  | 39.447 | 39.071 | 15.873    | 12.49  | 29.881 | 36.271 | 23.531    | 43.516 | 54.387 | 27.023  | 17.196    | 21.164 | 27.778 | 70.028 | 46.164    | 22.435 | 19.841 | 11.343 | 17.196 | 22.877 | 15.6   | 45.409 |
| 19.841    | 15.983  | 53.178    | 25.545  | 22.487 | 14.774 | 20.577    | 15.386 | 50.617 | 30.866 | 60.25     | 50.607 | 21.639 | 18.62   | 40.219    | 9.259  | 41.099 | 25.132 | 24.98     | 68.054 | 37.973 | 21.164 | 19.829 | 30.591 | 8.303  | 33.057 |
| 37.973    | 82.007  | 23.474    | 30.339  | 47.476 | 23.635 | 20.881    | 18.636 | 33.068 | 25.132 | 46.005    | 24.687 | 44.974 | 40.016  | 55.184    | 42.236 | 56.878 | 56.339 | 39.621    | 52.633 | 27.77  | 26.04  | 11.7   | 31.187 | 30.662 | 36.043 |
| 27.77     | 59.61   | 17.156    | 57.919  | 42.055 | 7.932  | 43.063    | 35.147 | 11.016 | 25.132 | 25.773    | 36.772 | 56.811 | 47.047  | 44.974    | 9.259  | 27.755 | 33.354 | 37.264    | 18.519 | 18.94  | 34.645 | 35.926 | 18.94  | 14.459 | 44.37  |
| 18.94     | 106.666 | 66.869    | 51.958  | 34.392 | 12.311 | 12.428    | 34.313 | 22.828 | 37.465 | 23.083    | 24.318 | 52.006 | 53.138  | 65.526    | 23.224 | 52.939 | 28.397 | 29.763    | 33.331 | 11.572 | 11.905 | 16.654 | 37.949 | 11.905 | 53.87  |
| 11.572    | 46.296  | 47.594    | 57.972  | 21.26  | 71.353 | 14.798    | 11.248 | 11.427 | 32.877 | 36.897    | 43.413 | 69.199 | 11.209  | 43.192    | 29.001 | 44.566 | 38.817 | 14.681    | 22.487 | 18.264 | 33.069 | 13.228 | 74.554 | 24.895 | 10.592 |
| 18.264    | 38.36   | 13.696    | 45.888  | 31.257 | 41.313 | 17.196    | 36.795 | 61.429 | 27.967 | 48.221    | 33.609 | 57.053 | 89.089  | 18.309    | 42.328 | 40.476 | 11.838 | 14.55     | 44.58  | 31.746 | 54.448 | 26.999 | 67.451 | 19.121 | 14.017 |
| 31.746    | 55.556  | 31.746    | 23.676  | 16.836 | 40.554 | 28.995    | 17.572 | 37.037 | 50.508 | 40.691    | 19.895 | 59.053 | 30.971  | 65.125    | 83.153 | 35.312 | 34.352 | 24.93     | 34.392 | 9.259  | 20.249 | 17.196 | 55.622 | 13.025 | 22.487 |
| 9.259     | 37.537  | 78.843    | 70.567  | 25.622 | 42.027 | 24.682    | 76.957 | 28.887 | 36.176 | 31.924    | 32.051 | 14.965 | 15.873  | 33.98     | 11.905 | 64.578 | 52.91  | 46.335    | 53.442 | 12.475 | 40.626 | 26.956 | 49.603 | 21.553 |        |
| 53.442    | 36.015  | 48.187    | 67.638  | 27.455 | 27.807 | 28.427    | 14.333 | 25.188 | 18.378 | 28.184    | 44.886 | 62.816 | 19.841  | 35.542    | 68.512 | 52.285 | 43.746 | 62.326    | 20.711 | 9.353  | 23.008 | 22.927 | 30.866 | 15.331 | 53.179 |
| 9.353     | 70.593  | 45.196    | 26.478  | 21.639 | 28.753 | 9.259     | 23.346 | 23.09  | 27.506 | 48.942    | 59.331 | 33.048 | 60.796  | 56.878    | 79.387 | 35.638 | 13.242 | 35.004    | 40.829 | 35.873 | 47.619 | 11.375 | 21.743 | 19.841 | 48.084 |
| 35.873    | 49.906  | 45.967    | 41.576  | 67.744 | 47.691 | 46.296    |        |        |        |           |        |        |         |           |        |        |        |           |        |        |        |        |        |        |        |

|        |        |        |        |        |        |        |        |        |        |        |        |        |        |        |        |        |        |        |        |        |        |        |        |        |        |
|--------|--------|--------|--------|--------|--------|--------|--------|--------|--------|--------|--------|--------|--------|--------|--------|--------|--------|--------|--------|--------|--------|--------|--------|--------|--------|
| 10.388 | 54.497 | 23.81  | 20.908 | 40.832 | 34.261 | 12.431 | 38.204 | 44.896 | 55.038 | 22.029 | 32.287 | 27.356 | 98.622 | 81.949 | 10.02  | 34.91  | 33.679 | 32.603 | 23.684 | 16.573 | 24.209 | 7.906  | 16.092 | 19.816 | 46.92  |
| 11.834 | 26.651 | 38.36  | 48.445 | 54.367 | 13.228 | 40.439 | 11.851 | 15.582 | 22.487 | 81.34  | 44.083 | 58.482 | 61.59  | 9.259  | 21.965 | 12.848 | 60.936 | 19.06  | 45.769 | 23.151 | 51.615 | 11.241 | 33.337 | 19.841 | 60.517 |
| 16.573 | 43.651 | 22.321 | 51.921 | 38.121 | 21.023 | 14.21  | 24.28  | 34.303 | 26.493 | 55.268 | 19.403 | 28.707 | 34.527 | 7.937  | 46.317 | 12.968 | 17.557 | 51.587 | 24.256 | 15.354 | 17.18  | 44.767 | 41.183 | 33.069 | 36.694 |
| 23.151 | 42.328 | 50.265 | 55.81  | 24.849 | 22.452 | 16.836 | 14.03  | 10.295 | 26.313 | 47.34  | 30.575 | 61.748 | 51.776 | 73.078 | 15.062 | 12.484 | 45.558 | 38.157 | 14.965 | 14.756 | 41.616 | 18.519 | 15.784 | 32.015 | 12.263 |
| 15.354 | 38.74  | 32.736 | 82.999 | 40.286 | 24.211 | 59.712 | 40.026 | 70.106 | 9.429  | 36.226 | 18.524 | 39.745 | 52.378 | 15.062 | 30.53  | 92.748 | 39.683 | 12.622 | 55.277 | 20.599 | 30.423 | 50.508 | 17.777 | 47.241 | 26.623 |
| 20.177 | 21.164 | 41.682 | 48.933 | 57.581 | 17.196 | 19.874 | 42.41  | 23.553 | 18.555 | 19.841 | 23.736 | 50.771 | 13.806 | 93.736 | 21.164 | 65.737 | 57.806 | 72.78  | 40.73  | 15.611 | 14.138 | 21.763 | 43.087 | 32.235 | 13.095 |
| 31.952 | 53.505 | 67.956 | 28.26  | 35.692 | 22.459 | 19.854 | 23.383 | 33.901 | 16.966 | 19.841 | 36.637 | 40.514 | 34.733 | 48.986 | 68.535 | 45.081 | 23.77  | 48.463 | 41.005 | 18.519 | 17.017 | 25.69  | 55.688 | 50.571 | 10.524 |
| 14.756 | 62.896 | 56.263 | 18.707 | 60.546 | 20.2   | 13.02  | 20.461 | 21.225 | 43.172 | 37.814 | 34.973 | 46.679 | 80.311 | 46.953 | 27.124 | 37.179 | 35.714 | 55.133 | 21.142 | 25.517 | 24.705 | 25.132 | 10.14  | 19.841 | 17.196 |
| 20.599 | 46.909 | 71.938 | 27.826 | 42.311 | 29.265 | 16.216 | 13.702 | 19.362 | 25.254 | 46.902 | 11.905 | 53.776 | 78.354 | 63.424 | 41.005 | 17.196 | 63.602 | 14.118 | 38.197 | 17.191 | 42.692 | 12.61  | 25.449 | 21.997 | 18.207 |
| 15.611 | 54.666 | 28.878 | 16.225 | 24.695 | 66.02  | 17.626 | 19.908 | 27.81  | 13.228 | 54.074 | 51.951 | 62.232 | 29.851 | 51.254 | 65.231 | 27.593 | 29.93  | 18.519 | 55.907 | 17.47  | 25.8   | 33.069 | 38.381 | 30.561 | 20.121 |
| 18.519 | 46.12  | 60.876 | 14.541 | 34.53  | 30.768 | 20.042 | 11.235 | 47.597 | 22.113 | 22.59  | 50.723 | 18.167 | 78.689 | 38.18  | 39.362 | 28.744 | 22.487 | 23.041 | 52.472 | 20.555 | 13.856 | 16.745 | 38.948 | 25.106 | 45.468 |
| 25.517 | 42.566 | 18.815 | 31.664 | 44.064 | 63.512 | 59.259 | 47.209 | 32.865 | 27.438 | 32.116 | 55.192 | 40.847 | 64.811 | 60.214 | 39.89  | 22.361 | 47.702 | 57.749 | 73.275 | 31.549 | 27.916 | 23.008 | 31.408 | 19.465 | 15.976 |
| 17.191 | 60.145 | 52.505 | 47.784 | 34.415 | 54.323 | 24.391 | 63.802 | 9.259  | 33.793 | 34.207 | 50.891 | 49.055 | 15.163 | 19.152 | 65.118 | 46.763 | 65.54  | 45.997 | 15.784 | 19.601 | 25.805 | 30.423 | 22.639 | 26.64  | 18.677 |
| 17.47  | 82.211 | 66.931 | 60.458 | 24.266 | 40.929 | 14.55  | 23.692 | 39.645 | 41.717 | 52.618 | 45.241 | 50.719 | 50.831 | 49.332 | 18.897 | 22.487 | 57.241 | 52.91  | 31.746 | 41.005 | 39.683 | 11.421 | 51.869 | 46.176 | 59.372 |
| 20.555 | 13.808 | 36.004 | 79.442 | 29.362 | 32.828 | 18.72  | 25.132 | 39.724 | 38.516 | 14.55  | 19.35  | 65.963 | 25.554 | 17.005 | 67.588 | 17.869 | 57.03  | 26.189 | 40.998 | 14.55  | 11.905 | 32.633 | 79.666 | 28.646 | 21.926 |
| 31.549 | 48.96  | 36.607 | 36.264 | 56.878 | 44.974 | 25.245 | 13.27  | 23.578 | 60.847 | 43.923 | 26.508 | 73.227 | 24.906 | 38.857 | 20.639 | 42.201 | 51.587 | 45.195 | 13.258 | 18.006 | 13.228 | 19.966 | 49.496 | 14.799 | 26.627 |
| 19.601 | 47.587 | 34.607 | 57.742 | 42.328 | 31.746 | 56.264 | 11.336 | 41.005 | 33.909 | 12.391 | 30.449 | 66.639 | 30.423 | 37.037 | 11.592 | 65.29  | 40.376 | 41.834 | 13.095 | 16.747 | 12.134 | 27.958 | 27.787 | 9.793  | 31.374 |
| 41.005 | 33.168 | 77.337 | 77.404 | 67.146 | 32.736 | 68.328 | 26.455 | 19.783 | 12.159 | 58.926 | 59.342 | 60.394 | 23.241 | 8.808  | 68.181 | 54.941 | 33.596 | 23.841 | 36.478 | 17.196 | 33.069 | 29.626 | 62.169 | 13.615 | 16.84  |
| 14.55  | 15.442 | 36.448 | 35.453 | 36.384 | 23.275 | 35.552 | 67.643 | 26.711 | 36.39  | 27.333 | 12.159 | 43.903 | 57.99  | 14.765 | 94.495 | 29.101 | 69.813 | 43.012 | 43.651 | 12.117 | 15.062 | 41.137 | 18.864 | 22.686 | 53.009 |
| 18.006 | 77.303 | 86.657 | 19.648 | 17.648 | 19.7   | 10.695 | 10.884 | 38.14  | 26.944 | 24.293 | 56.961 | 38.597 | 70.328 | 75.051 | 47.619 | 43.098 | 27.523 | 46.477 | 52.674 | 19.841 | 10.582 | 9.741  | 31.314 | 39.683 | 16.747 |
| 16.747 | 25.777 | 32.943 | 70.149 | 42.606 | 45.603 | 52.91  | 35.551 | 19.747 | 72.336 | 13.776 | 42.606 | 41.876 | 88.655 | 40.924 | 51.935 | 13.388 | 46.384 | 61.082 | 56.46  | 29.377 | 11.241 | 9.304  | 34.112 | 19.506 | 67.965 |
| 17.196 | 26.591 | 18.519 | 76.624 | 18.347 | 22.487 | 22.716 | 20.08  | 57.181 | 19.841 | 40.38  | 23.354 | 56.829 | 32.088 | 39.363 | 36.834 | 34.043 | 45.129 | 10.128 | 25.946 | 43.025 | 15.482 | 20.684 | 26.189 | 11.905 | 15.873 |
| 12.117 | 23.672 | 79.241 | 29.626 | 17.729 | 52.593 | 12.835 | 15.901 | 28.601 | 32.077 | 37.134 | 39.665 | 42.891 | 62.169 | 48.404 | 31.235 | 31.693 | 37.746 | 46.605 | 16.144 | 23.618 | 27.805 | 25.527 | 35.409 | 9.477  | 32.526 |
| 19.841 | 40.839 | 49.609 | 62.79  | 32.79  | 43.027 | 25.446 | 47.602 | 34.294 | 27.778 | 37.914 | 43.96  | 49.609 | 69.632 | 37.107 | 30.281 | 41.141 | 69.684 | 12.246 | 65.726 | 29.484 | 15.661 | 11.995 | 62.294 | 19.29  | 42.649 |
| 29.377 | 28.976 | 70.102 | 59.22  | 58.468 | 39.07  | 26.093 | 32.758 | 22.759 | 15.601 | 53.028 | 68.505 | 62.704 | 14.745 | 80.688 | 69.833 | 50.295 | 22.417 | 61.436 | 20.785 | 20.353 | 34.133 | 50.552 | 29.746 | 15.875 | 23.276 |
| 43.025 | 22.015 | 12.676 | 27.202 | 27.437 | 13.753 | 37.277 | 33.888 | 35.551 | 49.46  | 32.706 | 19.642 | 61.732 | 57.314 | 75.397 | 63.919 | 56.509 | 48.779 | 59.474 | 41.081 | 35.542 | 62.169 | 24.886 | 17.333 | 42.921 | 29.127 |
| 23.618 | 17.163 | 47.107 | 79.187 | 66.096 | 27.418 | 30.192 | 47.013 | 24.261 | 25.132 | 37.5   | 26.455 | 73.909 | 75.656 | 13.8   | 71.383 | 62.855 | 37.881 | 60.548 | 35.083 | 14.118 | 12.159 | 66.138 | 25.254 | 18.717 | 32.928 |
| 29.484 | 14.844 | 22.989 | 14.55  | 21.164 | 22.225 | 49.543 | 22.487 | 25.277 | 14.685 | 21.477 | 26.448 | 81.992 | 32.874 | 54.532 | 12.614 | 39.184 | 48.115 | 19.298 | 57.888 | 17.196 | 72.644 | 38.36  | 33.48  | 17.196 | 19.572 |
| 20.353 | 49.558 | 66.72  | 93.262 | 27.124 | 16.744 | 44.295 | 43.407 | 26.455 | 40.905 | 26.292 | 12.848 | 30.16  | 54.233 | 69.761 | 32.013 | 13.701 | 43.651 | 59.059 | 36.236 | 27.778 | 19.632 | 34.656 | 13.388 | 30.708 | 14.978 |
| 35.542 | 57.68  | 28.302 | 72.065 | 39.214 | 32.736 | 40.697 | 11.905 | 13.13  | 31.746 | 10.229 | 36.826 | 56.616 | 36.253 | 46.272 | 71.718 | 15.873 | 57.83  | 40.708 | 29.768 | 32.435 | 9.259  | 31.346 | 26.82  | 41.071 | 25.942 |
| 14.118 | 59.345 | 57.121 | 23.489 | 33.768 | 8.313  | 11.819 | 29.645 | 13.228 | 25.937 | 33.857 | 21.848 | 54.249 | 64.744 | 21.164 | 26.641 | 16.002 | 54.067 | 22.915 | 17.196 | 35.25  | 8.9    | 20.683 | 40.944 | 31.852 | 18.519 |
| 17.196 | 36.97  | 50.808 | 46.296 | 26.776 | 27.349 | 39.586 | 37.76  | 22.174 | 44.01  | 26.189 | 35.249 | 25.121 | 48.46  | 51.044 | 71.188 | 62.474 | 62.419 | 46.452 | 22.448 | 22.893 | 19.841 | 42.583 | 29.133 | 10.15  | 27.741 |
| 27.778 | 25.434 | 37.02  | 55.971 | 21.739 | 9.47   | 17.017 | 22.047 | 28.407 | 41.005 | 17.246 | 34.607 | 42.09  | 58.16  | 29.98  | 22.487 | 34.226 | 59.485 | 14.092 | 16.849 | 18.519 | 22.485 | 50.541 | 66.172 | 14.459 | 17.015 |
| 32.435 | 26.774 | 38.148 | 25.113 | 32.85  | 17.558 | 25.94  | 27.778 | 45.517 | 14.092 | 61.66  | 46.067 | 37.207 | 84.312 | 42.699 | 12.323 | 72.751 | 13.775 | 22.842 | 63.492 | 32.57  | 34.253 | 11.424 | 67.061 | 26.455 | 10.551 |
| 35.25  | 21.969 | 82.165 | 41.3   | 15.267 | 7.956  | 11.905 | 48.513 | 16.914 | 13.099 | 30.348 | 30.799 | 34.105 | 47.859 | 10.289 | 26.065 | 19.776 | 20.195 | 20.18  | 73.227 | 35.135 | 11.905 | 11.924 | 8.223  | 18.519 | 46.79  |
| 22.893 | 51.858 | 60.258 | 62.143 | 11.926 | 47.607 | 50.186 | 11.508 | 36.5   | 33.384 | 27.844 | 39.561 | 62.243 | 53.069 | 48.817 | 47.271 | 9.1    | 42.718 | 52.479 | 19.298 | 27.817 | 24.749 | 38.699 | 23.025 | 41.084 | 38.109 |
| 18.519 | 72.312 | 39.063 | 82.834 | 14.745 | 81.29  | 14.281 | 40.621 | 28.022 | 20.684 | 25.705 | 33.084 | 55.592 | 58.705 | 32.185 | 72.723 | 33.866 | 43.072 | 42.495 | 56.465 | 31.746 | 26.455 | 17.975 | 9.353  | 24.853 | 31.746 |
| 32.57  | 59.132 | 19.841 | 91.247 | 15.237 | 26.455 | 19.082 | 17.763 | 20.559 | 16.829 | 46.663 | 47.881 | 45.473 | 35.272 | 85.115 | 16.519 | 25.132 | 60.017 | 58.572 | 47.866 | 39.617 | 20.752 | 17.744 | 18.333 | 19.657 | 52.91  |
| 35.135 | 59.171 | 13.228 | 91.334 | 9.259  | 52.216 | 17.208 | 15.834 | 41.521 | 24.028 | 51.359 | 50.479 | 19.672 | 18.164 | 60.055 | 45.255 | 23.997 | 49.944 | 34.515 | 26.711 | 8.28   | 17.196 | 25.414 | 36.735 | 7.606  | 48.787 |
| 27.817 | 28.265 | 58.798 | 24.212 | 55.03  | 15.985 | 46.157 | 21.063 | 21.025 | 13.228 | 16.672 | 13.155 | 44.974 | 72.888 | 79.095 | 16.317 | 10.582 | 18.707 | 73.464 | 40.395 | 23.27  | 32.532 | 40.027 | 52.661 | 40.635 | 50.55  |
| 31.746 | 96.046 | 17.196 | 22.962 | 36.951 | 16.365 | 10.724 | 15.661 | 55.734 | 29.406 | 20.613 | 16.135 | 57.053 | 60.365 | 40.539 | 59.518 | 67.738 | 33.366 | 56.359 | 70.045 | 24.859 | 15.219 | 19.215 | 27.138 | 39.224 | 21.049 |
| 39.617 | 72.729 | 53.176 | 78.578 | 41.412 | 30.258 | 23.584 | 18.472 | 21.105 | 7.393  | 22.727 | 63.916 | 52.303 | 14.738 | 9.259  | 48.178 | 52.501 | 80.65  | 42.284 | 49.886 | 31.197 | 17.196 | 19.841 | 44.352 | 17.938 | 27.46  |
| 8.28   | 54.2   | 63.492 | 83.478 | 47.953 | 47.982 | 42.05  | 40.437 | 55.556 | 48.245 | 21.794 | 35.323 | 57.304 | 97.695 | 59.613 | 33.132 | 43.025 | 62.659 | 65.257 | 23.894 | 50.494 | 18.519 | 21.513 | 15.623 | 3      |        |

|        |        |         |        |        |        |        |        |        |        |        |        |        |         |        |        |        |        |        |        |        |        |        |        |        |        |
|--------|--------|---------|--------|--------|--------|--------|--------|--------|--------|--------|--------|--------|---------|--------|--------|--------|--------|--------|--------|--------|--------|--------|--------|--------|--------|
| 60.473 | 29.648 | 26.285  | 20.076 | 37.085 | 31.746 | 34.894 | 14.55  | 30.423 | 20.708 | 38.314 | 13.228 | 51.967 | 44.145  | 15.873 | 41.005 | 63.616 | 27.778 | 66.087 | 12.552 | 17.196 | 22.487 | 11.555 | 44.904 | 13.515 | 48.723 |
| 34.731 | 35.275 | 60.534  | 88.856 | 38.919 | 27.778 | 39.683 | 33.069 | 24.424 | 54.233 | 21.026 | 21.926 | 45.36  | 62.089  | 59.165 | 13.228 | 36.602 | 17.698 | 15.799 | 36.861 | 15.794 | 15.873 | 29.101 | 23.467 | 51.538 | 50.001 |
| 52.751 | 87.774 | 21.142  | 57.665 | 17.156 | 14.55  | 50.508 | 18.354 | 30.771 | 21.164 | 59.524 | 34.326 | 62.169 | 80.01   | 63.453 | 49.023 | 21.305 | 31.379 | 57.423 | 29.101 | 47.346 | 32.888 | 23.498 | 40.434 | 16.593 | 59.012 |
| 25.812 | 75.254 | 23.684  | 83.164 | 30.359 | 14.742 | 31.119 | 28.633 | 17.196 | 64.215 | 35.233 | 50.739 | 46.437 | 38.017  | 37.037 | 68.425 | 32.619 | 62.358 | 32.552 | 53.988 | 47.921 | 56.86  | 33.974 | 26.796 | 9.259  | 76.534 |
| 30.976 | 41.971 | 83.244  | 26.534 | 57.772 | 97.952 | 51.39  | 25.221 | 31.905 | 34.15  | 32.88  | 31.762 | 63.958 | 66.849  | 79.755 | 62.94  | 32.389 | 61.386 | 13.228 | 52.702 | 39.437 | 25.132 | 26.455 | 20.128 | 26     | 29.516 |
| 17.196 | 14.93  | 60.118  | 36.624 | 29.744 | 62.148 | 48.019 | 12.869 | 18.707 | 48.106 | 44.877 | 53.333 | 38.469 | 25.509  | 45.621 | 18     | 46.352 | 31.945 | 31.372 | 34.971 | 8.763  | 24.797 | 30.423 | 72.2   | 60.311 | 38.866 |
| 15.794 | 80.06  | 42.062  | 78.968 | 45.712 | 31.746 | 47.239 | 17.571 | 21.164 | 13.414 | 29.84  | 28.417 | 62.155 | 53.696  | 28.745 | 22.735 | 54.069 | 54.886 | 14.398 | 41.912 | 14.55  | 22.487 | 18.707 | 19.224 | 40.452 | 74.035 |
| 47.346 | 61.785 | 43.562  | 13.608 | 46.203 | 30.623 | 11.224 | 49.3   | 50.09  | 29.545 | 32.648 | 37.715 | 65.156 | 27.201  | 33.218 | 45.575 | 40.366 | 19.841 | 61.761 | 44.78  | 19.532 | 12.21  | 35.145 | 22.786 | 12.311 | 74.475 |
| 47.921 | 36.966 | 63.166  | 68.783 | 29.987 | 43.544 | 13.095 | 23.383 | 45.428 | 35.97  | 37.986 | 34.801 | 36.471 | 28.854  | 22.115 | 15.442 | 23.81  | 23.669 | 22.749 | 14.202 | 39.657 | 46.296 | 17.166 | 44.896 | 68.194 | 40.084 |
| 39.437 | 23.676 | 63.13   | 43.466 | 28.753 | 22.24  | 47.368 | 7.937  | 41.928 | 40.368 | 18.078 | 32.327 | 67.224 | 83.636  | 56.284 | 62.912 | 10.46  | 47.065 | 26.734 | 61.659 | 19.167 | 13.608 | 18.519 | 24.565 | 42.556 | 43.914 |
| 8.763  | 17.571 | 20.015  | 17.518 | 43.473 | 19.624 | 40.401 | 20.577 | 55.017 | 43.455 | 35.495 | 40.936 | 49.835 | 32.629  | 17.196 | 31.282 | 44.825 | 60.183 | 14.469 | 42.777 | 30.423 | 15.873 | 23.81  | 29.785 | 25.132 | 25.132 |
| 14.55  | 29.101 | 31.285  | 54.663 | 29.101 | 23.018 | 34.264 | 11.551 | 65.437 | 35.557 | 28.852 | 35.042 | 26.83  | 34.718  | 97.543 | 58.566 | 41.861 | 46.199 | 37.631 | 32.908 | 20.911 | 33.069 | 19.251 | 66.327 | 32.648 | 35.766 |
| 19.532 | 36.781 | 23.864  | 94.423 | 37.861 | 39.963 | 15.897 | 18.43  | 40.906 | 20.637 | 23.679 | 66.851 | 50.095 | 24.682  | 70.84  | 69.639 | 31.417 | 55.558 | 45.382 | 48.097 | 18.84  | 59.611 | 15.386 | 17.977 | 22.487 | 19.648 |
| 39.657 | 48.469 | 52.521  | 24.635 | 45.83  | 42.511 | 19.841 | 34.264 | 51.212 | 42.566 | 27.22  | 17.699 | 36.961 | 76.987  | 22.487 | 65.473 | 47.619 | 69.918 | 18.519 | 25.132 | 43.431 | 30.344 | 40.228 | 51.277 | 25.456 | 10.04  |
| 19.167 | 15.482 | 62.169  | 64.59  | 54.66  | 39.818 | 13.228 | 11.65  | 14.03  | 47.702 | 32.433 | 59.258 | 79.714 | 41.763  | 79.768 | 26.786 | 23.168 | 71.783 | 21.597 | 16.174 | 21.888 | 16.253 | 33.649 | 14.457 | 28.243 | 18.519 |
| 30.423 | 71.429 | 100.561 | 35.348 | 48.064 | 57.93  | 26.975 | 11.119 | 42.328 | 14.162 | 20.786 | 28.06  | 32.736 | 69.902  | 56.137 | 21.895 | 15.77  | 72.352 | 52.025 | 11.905 | 21.754 | 11.838 | 41.005 | 47.674 | 25.09  | 17.354 |
| 20.911 | 58.889 | 95.985  | 15.873 | 46.091 | 26.845 | 42.673 | 11.119 | 26.376 | 14.21  | 61.928 | 31.746 | 63.588 | 50.899  | 52.527 | 39.683 | 40.358 | 43.965 | 64.564 | 50.908 | 18.519 | 18.519 | 11.905 | 76.72  | 19.841 | 47.477 |
| 18.84  | 57.354 | 48.301  | 46.996 | 25.132 | 52.935 | 49.419 | 23.35  | 19.225 | 33.841 | 34.922 | 26.684 | 44.566 | 46.586  | 74.476 | 13.951 | 56.878 | 17.771 | 28.995 | 48.231 | 10.582 | 9.259  | 27.119 | 8.833  | 58.802 | 20.668 |
| 43.431 | 67.46  | 20.117  | 29.594 | 25.661 | 46.639 | 39.406 | 17.417 | 24.185 | 41.976 | 30.423 | 39.89  | 40.033 | 56.714  | 48.936 | 39.284 | 21.635 | 42.61  | 76.72  | 19.841 | 18.228 | 28.884 | 29.101 | 17.33  | 66.402 | 18.917 |
| 21.888 | 60.122 | 25.346  | 9.399  | 51.453 | 30.311 | 41.005 | 26.139 | 43.651 | 26.623 | 15.731 | 15.804 | 62.882 | 69.384  | 50.508 | 31.129 | 51.709 | 44.577 | 25.664 | 28.934 | 31.606 | 38.656 | 20.929 | 17.196 | 53.534 | 32.077 |
| 23.376 | 74.955 | 67.125  | 53.233 | 33.335 | 7.906  | 13.018 | 30.959 | 64.124 | 27.506 | 22.487 | 25.254 | 49.361 | 68.786  | 72.284 | 70.817 | 25.132 | 52.722 | 19.642 | 23.493 | 13.228 | 75.55  | 14.409 | 59.605 | 43.122 | 15.873 |
| 21.754 | 58.694 | 22.487  | 39.364 | 69.084 | 33.672 | 24.784 | 47.829 | 45.148 | 54.204 | 33.079 | 40.12  | 42.473 | 60.738  | 48.637 | 24.779 | 20.257 | 72.19  | 61.774 | 52.814 | 12.49  | 14.205 | 40.153 | 26.991 | 14.559 | 29.828 |
| 18.519 | 38.071 | 43.209  | 55.42  | 37.053 | 30.483 | 18.707 | 28.017 | 49.617 | 22.617 | 18.846 | 39.516 | 74.443 | 15.382  | 11.724 | 37.037 | 42.871 | 20.698 | 71.413 | 28.258 | 12.869 | 30.726 | 12.425 | 17.627 | 48.103 | 45.363 |
| 10.582 | 19.841 | 30.086  | 32.53  | 25.346 | 11.035 | 41.78  | 19.811 | 38.034 | 16.131 | 63.238 | 25.042 | 47.281 | 101.852 | 25.116 | 63.053 | 60.873 | 17.381 | 59.15  | 62.085 | 28.397 | 24.628 | 9.817  | 20.577 | 46.854 | 48.445 |
| 18.228 | 38.106 | 84.599  | 43.623 | 37.037 | 30.496 | 53.169 | 11.233 | 8.327  | 27.017 | 54.006 | 29.432 | 67.116 | 81.961  | 22.487 | 47.125 | 22.503 | 18.519 | 32.197 | 59.524 | 16.174 | 28.348 | 40.01  | 9.21   | 40.537 | 44.383 |
| 31.606 | 64.486 | 47.449  | 55.755 | 20.91  | 26.257 | 17.839 | 31.746 | 51.244 | 18.569 | 24.465 | 51.529 | 19.448 | 59.861  | 52.142 | 64.815 | 26.043 | 89.661 | 34.392 | 50.253 | 17.196 | 25.763 | 19.537 | 19.841 | 28.994 | 35.025 |
| 13.228 | 74.81  | 82.115  | 80.532 | 65.848 | 11.905 | 32.539 | 69.64  | 19.642 | 30.837 | 36.272 | 41.074 | 58.111 | 52.732  | 62.682 | 47.015 | 42.861 | 43.651 | 27.593 | 18.519 | 23.169 | 48.843 | 29.101 | 38.581 | 53.683 | 46.386 |
| 12.49  | 80.647 | 55.266  | 61.368 | 37.037 | 50.061 | 27.411 | 15.701 | 24.138 | 28.566 | 32.154 | 66.871 | 57.519 | 22.468  | 16.531 | 71.289 | 39.683 | 16.53  | 46.618 | 79.736 | 29.101 | 20.847 | 8.877  | 24.849 | 47.195 | 44.269 |
| 12.869 | 57.637 | 22.598  | 53.042 | 15.465 | 16.849 | 72.954 | 31.387 | 33.415 | 19.841 | 31.32  | 14.442 | 42.934 | 29.581  | 21.192 | 58.556 | 53.461 | 34.772 | 44.974 | 30.117 | 14.652 | 36.627 | 29.254 | 37.429 | 35.494 | 51.258 |
| 28.397 | 55.232 | 13.248  | 64.015 | 31.772 | 52.628 | 20.668 | 23.81  | 13.228 | 53.837 | 11.905 | 27.97  | 57.116 | 16.54   | 74.937 | 60.403 | 44.655 | 52.714 | 54.431 | 46.296 | 9.224  | 13.895 | 28.674 | 84.008 | 50.718 | 26.869 |
| 16.174 | 79.754 | 50.924  | 73.375 | 17.036 | 30.236 | 13.434 | 7.937  | 31.727 | 44.974 | 34.209 | 35.252 | 64.192 | 17.196  | 52.91  | 47.096 | 54.468 | 14.55  | 25.763 | 56.463 | 38.408 | 17.132 | 29.481 | 13.608 | 26.781 | 28.955 |
| 17.196 | 67.833 | 16.388  | 52.72  | 21.164 | 22.312 | 51.541 | 45.557 | 63.558 | 46.699 | 26.033 | 34.01  | 62.299 | 20.592  | 57.3   | 12.822 | 44.287 | 14.03  | 18.519 | 33.413 | 15.873 | 23.091 | 32.229 | 68.921 | 23.199 | 22.289 |
| 23.169 | 16.888 | 52.638  | 77.196 | 68.163 | 7.937  | 14.497 | 33.619 | 55.236 | 40.743 | 57.086 | 46.296 | 77.403 | 36.269  | 39.683 | 32.497 | 26.399 | 23.449 | 23.346 | 23.672 | 28.397 | 21.583 | 34.264 | 33.043 | 58.912 | 20.553 |
| 29.101 | 14.55  | 50.076  | 44.812 | 24.227 | 28.246 | 32.296 | 15.616 | 47.619 | 45.602 | 15.402 | 23.81  | 62.707 | 81.575  | 37.05  | 65.473 | 18.347 | 31.372 | 32.281 | 14.183 | 39.959 | 67.962 | 18.519 | 17.623 | 17.196 | 13.228 |
| 14.652 | 45.771 | 47.131  | 77.738 | 34.434 | 35.486 | 15.873 | 52.737 | 35.194 | 50.637 | 39.633 | 18.983 | 55.737 | 42.09   | 29.101 | 49.629 | 20.045 | 21.994 | 28.774 | 25.051 | 16.254 | 19.82  | 22.487 | 26.525 | 41.005 | 43.101 |
| 9.224  | 50.627 | 14.521  | 45.109 | 38.545 | 18.519 | 46.454 | 77.735 | 36.118 | 19.842 | 41.504 | 73.262 | 41.075 | 76.825  | 58.47  | 64.145 | 24.062 | 82.913 | 68.487 | 44.281 | 17.426 | 23.095 | 18.519 | 52.273 | 32.663 | 13.228 |
| 38.408 | 65.678 | 65.754  | 70.38  | 35.141 | 28.464 | 13.015 | 11.224 | 41.839 | 23.678 | 60.547 | 44.442 | 60.198 | 51.435  | 39.184 | 46.217 | 36.455 | 44.974 | 26.781 | 32.621 | 32.969 | 35.306 | 7.937  | 21.795 | 58.505 | 56.357 |
| 15.873 | 66.485 | 17.753  | 46.262 | 23.81  | 41.979 | 37.063 | 17.196 | 50.288 | 30.983 | 31.746 | 75.936 | 41.463 | 33.106  | 57.342 | 47.782 | 32.581 | 83.243 | 18.077 | 39.683 | 17.844 | 33.069 | 12.707 | 14.55  | 14.55  | 19.766 |
| 28.397 | 61.358 | 75.502  | 26.142 | 26.053 | 21.365 | 38.494 | 10.882 | 21.989 | 51.596 | 39.279 | 52.292 | 52.278 | 69.241  | 86.475 | 46.497 | 36.05  | 27.291 | 24.267 | 38.311 | 30.235 | 16.699 | 15.432 | 13.488 | 56.403 | 46.436 |
| 39.959 | 65.4   | 20.86   | 49.698 | 42.429 | 58.201 | 27.778 | 20.884 | 49.379 | 22.759 | 37.008 | 63.551 | 47.068 | 66.628  | 55.989 | 23.282 | 69.214 | 51.496 | 47.049 | 33.436 | 19.247 | 84.532 | 21.513 | 13.228 | 35.493 | 16.836 |
| 16.254 | 61.073 | 52.354  | 70.439 | 54.249 | 26.059 | 25.821 | 21.865 | 23.031 | 19.428 | 26.545 | 21.965 | 35.654 | 22.995  | 18.608 | 11.304 | 51.644 | 22.328 | 56.375 | 29.385 | 20.711 | 20.622 | 42.799 | 14.55  | 23.81  | 62.047 |
| 17.426 | 46.26  | 25.146  | 73.53  | 24.511 | 8.701  | 13.625 | 22.487 | 29.101 | 41.582 | 27.213 | 22.14  | 38.162 | 57.964  | 95.193 | 55.13  | 67.558 | 44.931 | 30.939 | 38.066 | 20.896 | 26.684 | 15.873 | 35.889 | 43.651 | 26.58  |
| 32.969 | 15.711 | 36.882  | 53.476 | 35.322 | 56.215 | 20.584 | 35.249 | 47.611 | 51.987 | 50.137 | 20.437 | 74.56  | 62.811  | 35.381 | 21.298 | 50.637 | 44.971 | 48.29  | 7.77   | 33.583 | 35.754 | 59.6   |        |        |        |

|        |         |         |        |        |        |        |        |        |        |        |        |        |         |        |        |        |        |        |        |        |        |        |        |        |        |
|--------|---------|---------|--------|--------|--------|--------|--------|--------|--------|--------|--------|--------|---------|--------|--------|--------|--------|--------|--------|--------|--------|--------|--------|--------|--------|
| 14.092 | 10.064  | 81.587  | 79.516 | 44.506 | 33.069 | 46.272 | 25.239 | 13.547 | 40.698 | 47.848 | 9.353  | 54.132 | 15.873  | 23.81  | 23.213 | 54.833 | 36.292 | 47.328 | 19.892 | 28.255 | 19.841 | 17.196 | 48.916 | 47.522 | 28.995 |
| 11.014 | 33.879  | 82.555  | 53.265 | 22.032 | 18.288 | 13.21  | 18.519 | 16.321 | 18.529 | 18.226 | 33.139 | 64.588 | 20.619  | 65.283 | 19.089 | 22.874 | 73.535 | 13.326 | 20.08  | 27.778 | 35.714 | 57.978 | 47.046 | 17.982 | 45.485 |
| 21.433 | 44.129  | 53.045  | 56.213 | 21.213 | 30.903 | 24.687 | 19.919 | 66.185 | 42.085 | 38.307 | 22.918 | 39.135 | 70.261  | 29.348 | 20.639 | 31.07  | 40.845 | 44.15  | 48.532 | 13.529 | 27.44  | 11.719 | 24.997 | 52.732 | 31.746 |
| 25.338 | 47.391  | 18.333  | 18.934 | 35.714 | 49.365 | 35.818 | 11.599 | 39.984 | 29.821 | 27.793 | 55.189 | 60.161 | 50.606  | 55.873 | 35.714 | 57.104 | 43.092 | 37.746 | 11.636 | 16.836 | 69.139 | 38.36  | 43.025 | 50.493 | 32.224 |
| 20.119 | 64.589  | 62.144  | 91.377 | 18.924 | 60.554 | 39.282 | 63.142 | 13.095 | 19.421 | 72.844 | 28.284 | 40.873 | 62.332  | 46.287 | 24.526 | 61.415 | 24.73  | 52.768 | 14.323 | 31.766 | 21.339 | 21.547 | 50.265 | 42.549 | 14.257 |
| 16.609 | 24.981  | 60.459  | 39.683 | 25.299 | 28.057 | 18.431 | 12.456 | 33.687 | 27.021 | 45.6   | 42.767 | 45.561 | 77.648  | 61.87  | 37.451 | 46.822 | 23.81  | 30.107 | 60.123 | 14.681 | 31.808 | 39.67  | 51.844 | 51.682 | 10.884 |
| 73.877 | 20.843  | 30.12   | 71.864 | 23.81  | 21.504 | 52.91  | 25.541 | 23.795 | 23.312 | 25.41  | 31.746 | 43.651 | 98.156  | 84.731 | 35.57  | 63.902 | 56.159 | 15.085 | 20.577 | 17.196 | 12.159 | 11.687 | 32.736 | 37.037 | 55.604 |
| 15.236 | 40.442  | 67.289  | 36.284 | 51.785 | 17.196 | 18.273 | 10.289 | 24.393 | 37.552 | 18.288 | 55.67  | 56.673 | 11.921  | 18.519 | 9.019  | 50.396 | 66.138 | 33.069 | 29.654 | 26.399 | 21.72  | 11.776 | 22.464 | 39.087 | 26.455 |
| 28.255 | 40.98   | 79.563  | 43.209 | 12.792 | 19.642 | 20.708 | 16.836 | 37.875 | 16.57  | 19.841 | 21.387 | 41.809 | 48.942  | 30.971 | 79.153 | 26.221 | 59.238 | 32.784 | 50.216 | 16.157 | 39.226 | 14.03  | 41.581 | 57.845 | 68.5   |
| 27.778 | 19.999  | 68.986  | 46.786 | 31.07  | 27.364 | 22.666 | 14.55  | 54.864 | 27.791 | 35.714 | 36.533 | 59.08  | 42.546  | 61.067 | 42.395 | 22.154 | 17.794 | 73.651 | 27.22  | 12.024 | 37.877 | 20.15  | 24.256 | 27.634 | 78.042 |
| 13.529 | 73.953  | 58.236  | 33.473 | 23.81  | 20.147 | 23.745 | 16.552 | 19.841 | 13.515 | 47.619 | 19.841 | 79.049 | 18.311  | 47.928 | 18.621 | 44.8   | 79.365 | 39.452 | 51.119 | 37.219 | 33.825 | 34.607 | 45.831 | 61.938 | 33.712 |
| 16.836 | 31.044  | 32.549  | 16.763 | 27.8   | 13.967 | 12.977 | 31.746 | 28.674 | 14.965 | 31.264 | 9.259  | 62.07  | 21.407  | 47.95  | 44.274 | 47.815 | 40.427 | 43.651 | 61.682 | 17.771 | 26.953 | 23.81  | 43.626 | 53.936 | 43.025 |
| 31.766 | 50.265  | 39.665  | 21.122 | 30.736 | 16.609 | 41.517 | 46.353 | 29.746 | 48.284 | 17.879 | 50.457 | 46.446 | 50.065  | 69.645 | 33.069 | 58.208 | 38.656 | 48.841 | 37.053 | 19.409 | 13.228 | 52.247 | 30.841 | 38.931 | 16.686 |
| 14.681 | 46.744  | 47.702  | 23.291 | 60.796 | 16.086 | 12.159 | 30.423 | 22.326 | 40.438 | 47.953 | 30.423 | 55.463 | 30.423  | 54.233 | 49.475 | 56.536 | 70.688 | 16.612 | 51.587 | 25.239 | 19.158 | 16.527 | 60.186 | 51.831 | 33.374 |
| 17.196 | 34.333  | 31.746  | 54.377 | 63.313 | 17.196 | 12.286 | 58.926 | 52.145 | 35.401 | 22.487 | 13.228 | 82.146 | 14.914  | 38.381 | 72.385 | 60.382 | 56.161 | 13.119 | 28.744 | 17.196 | 23.81  | 17.317 | 19.499 | 22.431 | 60.22  |
| 26.399 | 59.524  | 67.036  | 60.755 | 22.452 | 26.637 | 34.74  | 20.257 | 28.602 | 34.535 | 30.423 | 34.822 | 57.938 | 11.172  | 46.486 | 16.66  | 50.478 | 52.91  | 48.068 | 51.203 | 26.292 | 19.665 | 25.132 | 47.685 | 33.092 | 44.283 |
| 16.157 | 57.564  | 41.419  | 35.018 | 42.002 | 26.455 | 42.623 | 10.651 | 49.577 | 41.005 | 46.851 | 33.079 | 53.595 | 18.519  | 34.36  | 18.917 | 59.524 | 76.378 | 72.801 | 56.878 | 24.785 | 37.325 | 17.98  | 14.556 | 20.577 | 26.009 |
| 12.024 | 28.515  | 47.858  | 78.818 | 34.943 | 23.382 | 66.871 | 18.928 | 65.248 | 44.974 | 35.714 | 32.604 | 15.567 | 31.746  | 19.096 | 39.112 | 41.299 | 14.965 | 58.89  | 37.93  | 35.211 | 11.905 | 43.651 | 76.499 | 36.689 | 14.118 |
| 37.219 | 20.5    | 66.087  | 14.323 | 53.964 | 45.325 | 46.489 | 24.256 | 40.589 | 22.759 | 27.23  | 17.196 | 91.53  | 18.707  | 15.873 | 54.233 | 62.645 | 24.846 | 30.423 | 43.53  | 31.746 | 54.769 | 15.166 | 9.259  | 55.422 | 21.105 |
| 17.711 | 73.231  | 82.638  | 60.356 | 51.195 | 18.288 | 20.353 | 34.906 | 76.312 | 27.778 | 26.653 | 10.582 | 54.022 | 47.809  | 51.102 | 21.819 | 24.856 | 31.803 | 22.448 | 58.838 | 31.972 | 71.677 | 27.506 | 19.811 | 46.315 | 44.974 |
| 19.409 | 47.472  | 12.138  | 59.524 | 52.001 | 64.352 | 36.97  | 17.578 | 33.442 | 41.478 | 27.788 | 26.357 | 89.584 | 13.392  | 49.171 | 43.478 | 25.395 | 22.765 | 27.658 | 28.86  | 34.392 | 44.846 | 8.845  | 24.266 | 24.039 | 13.228 |
| 25.239 | 18.519  | 19.701  | 46.577 | 57.173 | 29.545 | 14.09  | 48.115 | 80.997 | 55.911 | 43.203 | 37.037 | 39.843 | 44.757  | 76.24  | 73.616 | 51.587 | 44.808 | 47.619 | 29.118 | 21.492 | 23.286 | 41.924 | 36.906 | 21.044 | 62.527 |
| 17.196 | 10.804  | 41.761  | 43.551 | 36.392 | 15.067 | 31.322 | 45.923 | 31.949 | 31.19  | 18.519 | 23.889 | 36.478 | 23.383  | 17.809 | 16.477 | 19.65  | 23.089 | 19.531 | 17.405 | 26.455 | 21.513 | 39.683 | 29.151 | 33.314 | 51.587 |
| 26.292 | 56.825  | 104.193 | 63.119 | 50.117 | 14.55  | 33.677 | 17.196 | 39.677 | 15.016 | 18.684 | 37.768 | 30.129 | 78.497  | 10.641 | 57.024 | 22.487 | 11.905 | 37.037 | 65.878 | 38.36  | 40.017 | 30.23  | 27.255 | 17.771 | 56.628 |
| 24.785 | 34.926  | 55.06   | 44.64  | 60.781 | 32.924 | 13.228 | 50.192 | 28.945 | 30.197 | 17.196 | 60.326 | 96.989 | 42.328  | 63.053 | 46.79  | 51.022 | 23.669 | 43.712 | 50.09  | 26.802 | 12.968 | 13.228 | 9.105  | 32.549 | 52.466 |
| 35.211 | 19.642  | 46.146  | 49.52  | 68.873 | 46.39  | 35.056 | 11.244 | 46.518 | 27.922 | 24.843 | 45.459 | 93.311 | 63.076  | 42.184 | 14.55  | 22.115 | 67.702 | 39.683 | 29.196 | 26.316 | 31.626 | 23.389 | 30.086 | 38.994 | 21.122 |
| 31.746 | 65.985  | 73.136  | 54.233 | 20.036 | 14.893 | 35.542 | 20.405 | 27.77  | 28.699 | 11.009 | 18.83  | 53.416 | 30.345  | 46.296 | 12.837 | 38.36  | 48.577 | 28.93  | 24.327 | 14.03  | 48.454 | 17.26  | 21.106 | 19.412 | 23.312 |
| 31.972 | 14.956  | 83.278  | 58.523 | 53.2   | 41.752 | 24.541 | 26.638 | 37.217 | 27.803 | 51.901 | 49.472 | 55.904 | 84.686  | 56.206 | 45.271 | 51.443 | 27.778 | 19.841 | 47.516 | 54     | 17.786 | 22.614 | 14.08  | 15.722 | 38.021 |
| 34.392 | 12.523  | 41.005  | 17.339 | 24.553 | 31.262 | 42.76  | 18.519 | 56.545 | 44.974 | 40.71  | 50.791 | 76.302 | 53.683  | 40.894 | 21.164 | 52.092 | 17.658 | 70.403 | 14.918 | 22.256 | 13.228 | 28.995 | 24.492 | 51.295 | 67.24  |
| 21.492 | 35.6    | 55.619  | 31.098 | 28.887 | 11.271 | 24.318 | 23.23  | 22.087 | 23.198 | 44.785 | 12.698 | 58.235 | 69.781  | 27.778 | 49.921 | 32.288 | 60.796 | 32.247 | 16.747 | 12.428 | 9.259  | 63.882 | 19.642 | 46.009 | 43.431 |
| 26.455 | 61.174  | 43.831  | 63.686 | 26.768 | 22.435 | 36.828 | 50.508 | 25.233 | 13.418 | 31.746 | 21.164 | 41.278 | 106.146 | 51.381 | 60.555 | 63.514 | 54.439 | 23.327 | 26.926 | 28.05  | 10.582 | 17.196 | 36.955 | 43.96  | 46.052 |
| 38.36  | 79.983  | 29.285  | 54.249 | 19.841 | 31.704 | 40.68  | 61.533 | 12.159 | 33.672 | 15.873 | 34.336 | 42.026 | 44.701  | 30.65  | 34.533 | 42.344 | 61.825 | 22.375 | 53.692 | 30.866 | 26.764 | 37.744 | 16.584 | 52.91  | 43.78  |
| 26.802 | 26.373  | 43.936  | 37.037 | 21.891 | 13.913 | 37.529 | 15.901 | 26.971 | 23.354 | 33.482 | 21.764 | 63.922 | 74.779  | 8.514  | 18.944 | 42.461 | 53.205 | 36.647 | 42.312 | 15.901 | 21.653 | 18.719 | 52.089 | 42.006 | 35.542 |
| 26.316 | 42.72   | 58      | 25.346 | 21.144 | 44.2   | 31.255 | 27.166 | 27.405 | 43.67  | 17.771 | 48.398 | 64.15  | 71.925  | 57.022 | 28.983 | 55.802 | 22.487 | 38.36  | 21.164 | 14.353 | 28.06  | 27.253 | 80.241 | 37.937 | 48.712 |
| 14.03  | 14.55   | 48.411  | 33.677 | 32.107 | 36.611 | 19.642 | 19.356 | 42.823 | 23.05  | 43.651 | 27.692 | 24.263 | 10.291  | 47.334 | 55.718 | 53.861 | 27.407 | 51.262 | 51.76  | 30.866 | 19.096 | 27.207 | 27.778 | 54.559 | 26.117 |
| 54     | 38.458  | 65.356  | 36.322 | 62.978 | 51.322 | 27.205 | 16.836 | 45.418 | 19.648 | 41.828 | 18.519 | 55.81  | 66.4    | 47.331 | 14.55  | 38.483 | 44.596 | 45.831 | 31.687 | 16.566 | 38.341 | 24.156 | 41.208 | 15.172 | 69.792 |
| 22.256 | 62.605  | 26.953  | 27.555 | 41.07  | 50.776 | 15.873 | 39.906 | 49.635 | 16.368 | 42.556 | 20.419 | 61.801 | 17.42   | 16.116 | 21.106 | 53.84  | 34.292 | 14.01  | 26.535 | 34.727 | 17.833 | 31.984 | 12.164 | 20.813 | 46.466 |
| 12.428 | 59.409  | 43.025  | 48.421 | 41.005 | 14.339 | 19.572 | 26.239 | 38.35  | 27.217 | 22.565 | 18.519 | 14.438 | 21.677  | 77.825 | 30.696 | 16.824 | 44.529 | 38.36  | 59.407 | 14.427 | 45.4   | 20.374 | 21.235 | 38.905 | 53.632 |
| 28.05  | 41.199  | 84.595  | 73.388 | 15.983 | 49.572 | 11.475 | 26.125 | 30.239 | 23.008 | 43.422 | 63.867 | 40.832 | 105.775 | 47.619 | 13.228 | 58.738 | 18.519 | 58.685 | 16.075 | 22.606 | 14.535 | 11.905 | 17.771 | 25.711 | 66.654 |
| 30.866 | 63.492  | 91.564  | 83.082 | 42.139 | 19.143 | 17.775 | 22.448 | 42.188 | 42.328 | 55.644 | 36.448 | 32.322 | 32.67   | 35.494 | 60.847 | 63.567 | 64.174 | 23.81  | 27.273 | 16.336 | 43.402 | 59.894 | 42.328 | 34.316 | 75.352 |
| 15.901 | 76.177  | 14.819  | 80.555 | 35.102 | 46.296 | 17.332 | 15.255 | 63.095 | 36.789 | 50.262 | 30.169 | 38.912 | 36.558  | 59.772 | 19.998 | 52.108 | 46.676 | 57.395 | 9.732  | 10.001 | 16.836 | 37.642 | 17.418 | 37.413 | 40.929 |
| 14.353 | 44.974  | 72.657  | 22.887 | 46.73  | 25.132 | 41.843 | 31.103 | 16.042 | 39.122 | 44.273 | 40.166 | 72.955 | 86.833  | 35.166 | 48.67  | 22.229 | 38.793 | 15.902 | 29.763 | 41.412 | 33.739 | 9.353  | 24.86  | 25.527 | 62.053 |
| 30.866 | 103.011 | 47.619  | 56.11  | 29.101 | 11.073 | 30.855 | 19.096 | 15.873 | 18.246 | 28.462 | 71.732 | 67.46  | 30.423  | 48.699 | 22.253 | 46.817 | 45.584 | 46.673 | 40.028 | 46.523 | 34.906 | 25.879 | 25.706 |        |        |

|        |        |         |        |        |        |        |        |        |        |        |        |        |         |        |        |        |        |        |        |        |        |        |        |        |        |
|--------|--------|---------|--------|--------|--------|--------|--------|--------|--------|--------|--------|--------|---------|--------|--------|--------|--------|--------|--------|--------|--------|--------|--------|--------|--------|
| 26.444 | 79     | 68.292  | 78.092 | 35.995 | 19.793 | 50.898 | 14.965 | 35.324 | 39.759 | 39.683 | 14.377 | 55.514 | 39.465  | 19.966 | 43.651 | 53.019 | 15.944 | 50.292 | 49.572 | 21.513 | 32.179 | 10.022 | 14.55  | 20.168 | 42.372 |
| 8.877  | 28.886 | 102.265 | 66.784 | 40.585 | 31.886 | 42.1   | 23.422 | 22.24  | 46.161 | 31.746 | 37.86  | 48.16  | 86.342  | 45.089 | 75.328 | 60.796 | 16.57  | 58.391 | 54.034 | 28.455 | 26.455 | 11.787 | 46.336 | 50.508 | 68.279 |
| 43.474 | 20.313 | 23.333  | 48.499 | 45.831 | 17.771 | 9.023  | 9.25   | 11.757 | 65.261 | 21.308 | 44.754 | 26.868 | 59.025  | 46.307 | 40.051 | 43.651 | 44.316 | 32.857 | 52.943 | 20.577 | 26.455 | 39.745 | 27.62  | 68.811 | 39.71  |
| 19.58  | 58.836 | 62.527  | 29.2   | 69.584 | 50.615 | 24.965 | 35.171 | 36.845 | 25.262 | 21.682 | 43.04  | 43.96  | 28.765  | 59.078 | 42.547 | 24.272 | 57.98  | 25.005 | 15.224 | 16.495 | 23.81  | 14.944 | 23.327 | 29.212 | 47.619 |
| 36.598 | 57.562 | 10.477  | 40.732 | 28.403 | 19.292 | 11.424 | 17.662 | 39.318 | 25.991 | 41.978 | 31.23  | 30.872 | 64.848  | 52.926 | 58.201 | 44.459 | 27.62  | 21.298 | 17.196 | 10.479 | 32.418 | 11.905 | 23.925 | 43.504 | 37.037 |
| 19.723 | 67.813 | 43.944  | 60.907 | 57.077 | 18.111 | 13.228 | 38.505 | 41.005 | 19.504 | 51.888 | 32.736 | 31.796 | 13.228  | 11.013 | 16.157 | 26.089 | 20.353 | 21.759 | 40.176 | 41.005 | 24.282 | 31.905 | 25.459 | 36.253 | 8.484  |
| 23.724 | 27.992 | 95.896  | 34.2   | 35.714 | 29.481 | 19.801 | 34.515 | 11.905 | 41.005 | 83.812 | 45.25  | 13.349 | 63.615  | 43.78  | 51.096 | 55.556 | 54.861 | 21.164 | 33.367 | 15.385 | 26.455 | 18.41  | 10.582 | 47.734 | 26.953 |
| 9.89   | 62.355 | 62.169  | 44.974 | 41.005 | 21.97  | 20.138 | 22.487 | 48.877 | 26.455 | 27.265 | 9.259  | 71.858 | 36.46   | 23.61  | 46.296 | 28.884 | 22.495 | 34.352 | 11.187 | 13.228 | 23.157 | 21.467 | 20.157 | 69.166 | 22.407 |
| 17.771 | 44.734 | 51.106  | 38.095 | 27.124 | 51.762 | 27.231 | 57.851 | 44.59  | 52.546 | 23.81  | 19.467 | 24.849 | 38.36   | 57.286 | 24.184 | 25.799 | 28.968 | 21.182 | 17.789 | 30.205 | 8.29   | 15.901 | 26.352 | 41.478 | 25.864 |
| 21.513 | 84.49  | 63.347  | 43.96  | 32.086 | 21.264 | 21.164 | 32.29  | 44.621 | 44.974 | 24.232 | 36.593 | 37.419 | 68.238  | 45.596 | 44.266 | 17.596 | 29.955 | 60.105 | 28.843 | 27.967 | 22.402 | 13.228 | 8.194  | 55.185 | 53.226 |
| 28.455 | 19.575 | 10.582  | 49.712 | 39.781 | 25.396 | 11.905 | 15.873 | 41.261 | 18.519 | 37.562 | 15.673 | 43.284 | 61.173  | 16.9   | 8.384  | 69.269 | 10.582 | 52.569 | 22.68  | 29.361 | 11.992 | 14.632 | 34.059 | 31.044 | 14.414 |
| 20.577 | 12.666 | 81.979  | 54.147 | 34.392 | 23.383 | 45.406 | 24.653 | 37.878 | 36.761 | 24.592 | 19.25  | 19.642 | 51.443  | 25.942 | 41.005 | 52.91  | 15.42  | 13.601 | 48.869 | 18.519 | 26.189 | 40.598 | 58.413 | 41.753 | 24.54  |
| 16.495 | 62.756 | 78.955  | 53.576 | 22.871 | 30.678 | 16.891 | 7.937  | 26.979 | 25.774 | 53.314 | 21.917 | 44.089 | 64.548  | 26.455 | 26.103 | 68.983 | 19.841 | 24.555 | 25.575 | 17.118 | 13.177 | 27.567 | 17.005 | 17.549 | 39.343 |
| 10.479 | 34.709 | 41.711  | 66.688 | 10.582 | 66.696 | 13.753 | 30.423 | 41.154 | 27.227 | 17.946 | 44.352 | 77.465 | 61.789  | 18.083 | 18.151 | 34.48  | 47.912 | 20.958 | 45.597 | 18.08  | 17.642 | 24.229 | 24.911 | 42.373 | 24.89  |
| 41.005 | 49.042 | 69.734  | 72.259 | 20.509 | 57.731 | 10.628 | 50.782 | 43.78  | 41.075 | 39.136 | 49.622 | 44.52  | 76.357  | 41.154 | 36.068 | 66.251 | 35.041 | 57.398 | 33.16  | 28.45  | 44.29  | 24.318 | 24.878 | 38.619 | 39.167 |
| 15.385 | 12.715 | 26.455  | 50.979 | 12.558 | 18.697 | 20.362 | 20.519 | 45.145 | 31.194 | 26.463 | 40.793 | 9.592  | 53.759  | 58.997 | 64.292 | 48.718 | 24.853 | 27.243 | 29.2   | 17.295 | 11.871 | 15.873 | 16.045 | 42.292 | 36.978 |
| 13.228 | 60.999 | 59.344  | 19.559 | 31.773 | 39.58  | 12.993 | 18.707 | 23.105 | 35.714 | 15.717 | 26.934 | 86.258 | 49.367  | 25.449 | 15.432 | 68.506 | 56.645 | 19.864 | 25.836 | 25.018 | 35.542 | 22.825 | 60.498 | 29.539 | 45.848 |
| 30.205 | 40.291 | 73.339  | 19.465 | 40.285 | 32.47  | 16.67  | 38.052 | 21.164 | 16.667 | 31.704 | 43.873 | 37.413 | 23.81   | 53.853 | 15.056 | 53.315 | 55.439 | 73.025 | 36.16  | 21.292 | 16.76  | 32.956 | 45.982 | 38.66  | 96.987 |
| 27.967 | 74.862 | 76.879  | 52.946 | 27.124 | 13.228 | 39.595 | 34.4   | 45.313 | 14.583 | 32.961 | 44.75  | 59.41  | 53.652  | 47.702 | 36.253 | 42.527 | 42.328 | 40.201 | 51.216 | 18.524 | 22.448 | 40.701 | 59.073 | 54.737 | 52.22  |
| 29.361 | 68.059 | 68.72   | 56.941 | 44.284 | 18.519 | 26.798 | 7.523  | 60.72  | 7.937  | 30.65  | 47.989 | 65.094 | 21.164  | 55.849 | 44.795 | 35.295 | 34.722 | 41.694 | 23.99  | 33.863 | 13.006 | 11.905 | 43.651 | 50.477 | 30.762 |
| 18.519 | 47.461 | 71.46   | 66.138 | 36.896 | 46.815 | 18.117 | 23.81  | 24.711 | 48.878 | 10.651 | 66.413 | 92.888 | 84.004  | 27.241 | 24.318 | 35.714 | 25.062 | 37.404 | 46.296 | 13.578 | 13.228 | 14.626 | 30.866 | 49.705 | 66.138 |
| 17.118 | 62.348 | 45.318  | 72.27  | 34.329 | 11.899 | 43.496 | 9.247  | 36.478 | 22.033 | 26.238 | 50.359 | 57.411 | 65.16   | 9.259  | 21.164 | 26.013 | 46.444 | 51.483 | 17.479 | 18.699 | 40.108 | 12.128 | 15.231 | 34.392 | 46.02  |
| 18.08  | 66.99  | 85.739  | 50.606 | 62.093 | 69.589 | 20.905 | 45.946 | 30.464 | 41.005 | 32.539 | 16.399 | 58.334 | 30.862  | 38.096 | 49.906 | 28.994 | 57.052 | 65.293 | 40.529 | 33.069 | 28.468 | 49.195 | 13.155 | 63.949 | 30.483 |
| 28.45  | 65.875 | 51.16   | 43.963 | 26.756 | 40.219 | 26.379 | 30.423 | 57.333 | 27.407 | 19.323 | 21.674 | 99.987 | 100.625 | 13.532 | 62.892 | 57.996 | 29.375 | 48.258 | 31.141 | 21.301 | 31.94  | 23.383 | 23.489 | 35.542 | 56.671 |
| 17.295 | 48.669 | 28.035  | 46.614 | 20.094 | 44.756 | 49.217 | 9.002  | 56.638 | 21.164 | 15.049 | 51.291 | 53.812 | 36.264  | 63.591 | 36.807 | 61.937 | 30.539 | 42.254 | 63.074 | 21.379 | 27.124 | 13.327 | 39.882 | 30.249 | 42.328 |
| 25.018 | 12.769 | 86.379  | 68.624 | 29.008 | 20.997 | 35.977 | 22.962 | 55.617 | 18.519 | 38.074 | 42.273 | 49.572 | 63.492  | 50.265 | 19.372 | 30.124 | 60.969 | 63.183 | 37.572 | 29.345 | 34.03  | 27.201 | 31.744 | 32.631 | 57.701 |
| 21.292 | 44.149 | 63.502  | 36.478 | 65.546 | 24.732 | 15.267 | 29.285 | 25.706 | 27.4   | 21.511 | 49.912 | 30.358 | 18.169  | 26.065 | 14.722 | 73.947 | 49.646 | 26.805 | 17.857 | 15.77  | 15.351 | 16.654 | 32.966 | 55.415 | 22.487 |
| 18.524 | 47.754 | 9.07    | 61.817 | 61.505 | 40.803 | 37.853 | 36.935 | 31.356 | 25.254 | 62.606 | 50.48  | 26.535 | 74.7    | 7.183  | 51.584 | 50.265 | 61.722 | 32.334 | 25.132 | 22.368 | 27.989 | 14.138 | 11.905 | 24.972 | 28.376 |
| 33.863 | 78.458 | 90.673  | 60.416 | 27.187 | 39.005 | 31.245 | 18.519 | 43.732 | 25.674 | 26.366 | 48.901 | 31.704 | 35.476  | 20.939 | 32.908 | 15.375 | 30.662 | 17.771 | 48.906 | 27.104 | 21.948 | 26.35  | 21.696 | 34.392 | 25.132 |
| 13.578 | 78.261 | 55.556  | 55.453 | 25.859 | 48.515 | 38.039 | 49.858 | 47.594 | 20.377 | 25.211 | 17.196 | 67.929 | 58.823  | 27.082 | 47.619 | 41.154 | 46.296 | 51.611 | 21.164 | 11.905 | 10.128 | 14.199 | 33.069 | 37.008 | 48.694 |
| 18.699 | 45.258 | 81.573  | 33.069 | 28.847 | 28.819 | 27.447 | 13.46  | 20.905 | 23.354 | 33.672 | 45.939 | 36.222 | 68.695  | 43.96  | 38.304 | 24.608 | 33.98  | 20.121 | 55.464 | 15.845 | 22.487 | 15.472 | 20.577 | 56.895 | 12.553 |
| 33.069 | 66.042 | 54.206  | 49.966 | 37.182 | 12.509 | 41.919 | 12.628 | 17.078 | 11.905 | 19.973 | 53.085 | 55.676 | 10.964  | 10.096 | 23.157 | 22.943 | 23.708 | 60.523 | 18.346 | 38.18  | 8.493  | 19.841 | 52.079 | 67.524 | 17.727 |
| 21.301 | 18.519 | 72.02   | 68.783 | 32.539 | 25.132 | 19.737 | 38.738 | 39.532 | 42.328 | 27.778 | 51.049 | 28.91  | 57.967  | 15.161 | 59.159 | 47.404 | 54.233 | 21.089 | 47.619 | 18.519 | 15.736 | 18.553 | 52.376 | 31.566 | 55.135 |
| 21.379 | 69.763 | 29.405  | 58.412 | 54.835 | 22.545 | 34.392 | 17.576 | 29.101 | 19.055 | 18.34  | 44.03  | 54.864 | 29.85   | 23.568 | 16.836 | 27.575 | 60.847 | 55.33  | 29.979 | 11.304 | 13.228 | 17.26  | 36.209 | 14.965 | 65.519 |
| 29.345 | 54.023 | 13.228  | 47.53  | 35.542 | 28.561 | 23.669 | 33.733 | 36.237 | 22.759 | 47.534 | 43.312 | 34.876 | 38.731  | 69.658 | 39.612 | 41.098 | 30.423 | 24.318 | 8.132  | 13.018 | 31.362 | 29.93  | 30.127 | 37.522 | 18.519 |
| 15.77  | 45.194 | 72.098  | 66.013 | 36.478 | 23.383 | 23.81  | 36.161 | 47.89  | 34.803 | 30.866 | 21.928 | 8.384  | 68.378  | 14.119 | 28.995 | 21.164 | 38.608 | 56.513 | 42.596 | 17.196 | 47.401 | 26.313 | 28.712 | 28.047 | 39.672 |
| 22.368 | 35.088 | 84.951  | 73.317 | 46.296 | 21.181 | 20.292 | 28.045 | 37.871 | 42.238 | 41.005 | 39.652 | 9.259  | 63.597  | 18.488 | 22.797 | 29.979 | 28.047 | 28.717 | 26.147 | 11.224 | 11.905 | 32.563 | 41.124 | 60.796 | 21.164 |
| 27.104 | 38.461 | 71.085  | 50.864 | 31.959 | 39.683 | 31.188 | 32.99  | 37.395 | 50.493 | 25.645 | 35.89  | 48.443 | 63.25   | 27.384 | 55.053 | 26.47  | 77.254 | 66.283 | 13.634 | 18.149 | 14.118 | 19.446 | 28.813 | 37.201 | 29.101 |
| 11.905 | 57.744 | 24.386  | 45.907 | 44.772 | 11.063 | 27.406 | 19.513 | 44.641 | 25.132 | 12.431 | 7.7    | 24.3   | 28.87   | 15.173 | 40.825 | 61.846 | 19.841 | 11.531 | 18.717 | 32.37  | 31.808 | 13.228 | 39.474 | 53.226 | 35.513 |
| 15.845 | 77.564 | 25.082  | 14.199 | 54.989 | 26.368 | 13.228 | 36.684 | 24.677 | 53.62  | 52.516 | 30.107 | 45.83  | 81.115  | 69.327 | 11.503 | 29.101 | 51.324 | 19.554 | 19.841 | 24.722 | 29.048 | 11.834 | 30.439 | 29.566 | 87.094 |
| 38.18  | 62.608 | 76.72   | 40.196 | 41.209 | 14.356 | 65.216 | 53.926 | 25.433 | 49.372 | 59.762 | 56.375 | 51.371 | 55.036  | 15.899 | 19.832 | 48.971 | 32.633 | 56.693 | 17.371 | 15.467 | 17.196 | 14.442 | 11.905 | 39.63  | 40.292 |
| 18.519 | 24.235 | 74.852  | 61.14  | 17.319 | 26.474 | 23.072 | 17.156 | 41.081 | 25.868 | 74.143 | 32.677 | 44.974 | 76.571  | 76.72  | 53.179 | 44.338 | 39.205 | 36.219 | 7.937  | 48.637 | 21.499 | 30.337 | 28.772 | 47.815 | 32.322 |
| 11.304 | 37.465 | 53.349  | 50.146 | 26.189 | 44.974 | 38.612 | 14.977 | 46.007 | 14.965 | 18.781 | 26.945 | 66.408 | 74.074  | 17.196 | 46.766 | 64.538 | 35.442 | 27.026 | 23.422 | 20.121 | 27.778 | 17.196 | 42.826 | 13     |        |

|        |        |        |        |        |        |        |        |        |        |        |        |        |        |        |        |        |        |        |        |        |        |        |        |        |        |
|--------|--------|--------|--------|--------|--------|--------|--------|--------|--------|--------|--------|--------|--------|--------|--------|--------|--------|--------|--------|--------|--------|--------|--------|--------|--------|
| 21.843 | 63.242 | 74.672 | 67.949 | 46.026 | 48.397 | 20.498 | 17.84  | 34.994 | 30.423 | 16.464 | 28.709 | 21.381 | 76.765 | 54.103 | 37.54  | 52.829 | 56.421 | 29.283 | 42.328 | 17.16  | 21.819 | 29.722 | 44.612 | 55.556 | 69.868 |
| 20.453 | 21.164 | 23.132 | 30.217 | 32.799 | 38.471 | 14.965 | 44.594 | 23.585 | 20.577 | 53.638 | 55.967 | 74.131 | 40.164 | 42.09  | 32.629 | 10.212 | 49.341 | 27.094 | 54.378 | 23.082 | 21.032 | 27.807 | 56.878 | 18.519 | 43.275 |
| 7.937  | 62.84  | 79.575 | 82.946 | 31.309 | 43.022 | 26.535 | 24.862 | 38.877 | 62.279 | 20.577 | 33.069 | 77.615 | 19.45  | 19.993 | 21.434 | 22.187 | 68.582 | 76.11  | 76.09  | 28.995 | 25.669 | 13.018 | 43.651 |        |        |
| 67.07  | 96.354 | 74.238 | 19.093 | 43.638 | 12.645 | 33.987 | 53.163 | 30.266 | 33.666 | 28.825 | 35.334 | 54.233 | 63.095 | 25.132 | 54.824 | 30.063 | 42.328 | 56.547 | 63.662 | 24.263 | 28.397 | 31.249 | 23.132 |        |        |
| 16.836 | 22.003 | 62.725 | 32.534 | 20.149 | 55.556 | 55.208 | 58.093 | 35.762 | 49.789 | 40.529 | 73.097 | 61.564 | 63.013 | 25.132 | 25.394 | 51.587 | 31.348 | 25.464 | 34.017 | 11.79  | 39.14  | 14.159 | 19.816 |        |        |
| 23.99  | 60.587 | 27.251 | 59.75  | 23.676 | 21.768 | 23.682 | 42.658 | 65.399 | 37.334 | 38.291 | 24.526 | 71.429 | 63.317 | 85.994 | 43.557 | 30.015 | 74.6   | 58.457 | 27.61  | 13.609 | 28.73  | 35.145 | 53.314 |        |        |
| 31.365 | 45.767 | 63.453 | 40.979 | 16.125 | 54.769 | 16.62  | 33.672 | 42.637 | 38.36  | 31.746 | 43.651 | 31.905 | 66.138 | 55.556 | 33.376 | 21.815 | 12.913 | 23.372 | 45.748 | 14.572 | 9.948  | 21.164 | 44.951 |        |        |
| 30.163 | 40.426 | 58.933 | 55.989 | 26.189 | 21.677 | 15.919 | 18.061 | 57.655 | 24.211 | 27.861 | 58.953 | 39.75  | 11.228 | 44.773 | 48.661 | 78.416 | 48.942 | 39.17  | 66.729 | 52.49  | 9.181  | 37.289 | 41.359 |        |        |
| 24.466 | 25.429 | 54.275 | 23.596 | 31.687 | 16.788 | 11.987 | 41.005 | 57.426 | 44.048 | 23.316 | 44.974 | 54.909 | 44.896 | 50.508 | 43.336 | 18.151 | 35.91  | 24.709 | 39.051 | 11.952 | 23.116 | 46.688 | 48.34  |        |        |
| 37.613 | 49.343 | 34.371 | 34.728 | 38.309 | 24.318 | 15.386 | 45.69  | 14.92  | 37.037 | 81.087 | 32.288 | 64.371 | 63.716 | 12.189 | 42.036 | 28.759 | 68.812 | 37.158 | 38.27  | 11.905 | 12.428 | 30.118 | 44.431 |        |        |
| 17.16  | 69.425 | 27.376 | 43.984 | 46.296 | 30.022 | 11.905 | 46.103 | 22.858 | 41.378 | 32.407 | 43.923 | 65.221 | 59.409 | 18.512 | 47.619 | 60.263 | 33.672 | 70.803 | 80.32  | 11.905 | 28.446 | 11.905 | 16.317 |        |        |
| 23.082 | 79.265 | 58.434 | 18.363 | 17.005 | 25.132 | 27.163 | 22.43  | 28.995 | 46.361 | 33.482 | 24.387 | 40.822 | 16.107 | 15.873 | 57.415 | 29.423 | 75.229 | 56.244 | 51.722 | 29.914 | 18.511 | 15.873 | 17.219 |        |        |
| 28.995 | 21.403 | 39.284 | 17.196 | 29.101 | 52.558 | 21.164 | 28.803 | 11.905 | 37.844 | 38.88  | 12.531 | 76.8   | 29.528 | 48.912 | 52.156 | 45.328 | 48.445 | 22.015 | 15.077 | 21.672 | 53.749 | 13.615 | 34.392 |        |        |
| 24.263 | 30.015 | 42.578 | 22.298 | 34.03  | 22.857 | 17.005 | 27.807 | 26.279 | 8.617  | 23.473 | 32.436 | 64.236 | 52.632 | 37.037 | 30.423 | 22.765 | 26.04  | 18.012 | 60.749 | 25.414 | 24.793 | 26.351 | 36.183 |        |        |
| 11.79  | 77.342 | 55.474 | 17.346 | 63.492 | 39.798 | 14.328 | 36.648 | 17.014 | 27.15  | 35.949 | 56.878 | 51.303 | 40.062 | 43.712 | 25.369 | 49.831 | 30.411 | 24.256 | 51.593 | 21.222 | 14.148 | 32.556 | 28.678 |        |        |
| 13.609 | 52.825 | 68.491 | 31.71  | 31.801 | 35.633 | 28.99  | 31.737 | 38.485 | 56.628 | 40.767 | 23.97  | 62.267 | 46.083 | 50.281 | 37.746 | 57.467 | 10.774 | 40.219 | 40.09  | 11.905 | 13.228 | 17.703 | 22.058 |        |        |
| 14.572 | 72.833 | 11.905 | 9.754  | 9.911  | 48.637 | 52.791 | 10.51  | 73.635 | 37.061 | 49.208 | 58.841 | 10.268 | 13.608 | 71.27  | 20.774 | 55.73  | 41.94  | 68.234 | 10.388 | 10.582 | 15.979 | 41.709 | 39.887 |        |        |
| 52.49  | 48.22  | 51.818 | 12.79  | 48.05  | 22     | 25.254 | 15.382 | 48.513 | 44.323 | 20.842 | 43.041 | 25.132 | 66.086 | 27.392 | 21.164 | 32.115 | 46.296 | 55.427 | 34.264 | 18.399 | 26.578 | 44.013 | 29.93  |        |        |
| 11.952 | 24.318 | 55.978 | 25.942 | 33.332 | 30.358 | 13.228 | 72.955 | 49.983 | 26.749 | 43.96  | 38.84  | 28.258 | 17.945 | 32.584 | 22.405 | 25.254 | 59.334 | 69.098 | 46.288 | 22.459 | 22.015 | 21.164 | 28.708 |        |        |
| 11.905 | 20.772 | 66.429 | 32.095 | 38.075 | 45.611 | 14.55  | 22.344 | 17.98  | 21.813 | 38.36  | 53.85  | 22.695 | 54.705 | 45.095 | 48.507 | 29.951 | 49.004 | 48.68  | 9.259  | 28.279 | 27.62  | 38.36  | 26.87  |        |        |
| 11.905 | 81.187 | 54.233 | 13.578 | 9.361  | 41.464 | 11.905 | 17.298 | 53.188 | 46.974 | 22.605 | 29.966 | 69.352 | 58.112 | 46.15  | 33.497 | 69.384 | 23.746 | 21.678 | 62.577 | 25.969 | 12.615 | 24.682 | 38.074 |        |        |
| 29.914 | 84.845 | 92.456 | 31.746 | 66.326 | 26.455 | 21.164 | 37.037 | 53.837 | 57.401 | 41.37  | 23.564 | 49.561 | 78.226 | 26.891 | 30.423 | 56.615 | 39.436 | 13.393 | 29.586 | 28.308 | 40.98  | 18.217 | 36.677 |        |        |
| 21.672 | 32.368 | 29.72  | 9.865  | 20.377 | 28.208 | 42.917 | 14.03  | 45.97  | 34.392 | 47.645 | 68.32  | 27.585 | 62.165 | 54.13  | 11.115 | 63.201 | 60.479 | 17.406 | 62.353 | 13.228 | 45.439 | 19.841 | 28.125 |        |        |
| 25.414 | 76.243 | 67.035 | 29.93  | 21.1   | 28.116 | 33.585 | 35.542 | 19.247 | 46.005 | 16.936 | 26.218 | 59.008 | 76.457 | 20.31  | 14.507 | 41.303 | 55.932 | 22.392 | 33.468 | 40.568 | 35.714 | 25.026 | 50.558 |        |        |
| 21.222 | 75.761 | 23.817 | 16.825 | 50.051 | 25.132 | 30.109 | 53.121 | 23.755 | 25.989 | 30.696 | 41.396 | 71.058 | 60.221 | 59.524 | 35.161 | 45.382 | 29.029 | 18.433 | 14.965 | 14.55  | 27.124 | 11.905 | 24.672 |        |        |
| 11.905 | 58.935 | 87.212 | 10.064 | 46.599 | 65.698 | 15.873 | 39.683 | 46.377 | 43.567 | 27.22  | 63.132 | 50.667 | 61.378 | 28.006 | 35.588 | 34.864 | 48.119 | 25.574 | 17.196 | 17.126 | 24.344 | 35.617 | 40.377 |        |        |
| 10.582 | 55.189 | 60.32  | 10.289 | 21.895 | 26.019 | 12.05  | 39.284 | 51.719 | 38.115 | 67.344 | 51.448 | 44.54  | 95.204 | 10.642 | 36.855 | 59.524 | 68.144 | 10.59  | 55.853 | 39.383 | 17.571 | 10.464 | 28.228 |        |        |
| 18.399 | 14.559 | 47.423 | 23.363 | 53.277 | 31.976 | 20.089 | 51.506 | 28.87  | 58.201 | 41.294 | 43.175 | 28.456 | 26.235 | 66.133 | 20.096 | 40.103 | 16.707 | 36.527 | 55.556 | 18.726 | 12.570 | 11.387 | 33.575 |        |        |
| 22.459 | 45.831 | 14.55  | 21.904 | 28.007 | 23.732 | 13.919 | 38.36  | 36.361 | 11.401 | 65.668 | 22.41  | 13.228 | 19.191 | 24.212 | 39.414 | 48.661 | 23.148 | 38.461 | 64.815 | 25.12  | 27.515 | 38.872 | 11.695 |        |        |
| 28.279 | 75.447 | 43.068 | 21.378 | 68.585 | 86.705 | 10.624 | 23.691 | 46.553 | 12.134 | 15.42  | 61.732 | 39.269 | 27.449 | 29.101 | 31.746 | 22.179 | 37.921 | 36.7   | 54.076 | 15.873 | 27.778 | 43.936 | 25.069 |        |        |
| 25.969 | 67.789 | 88.405 | 20.683 | 28.298 | 48.56  | 14.333 | 30.696 | 43.979 | 37.037 | 21.032 | 23.375 | 44.602 | 69.964 | 66.407 | 13.796 | 54.249 | 46.766 | 36.075 | 26.455 | 25.254 | 20.577 | 28.06  | 35.535 |        |        |
| 28.308 | 29.101 | 70.127 | 20.219 | 24.104 | 63.229 | 9.259  | 33.303 | 32.692 | 95.863 | 35.002 | 53.868 | 28.804 | 84.179 | 47.496 | 30.977 | 36.821 | 47.485 | 86.404 | 61.369 | 15.082 | 44.282 | 27.62  | 33.158 |        |        |
| 13.228 | 44.018 | 48.125 | 21.296 | 54.434 | 45.606 | 53.287 | 35.609 | 24.389 | 30.299 | 27.094 | 35.542 | 32.556 | 55.026 | 57.791 | 35.45  | 13.129 | 39.288 | 56.56  | 26.885 | 15.716 | 11.919 | 39.983 | 47.142 |        |        |
| 40.568 | 20.571 | 51.982 | 13.272 | 73.781 | 40.994 | 9.259  | 21.301 | 17.862 | 27.43  | 19.642 | 55.276 | 15.993 | 51.804 | 32.82  | 13.976 | 20.855 | 46.296 | 30.297 | 97.275 | 17.196 | 22.402 | 34.392 | 40.139 |        |        |
| 14.55  | 60.079 | 51.443 | 28.988 | 64.431 | 27.573 | 12.785 | 26.68  | 16.223 | 59.223 | 35.147 | 42.528 | 15.873 | 29.425 | 51.982 | 24.553 | 61.735 | 15.126 | 33.929 | 71.488 | 29.1   | 10.14  | 37.037 | 15.973 |        |        |
| 17.126 | 84.175 | 32.63  | 27.637 | 23.878 | 22.487 | 36.521 | 28.47  | 11.905 | 41.709 | 21.587 | 30.779 | 25.254 | 50.698 | 43.852 | 35.714 | 22.041 | 22.125 | 21.997 | 15.445 | 15.655 | 25.875 | 29.71  | 24.252 |        |        |
| 39.383 | 53.538 | 43.259 | 50.875 | 46.296 | 22.123 | 24.802 | 31.746 | 9.717  | 21.9   | 28.278 | 41.412 | 84.656 | 26.474 | 22.459 | 65.247 | 40.793 | 30.107 | 55.071 | 63.685 | 19.172 | 23.81  | 17.922 | 46.103 |        |        |
| 18.726 | 49.46  | 58.302 | 28.78  | 19.642 | 56.874 | 10.209 | 28.728 | 31.397 | 41.514 | 38.36  | 40.8   | 99.442 | 55.212 | 23.261 | 35.985 | 22.107 | 19.089 | 35.995 | 52.647 | 11.871 | 19.371 | 13.689 | 15.631 |        |        |
| 25.12  | 58.78  | 33.888 | 19.075 | 33.604 | 20.612 | 24.697 | 13.228 | 18.519 | 71.759 | 21.304 | 55.236 | 43.025 | 25.711 | 50.508 | 36.985 | 42.09  | 23.776 | 20.293 | 56.916 | 16.554 | 34.378 | 34.607 | 47.619 |        |        |
| 15.873 | 60.486 | 12.014 | 34.607 | 42.097 | 78.55  | 31.941 | 10.289 | 21.819 | 34.689 | 10.654 | 41.704 | 58.757 | 54.248 | 11.224 | 19.782 | 75.53  | 19.994 | 10.289 | 22.003 | 30.464 | 15.873 | 36.606 | 19.632 |        |        |
| 25.254 | 26.459 | 13.407 | 18.699 | 23.223 | 58.201 | 33.935 | 44.601 | 42.246 | 55.184 | 78.042 | 60.796 | 16.529 | 43.402 | 80.547 | 44.624 | 36.372 | 63.492 | 33.614 | 27.778 | 27.075 | 19.512 | 34.769 | 25.685 |        |        |
| 15.082 | 74.116 | 11.905 | 50.265 | 29.101 | 13.27  | 34.303 | 33.244 | 14.71  | 42.35  | 38.464 | 39.683 | 32.218 | 41.005 | 32.851 | 41.364 | 26.164 | 63.354 | 9.353  | 52.617 | 26.309 | 11.052 | 18.763 | 17.69  |        |        |
| 15.716 | 87.017 | 12.777 | 27.778 | 44.355 | 48.979 | 31.746 | 17.454 | 21.709 | 57.133 | 39.986 | 74.582 | 32.865 | 54.559 | 26.357 | 43.651 | 51.608 | 13.095 | 19.994 | 48.661 | 27.629 | 38.36  | 19.841 | 59.969 |        |        |
| 17.196 | 7.784  | 15.873 | 27.124 | 9.787  | 11.092 | 17.196 | 21.283 | 31.801 | 11.905 | 43.353 | 37.157 | 67.46  | 79.12  | 44.741 | 43.61  | 42.616 | 67.605 | 12.117 | 79.126 | 9.259  | 39.872 | 41.04  | 34.32  |        |        |
| 29.1   | 95.005 | 19.841 | 12.425 | 67.955 | 33.276 | 7.937  | 51.597 | 22.125 | 21.317 | 27.273 | 34.558 | 70.139 | 79.395 | 13.629 | 11.905 | 67.115 | 69.86  | 52.961 | 28.726 | 31.89  | 17.558 | 13.578 | 28.458 |        |        |
| 1      |        |        |        |        |        |        |        |        |        |        |        |        |        |        |        |        |        |        |        |        |        |        |        |        |        |

|        |        |        |        |        |        |        |        |        |        |        |        |        |        |        |        |        |        |        |        |        |        |        |        |  |  |
|--------|--------|--------|--------|--------|--------|--------|--------|--------|--------|--------|--------|--------|--------|--------|--------|--------|--------|--------|--------|--------|--------|--------|--------|--|--|
| 26.189 | 59.036 | 14.003 | 14.442 | 18.519 | 70.08  | 31.145 | 33.82  | 41.195 | 60.796 | 45.536 | 36.594 | 76.698 | 79.365 | 43.188 | 43.634 | 70.232 | 46.466 | 32.821 | 43.651 | 26.092 | 20.376 | 14.55  | 56.287 |  |  |
| 11.905 | 48.748 | 15.873 | 34.392 | 16.548 | 31.87  | 37.037 | 40.366 | 42.328 | 29.101 | 26.455 | 48.942 | 44.376 | 25.132 | 17.635 | 33.482 | 83.755 | 64.031 | 52.744 | 50.617 | 20.577 | 35.683 | 39.787 | 26.945 |  |  |
| 9.461  | 13.797 | 26.139 | 19.841 | 52.021 | 37.108 | 8.932  | 13.022 | 32.195 | 76.44  | 36.161 | 35.548 | 29.758 | 11.787 | 38.703 | 13.388 | 68.065 | 48.261 | 38.36  | 43.401 | 11.129 | 30.5   | 12.833 | 33.439 |  |  |
| 23.81  | 45.869 | 33.069 | 35.915 | 33.529 | 32.799 | 20.384 | 39.5   | 49.778 | 52.386 | 25.175 | 62.169 | 20.094 | 47.308 | 11.231 | 44.599 | 49.2   | 42.328 | 31.123 | 54.233 | 24.318 | 19.222 | 12.159 | 29.133 |  |  |
| 25.934 | 70.149 | 12.854 | 29.395 | 42.131 | 79.921 | 15.796 | 27.507 | 13.593 | 25.132 | 47.619 | 39.562 | 37.796 | 61.65  | 54.893 | 12.912 | 52.91  | 64.364 | 39.028 | 30.837 | 35.194 | 39.199 | 17.58  | 44.269 |  |  |
| 12.425 | 46.737 | 15.389 | 7.753  | 12.189 | 46.737 | 35.155 | 29.983 | 25.132 | 31.564 | 34.028 | 49.471 | 33.026 | 63.5   | 37.567 | 29.452 | 40.492 | 33.255 | 57.235 | 12.484 | 24.977 | 40.828 | 67.46  | 61.406 |  |  |
| 17.196 | 25.064 | 41.288 | 25.132 | 11.097 | 81.919 | 23.068 | 33.4   | 46.431 | 43.247 | 48.068 | 31.7   | 56.671 | 43.391 | 21.164 | 10.284 | 39.774 | 21.989 | 67.763 | 43.33  | 21.759 | 18.736 | 19.45  | 50.235 |  |  |
| 22.715 | 17.955 | 42.027 | 17.655 | 31.628 | 64.842 | 43.186 | 26.281 | 27.118 | 14.438 | 26.496 | 55.429 | 11.076 | 42.006 | 46.398 | 36.27  | 50.65  | 76.475 | 44.513 | 49.46  | 10.214 | 25.094 | 17.332 | 11.843 |  |  |
| 24.186 | 38.837 | 25.881 | 15.592 | 13.891 | 10.582 | 62.715 | 13.228 | 17.9   | 49.342 | 19.077 | 52.217 | 72.625 | 49.928 | 60.792 | 42.619 | 14.225 | 26.455 | 51.906 | 60.508 | 22.448 | 73.566 | 24.317 | 19.255 |  |  |
| 40.37  | 13.741 | 26.741 | 25.443 | 31.538 | 28.462 | 39.667 | 22.487 | 27.124 | 45.33  | 12.159 | 51.889 | 22.977 | 94.811 | 92.107 | 19.841 | 61.732 | 52.885 | 22.487 | 62.838 | 31.126 | 14.469 | 23.81  | 10.351 |  |  |
| 32.186 | 16.343 | 44.974 | 14.088 | 29.248 | 27.927 | 15.067 | 51.253 | 24.127 | 23.623 | 17.074 | 30.357 | 64.031 | 25.78  | 52.66  | 34.4   | 51.479 | 29.101 | 56.264 | 52.129 | 10.27  | 31.746 | 22.802 | 31.191 |  |  |
| 20.028 | 16.52  | 26.75  | 35.167 | 15.74  | 17.698 | 47.702 | 14.55  | 39.399 | 50.265 | 53.616 | 48.006 | 84.018 | 37.037 | 74.425 | 35.201 | 26.206 | 37.037 | 58.548 | 20.331 | 10.464 | 19.841 | 25.969 | 36.761 |  |  |
| 26.092 | 32.432 | 14.55  | 12.497 | 19.841 | 11.905 | 18.519 | 16.263 | 38.121 | 48.785 | 59.989 | 61.754 | 68.983 | 38.437 | 30.127 | 21.164 | 78.273 | 39.699 | 42.606 | 26.406 | 23.383 | 13.018 | 26.677 | 15.128 |  |  |
| 20.577 | 52.144 | 17.196 | 13.578 | 39.366 | 53.583 | 41.005 | 12.399 | 18.117 | 15.566 | 41.884 | 45.635 | 73.938 | 94.295 | 16.873 | 17.75  | 57.175 | 78.623 | 41.398 | 68.343 | 12.706 | 17.771 | 59.857 | 13.553 |  |  |
| 24.267 | 39.087 | 12.863 | 21.819 | 18.519 | 21.164 | 11.905 | 44.923 | 21.026 | 61.863 | 39.521 | 59.405 | 45.592 | 66.781 | 11.196 | 25.853 | 47.831 | 49.465 | 19.202 | 61.93  | 9.197  | 17.151 | 35.283 | 12.852 |  |  |
| 11.129 | 20.286 | 14.301 | 23.079 | 26.313 | 11.387 | 13.575 | 29.933 | 19.642 | 26.357 | 20.767 | 59.861 | 33.755 | 76.51  | 71.187 | 50.136 | 82.551 | 49.671 | 18.519 | 20.535 | 14.965 | 33.663 | 40.353 | 29.196 |  |  |
| 24.318 | 32.891 | 36.978 | 31.077 | 24.721 | 27.43  | 20.169 | 15.985 | 61.921 | 51.469 | 33.939 | 36.847 | 57.821 | 29.812 | 79.764 | 33.965 | 35.337 | 51.587 | 15.536 | 37.413 | 20.117 | 18.519 | 15.901 | 29.023 |  |  |
| 35.194 | 30.477 | 18.457 | 19.841 | 21.492 | 11.816 | 31.771 | 30.696 | 27.913 | 34.026 | 16.612 | 70.949 | 72.242 | 50.279 | 53.378 | 33.693 | 43.202 | 46.269 | 81.333 | 11.719 | 23.81  | 25.132 | 24.276 | 27.307 |  |  |
| 24.977 | 69.5   | 15.873 | 27.762 | 66.662 | 43.995 | 16.747 | 51.779 | 17.883 | 11.905 | 27.231 | 22.029 | 72.844 | 25.254 | 71.651 | 30.214 | 50.577 | 57.055 | 40.771 | 59.488 | 15.6   | 13.839 | 50.263 | 20.785 |  |  |
| 21.759 | 22.487 | 21.305 | 33.672 | 35.142 | 31.801 | 30.055 | 41.664 | 56.71  | 42.156 | 35.24  | 57.875 | 21.164 | 84.711 | 35.534 | 11.271 | 46.147 | 10.582 | 7.713  | 22.174 | 39.357 | 23.669 | 19.841 | 38.36  |  |  |
| 10.214 | 38.36  | 29.101 | 31.236 | 54.206 | 15.117 | 66.516 | 24.913 | 9.014  | 54.213 | 66.138 | 46.474 | 43.105 | 11.987 | 38.879 | 32.458 | 15.402 | 51.71  | 48.354 | 9.239  | 31.878 | 13.839 | 76.72  |        |  |  |
| 22.448 | 10.582 | 56.922 | 21.206 | 53.995 | 30.178 | 23.273 | 24.948 | 25.576 | 47.36  | 32.098 | 45.775 | 27.778 | 37.001 | 54.502 | 16.654 | 54.129 | 27.182 | 22.452 | 16.409 | 19.128 | 21.688 | 25.132 | 23.085 |  |  |
| 12.706 | 23.079 | 32.449 | 13.228 | 15.429 | 33.897 | 41.209 | 30.959 | 31.686 | 38.1   | 29.101 | 12.176 | 27.477 | 27.788 | 39.837 | 54.076 | 69.352 | 17.196 | 15.8   | 65.385 | 11.151 | 12.431 | 24.551 | 41.946 |  |  |
| 31.126 | 12.428 | 21.594 | 28.594 | 34.021 | 33.069 | 43.756 | 74.032 | 13.228 | 55.429 | 60.028 | 20.6   | 22.448 | 57.045 | 29.101 | 18.162 | 50.408 | 15.897 | 17.698 | 83.735 | 13.585 | 31.296 | 14.55  | 20.538 |  |  |
| 10.27  | 15.873 | 10.537 | 42.042 | 21.915 | 23.81  | 27.196 | 16.965 | 13.228 | 51.587 | 45.966 | 33.883 | 46.402 | 71.717 | 11.397 | 24.521 | 33.069 | 51.587 | 27.65  | 27.084 | 12.159 | 52.14  | 40.597 | 55.179 |  |  |
| 10.464 | 21.936 | 22.459 | 18.604 | 34.607 | 51.113 | 29.145 | 14.176 | 23.81  | 65.429 | 39.044 | 56.396 | 23.616 | 55.332 | 66.724 | 45.72  | 43.878 | 36.394 | 32.493 | 54.15  | 32.916 | 18.603 | 31.321 | 18.707 |  |  |
| 23.383 | 17.75  | 29.101 | 44.896 | 41.785 | 41.005 | 41.67  | 26.195 | 31.136 | 61.124 | 27.436 | 50.168 | 71.114 | 52.811 | 33.069 | 25.777 | 17.97  | 43.651 | 55.51  | 38.558 | 38.341 | 14.209 | 46.541 | 26.73  |  |  |
| 12.706 | 33.069 | 22.314 | 26.633 | 29.101 | 18.134 | 25.132 | 78.225 | 45.102 | 54.647 | 15.049 | 64.14  | 66.669 | 59.954 | 66.195 | 27.956 | 17.617 | 18.134 | 20.577 | 30.499 | 26.065 | 23.696 | 25.443 | 27.528 |  |  |
| 9.197  | 34.392 | 43.347 | 14.461 | 19.481 | 11.387 | 10.582 | 36.599 | 29.285 | 51.587 | 41.005 | 38.765 | 30.55  | 14.159 | 47.503 | 31.976 | 43.62  | 58.797 | 20.954 | 33.387 | 8.87   | 20.5   | 11.838 | 19.298 |  |  |
| 14.965 | 33.884 | 18.519 | 31.267 | 75.839 | 23.81  | 23.88  | 16.616 | 24.318 | 27.224 | 29.796 | 56.867 | 70.111 | 18.18  | 11.316 | 33.37  | 31.865 | 36.499 | 27.692 | 49.022 | 24.78  | 26.89  | 10.582 | 16.591 |  |  |
| 20.117 | 30.788 | 15.546 | 22.115 | 28.06  | 29.521 | 48.452 | 20.577 | 50.508 | 27.217 | 58.26  | 43.783 | 17.405 | 49.398 | 75.034 | 42.328 | 31.04  | 51.443 | 15.994 | 37.277 | 51.276 | 13.228 | 81.539 | 30.421 |  |  |
| 23.81  | 10.891 | 28.545 | 24.974 | 30.071 | 36.292 | 42.328 | 61.88  | 14.03  | 39.944 | 30.777 | 32.657 | 18.113 | 59.22  | 27.201 | 35.789 | 48.017 | 25.773 | 20.577 | 32.233 | 20.668 | 22.487 | 62.052 | 19.874 |  |  |
| 15.6   | 31.821 | 24.675 | 44.168 | 8.035  | 18.986 | 13.228 | 39.709 | 15.901 | 36.09  | 31.348 | 32.542 | 32.685 | 82.149 | 57.829 | 16.734 | 22.229 | 59.424 | 25.96  | 34.392 | 16.244 | 15.873 | 11.982 | 17.196 |  |  |
| 39.357 | 37.037 | 10.295 | 23.974 | 45.193 | 43.395 | 14.799 | 15.497 | 9.258  | 37.846 | 30.552 | 8.13   | 80.672 | 44.973 | 82.011 | 26.142 | 38.82  | 31.746 | 15.648 | 31.613 | 10.357 | 29.12  | 11.905 | 18.08  |  |  |
| 9.239  | 13.919 | 57.019 | 28.071 | 44.442 | 33.672 | 48.687 | 27.196 | 22.691 | 32.093 | 30.178 | 45.98  | 44.285 | 39.161 | 24.259 | 45.332 | 39.683 | 68.99  | 34.392 | 63.907 | 14.356 | 12.289 | 37.86  | 25.378 |  |  |
| 19.128 | 29.361 | 26.455 | 33.069 | 27.811 | 9.522  | 39.552 | 29.251 | 38.231 | 7.951  | 48.237 | 32.322 | 33.71  | 20.461 | 35.448 | 41.848 | 52.525 | 76.72  | 31.746 | 56.863 | 16.188 | 39.638 | 23.81  | 26.626 |  |  |
| 11.151 | 14.538 | 24.532 | 16.496 | 18.2   | 21.394 | 16.064 | 30.803 | 37.63  | 11.299 | 34.269 | 28.93  | 35.417 | 53.957 | 85.441 | 37.413 | 27.691 | 54.446 | 24.044 | 45.538 | 12.431 | 27.124 | 13.608 | 19.642 |  |  |
| 13.585 | 53.129 | 11.224 | 18.299 | 16.568 | 27.674 | 37.466 | 20.577 | 17.078 | 80.607 | 42.994 | 21.681 | 18.264 | 27.622 | 44.226 | 25.132 | 33.231 | 46.394 | 43.839 | 59.708 | 26.117 | 37.158 | 43.883 | 17.581 |  |  |
| 12.159 | 14.696 | 35.168 | 22.487 | 69.471 | 25.837 | 19.445 | 52.162 | 34.659 | 37.789 | 10.057 | 54.079 | 41.843 | 56.385 | 12.457 | 15.722 | 60.646 | 23.81  | 18.608 | 37.913 | 15.901 | 27.778 | 12.428 | 55.322 |  |  |
| 32.916 | 22.229 | 44.688 | 10.077 | 77.487 | 62.282 | 17.531 | 26.455 | 21.635 | 31.656 | 22.487 | 50.508 | 42.488 | 42.328 | 31.721 | 19.647 | 36.253 | 32.877 | 36.063 | 65.512 | 15.076 | 15.166 | 41.313 | 26.471 |  |  |
| 38.341 | 35.312 | 18.186 | 39.589 | 45.834 | 32.619 | 11.224 | 31.415 | 20.577 | 46.27  | 40.598 | 55.386 | 34.001 | 12.157 | 66.723 | 19.841 | 25.958 | 17.912 | 29.71  | 65.309 | 39.436 | 34.392 | 13.195 | 21.164 |  |  |
| 26.065 | 53.749 | 70.665 | 53.244 | 41.211 | 42.896 | 30.887 | 32.525 | 48.406 | 22.448 | 34.66  | 35.532 | 35.738 | 42.235 | 36.503 | 30.059 | 49.956 | 38.36  | 51.526 | 31.979 | 12.758 | 22.487 | 27.434 | 17.196 |  |  |
| 8.87   | 31.746 | 22.576 | 27.333 | 16.745 | 49.171 | 38.07  | 39.308 | 25.494 | 36.103 | 37.083 | 39.678 | 26.189 | 49.676 | 7.266  | 47.878 | 45.901 | 46.017 | 48.942 | 49.703 | 32.07  | 25.074 | 44.899 | 22.578 |  |  |
| 24.78  | 29.248 | 55.786 | 17.16  | 25.608 | 22.754 | 22.877 | 44.415 | 17.227 | 35.493 | 42.061 | 42.613 | 17.427 | 52.91  | 50.737 | 37.037 | 68.582 | 33.132 | 47.991 | 62.574 | 49.572 | 28.581 | 42.589 | 31.746 |  |  |
| 51.276 | 27.085 | 34.864 | 8.418  | 42.556 | 28.56  | 27.593 | 38.17  | 31.567 | 40.747 | 22.487 | 46.296 | 14.524 | 52.389 | 23.81  | 39.683 | 43.655 | 21.089 | 11.551 | 19.285 | 33.666 | 25.676 | 33.373 | 18.313 |  |  |
| 20.668 | 25.132 | 23.085 | 27     |        |        |        |        |        |        |        |        |        |        |        |        |        |        |        |        |        |        |        |        |  |  |

|        |        |        |        |        |        |        |        |        |        |        |        |  |  |  |        |        |        |        |        |        |        |        |  |  |
|--------|--------|--------|--------|--------|--------|--------|--------|--------|--------|--------|--------|--|--|--|--------|--------|--------|--------|--------|--------|--------|--------|--|--|
| 24.856 | 28.633 | 18.394 | 40.864 | 39.159 | 45.517 | 35.644 | 42.268 | 13.601 | 48.247 | 43.093 | 34.854 |  |  |  | 69.079 | 33.672 | 17.156 | 47.415 | 31.746 | 47.674 | 23.81  | 37.037 |  |  |
| 32.679 | 19.901 | 30.658 | 27.124 | 52.568 | 24.155 | 43.92  | 13.798 | 13.778 | 14.875 | 30.449 | 38.36  |  |  |  | 57.121 | 34.003 | 35.714 | 21.099 | 9.865  | 17.912 | 11.905 | 29.361 |  |  |
| 27.692 | 35.2   | 28.048 | 13.228 | 36.243 | 28.314 | 21.653 | 34.494 | 33.219 | 11.161 | 46.207 | 14.409 |  |  |  | 18.264 | 15.336 | 64.719 | 53.314 | 29.93  | 20.299 | 11.63  | 14.538 |  |  |
| 40.204 | 24.692 | 37.664 | 28.306 | 40.62  | 13.095 | 23.077 | 18.608 | 14.765 | 41.298 | 38.391 | 38.481 |  |  |  | 69.169 | 54.89  | 43.662 | 17.984 | 16.825 | 27.03  | 13.578 | 53.129 |  |  |
| 24.786 | 45.215 | 33.974 | 21.164 | 30.357 | 31.495 | 21.637 | 18.595 | 16.903 | 40.36  | 19.29  | 36.121 |  |  |  | 44.896 | 49.729 | 19.524 | 46.781 | 10.064 | 26.189 | 31.956 | 14.696 |  |  |
| 55.556 | 28.995 | 40.69  | 23.669 | 62.849 | 36.357 | 31.518 | 22.167 | 40.529 | 48.708 | 39.627 | 30.146 |  |  |  | 50.173 | 51.728 | 35.21  | 22.002 | 10.289 | 13.594 | 19.097 | 22.229 |  |  |
| 22.488 | 8.081  | 11.244 | 20.913 | 28.83  | 32.651 | 54.249 | 22.589 | 26.455 | 37.828 | 21.164 | 40.539 |  |  |  | 49.591 | 13.228 | 59.276 | 49.051 | 23.363 | 14.03  | 19.871 | 35.312 |  |  |
| 27.54  | 27.778 | 33.49  | 37.799 | 13.881 | 53.222 | 33.512 | 53.26  | 43.757 | 25.695 | 47.319 | 46.832 |  |  |  | 51.898 | 23.367 | 12.431 | 24.75  | 21.904 | 19.527 | 56.781 | 53.749 |  |  |
| 47.509 | 18.817 | 10.54  | 49.34  | 16.31  | 36.165 | 8.094  | 50.191 | 35.382 | 74.857 | 36.984 | 63.946 |  |  |  | 52.468 | 40.711 | 62.127 | 26.189 | 21.378 | 22.448 | 17.196 | 31.746 |  |  |
| 37.874 | 23.193 | 28.154 | 13.228 | 36.732 | 19.464 | 43.615 | 22.963 | 42.627 | 8.824  | 16.444 | 39.962 |  |  |  | 47.619 | 24.219 | 38.335 | 34.769 | 20.683 | 19.841 | 15.873 | 29.248 |  |  |
| 40.522 | 33.192 | 33.672 | 26.053 | 28.042 | 25.999 | 10.582 | 43.519 | 19.394 | 16.829 | 37.037 | 39.683 |  |  |  | 43.444 | 10.522 | 28.647 | 42.211 | 20.219 | 18.519 | 15.681 | 27.085 |  |  |
| 44.346 | 31.952 | 30.337 | 20.047 | 65.391 | 47.691 | 10.884 | 30.115 | 38.905 | 21.164 | 21.164 | 46.296 |  |  |  | 56.389 | 45.104 | 48.177 | 41.057 | 21.296 | 20.448 | 11.905 | 25.132 |  |  |
| 53.005 | 23.81  | 12.691 | 30.381 | 39.502 | 15.049 | 20.582 | 28.274 | 17.196 | 55.377 | 29.16  | 23.373 |  |  |  | 37.608 | 48.438 | 51.499 | 28.87  | 13.272 | 17.424 | 26.251 | 34.154 |  |  |
| 50.051 | 13.045 | 27.552 | 61.952 | 30.641 | 38.656 | 22.856 | 23.81  | 16.708 | 28.809 | 15.438 | 25.535 |  |  |  | 65.332 | 60.133 | 47.702 | 21.891 | 28.988 | 31.276 | 23.552 | 64.302 |  |  |
| 33.274 | 11.31  | 28.803 | 34.646 | 33.004 | 24.573 | 35.876 | 16.527 | 28.27  | 37.57  | 10.887 | 66.226 |  |  |  | 33.756 | 23.81  | 19.841 | 54.717 | 27.637 | 18.926 | 18.902 | 27.175 |  |  |
| 35.714 | 27.191 | 50.265 | 24.965 | 20.439 | 25.39  | 24.256 | 35.714 | 10.46  | 15.405 | 23.383 | 45.778 |  |  |  | 19.85  | 36.658 | 47.118 | 25.865 | 50.875 | 27.647 | 53.16  | 25.993 |  |  |
| 7.563  | 22.146 | 14.118 | 24.318 | 19.524 | 57.646 | 24.062 | 30.833 | 56.521 | 38.354 | 10.657 | 48.822 |  |  |  | 17.196 | 22.392 | 71.588 | 39.284 | 19.075 | 22.109 | 24.46  | 30.197 |  |  |
| 48.637 | 22.386 | 32.052 | 13.615 | 13.543 | 28.725 | 22.748 | 21.271 | 9.675  | 18.519 | 41.856 | 51.857 |  |  |  | 32.669 | 19.841 | 49.488 | 17.224 | 34.607 | 15.661 | 38.36  | 23.81  |  |  |
| 35.593 | 13.228 | 36.097 | 15.873 | 34.884 | 35.347 | 56.615 | 72.248 | 25.132 | 38.249 | 16.862 | 60.531 |  |  |  | 33.492 | 79.254 | 51.587 | 22.448 | 18.699 | 17.156 | 53.764 | 15.663 |  |  |
| 24.682 | 20.65  | 18.406 | 39.284 | 42.881 | 45.698 | 28.561 | 65.384 | 17.363 | 44.015 | 48.535 | 51.048 |  |  |  | 23.934 | 26.474 | 50.757 | 46.663 | 50.265 | 30.421 | 34.362 | 33.939 |  |  |
| 23.81  | 25.132 | 25.638 | 15.301 | 16.836 | 43.03  | 14.03  | 55.556 | 49.301 | 71.183 | 20.09  | 66.708 |  |  |  | 55.836 | 26.603 | 69.836 | 39.535 | 27.778 | 26.455 | 34.848 | 38.419 |  |  |
| 15.838 | 21.874 | 10.289 | 17.137 | 44.263 | 45.57  | 29.754 | 50.852 | 26.946 | 43.673 | 26.455 | 46.729 |  |  |  | 16.017 | 13.228 | 41.01  | 59.678 | 27.124 | 11.905 | 23.383 | 34.607 |  |  |
| 26.455 | 33.755 | 32.271 | 30.952 | 31.129 | 42.859 | 52.404 | 26.455 | 48.748 | 17.196 | 28.143 | 19.728 |  |  |  | 20.577 | 26.455 | 32.367 | 36.141 | 12.425 | 45.212 | 17.339 | 40.783 |  |  |
| 54.217 | 32.083 | 33.729 | 43.358 | 37.451 | 14.538 | 24.686 | 40.447 | 20.958 | 29.633 | 41.966 | 22.621 |  |  |  | 58.205 | 15.392 | 13.155 | 13.618 | 25.339 | 44.974 | 47.2   | 22.804 |  |  |
| 57.413 | 31.128 | 24.586 | 26.202 | 36.847 | 30.098 | 11.642 | 13.966 | 13.615 | 15.858 | 62.169 | 46.844 |  |  |  | 17.922 | 33.108 | 34.392 | 43.321 | 23.529 | 22.827 | 15.873 | 24.77  |  |  |
| 26.026 | 29.836 | 19.383 | 16.523 | 33.069 | 19.575 | 25.043 | 15.392 | 28.323 | 26.036 | 27.778 | 52.327 |  |  |  | 24.744 | 21.63  | 23.085 | 49.968 | 29.984 | 15.873 | 11.251 | 24.815 |  |  |
| 13.552 | 29.101 | 26.43  | 42.57  | 59.861 | 45.561 | 46.436 | 79.42  | 11.424 | 33.008 | 14.413 | 26.942 |  |  |  | 47.938 | 47.954 | 40.845 | 61.098 | 11.871 | 42.899 | 22.462 | 20.498 |  |  |
| 24.965 | 26.69  | 20.777 | 25.986 | 69.67  | 54.233 | 47.619 | 63.687 | 12.399 | 38.114 | 38.36  | 44.854 |  |  |  | 48.324 | 41.824 | 54.7   | 66.662 | 14.55  | 15.382 | 17.771 | 26.474 |  |  |
| 41.682 | 59.252 | 37.037 | 20     | 36.631 | 64.758 | 38.529 | 23.082 | 28.745 | 42.626 | 27.699 | 58.882 |  |  |  | 44.974 | 48.25  | 32.37  | 47.935 | 18.134 | 18.519 | 57.448 | 47.691 |  |  |
| 28.556 | 23.783 | 23.737 | 24.406 | 20.08  | 16.739 | 37.037 | 37.891 | 46.296 | 36.478 | 22.044 | 23.81  |  |  |  | 40.61  | 30.633 | 37.802 | 51.587 | 10.538 | 14.55  | 39.683 | 23.03  |  |  |
| 37.284 | 25.26  | 13.127 | 41.928 | 47.285 | 39.084 | 56.049 | 54.151 | 33.604 | 62.57  | 24.869 | 37.656 |  |  |  | 20.769 | 30.065 | 49.793 | 39.399 | 35.231 | 29.922 | 17.353 | 19.729 |  |  |
| 22.921 | 52.216 | 20.845 | 40.754 | 14.465 | 31.273 | 50.265 | 26.553 | 25.009 | 25.989 | 39.502 | 29.021 |  |  |  | 11.052 | 63.756 | 52.91  | 33.494 | 29.661 | 11.905 | 19.685 | 42.654 |  |  |
| 24.295 | 22.639 | 30.464 | 54.266 | 34.925 | 50.101 | 40.848 | 58.565 | 52.046 | 31.746 | 32.655 | 46.747 |  |  |  | 35.236 | 63.127 | 36.005 | 27.525 | 10.045 | 19.45  | 13.22  | 9.549  |  |  |
| 23.81  | 20.62  | 37.868 | 55.46  | 20.577 | 68.602 | 49.317 | 23.471 | 18.539 | 11.294 | 27.899 | 42.255 |  |  |  | 23.81  | 15.487 | 25.645 | 48.894 | 22.035 | 29.785 | 47.915 | 15.862 |  |  |
| 44.28  | 17.295 | 33.005 | 33.357 | 29.021 | 37.62  | 47.401 | 42.779 | 42.302 | 60.335 | 29.997 | 52.136 |  |  |  | 53.1   | 52.02  | 23.409 |        | 19.243 | 15.644 | 18.937 | 32.234 |  |  |
| 28.265 | 31.936 | 70.93  | 22.487 | 13.018 | 56.12  | 46.41  | 25.946 | 10.656 | 66.784 | 30.684 | 62.566 |  |  |  | 15.787 | 12.031 | 39.625 |        | 9.474  | 16.356 | 23.383 | 28.633 |  |  |
| 70.56  | 23.382 | 48.626 | 23.332 | 38.515 | 27.223 | 31.117 | 17.196 | 21.339 | 9.736  | 23.489 | 43.585 |  |  |  | 28.417 | 45.327 | 17.408 |        | 24.467 | 16.499 | 24.511 | 19.901 |  |  |
| 21.344 | 8.21   | 39.683 | 21.023 | 56.688 | 25.178 | 20.454 | 24.51  | 48.877 | 46.766 | 21.164 | 34.392 |  |  |  | 35.032 | 19.642 | 58.722 |        | 21.967 | 11.76  | 15.873 | 35.2   |  |  |
| 24.58  | 74.667 | 59.51  | 38.658 | 28.047 | 42.292 | 25.799 | 30.847 | 19.862 | 44.866 | 55.253 | 32.781 |  |  |  | 30.423 | 63.061 | 22.376 |        | 46.489 | 25.055 | 25.132 | 24.692 |  |  |
| 29.302 | 60.44  | 22.487 | 24.588 | 50.79  | 22.487 | 17.771 | 45.518 | 20.553 | 62.133 | 29.388 | 39.214 |  |  |  | 20.667 | 14.55  | 69.517 |        | 24.958 | 13.228 | 26.306 | 45.215 |  |  |
| 37.067 | 27.106 | 31.746 | 33.989 | 16.609 | 26.455 | 20.689 | 17.729 | 30.866 | 46.691 | 33.98  | 43.588 |  |  |  | 15.951 | 18.519 | 18.519 |        | 20.453 | 23.777 | 19.091 | 28.995 |  |  |
| 38.255 | 27.155 | 14.855 | 43.186 | 36.571 | 28.252 | 21.164 | 25.172 | 24.418 | 59.809 | 28.638 | 50.922 |  |  |  | 24.272 | 22.097 | 50.265 |        | 21.164 | 12.435 | 32.402 | 8.081  |  |  |
| 48.549 | 32.457 | 44.974 | 19.737 | 93.105 | 53.628 | 17.593 | 33.069 | 21.164 | 39.308 | 16.736 | 72.955 |  |  |  |        |        |        |        | 48.523 | 27.528 | 28.843 | 27.778 |  |  |
| 17.402 | 19.841 | 27.124 | 18.519 | 88.45  | 17.196 | 14.55  | 28.995 | 23.422 | 35.601 | 30.164 | 55.471 |  |  |  |        |        |        |        | 19.841 | 51.384 | 47.619 | 18.817 |  |  |
| 47.136 | 16.688 | 42.579 | 15.873 | 14.55  | 58.578 | 23.81  | 10.891 | 29.101 | 62.086 | 51.915 | 52.94  |  |  |  |        |        |        |        | 26.044 | 30.333 | 13.612 | 23.193 |  |  |
| 29.396 | 34.424 | 31.533 |        | 35.007 | 16.624 | 35.058 | 36.396 | 16.512 | 31.159 | 30.814 | 42.744 |  |  |  |        |        |        |        | 8.949  | 27.406 | 13.228 | 33.192 |  |  |
| 36.988 | 35.249 | 39.194 |        | 17.196 | 39.375 | 42.589 | 30.404 | 18.519 | 36.373 | 38.024 | 70.245 |  |  |  |        |        |        |        | 20.212 | 28.031 | 13.095 | 31.952 |  |  |
| 13.46  | 11.905 | 15.443 |        | 35.951 | 18.235 | 30.106 | 50.768 | 45.718 | 37.037 | 11.905 | 51.019 |  |  |  |        |        |        |        | 44.767 | 22.487 | 12.822 | 23.81  |  |  |
| 27.778 | 11.8   | 8.375  |        | 20.284 | 32.572 | 11.092 | 53.006 | 50.938 | 40.612 | 49.131 | 18.833 |  |  |  |        |        |        |        | 22.362 | 37.995 | 34.392 | 13.045 |  |  |
| 9.259  | 21.724 | 14.55  |        | 41.897 | 52.91  | 22.737 | 40.178 | 39.034 | 30.091 | 37.76  | 30.151 |  |  |  |        |        |        |        | 14.442 | 18.707 | 12.356 | 11.31  |  |  |
| 21.135 | 23.188 | 24.269 |        | 24.745 | 27.073 | 25.686 | 54.178 | 21.179 | 40.994 | 31.039 | 48.529 |  |  |  |        |        |        |        | 34.392 | 30.866 | 41.696 | 27.191 |  |  |
| 32.208 | 13.609 | 62.016 |        | 34.316 | 31.353 | 31.358 | 9.259  | 13.095 | 48.637 | 27.35  | 39.923 |  |  |  |        |        |        |        | 19.841 | 23.313 | 21.164 | 22.146 |  |  |
| 14.792 | 52.477 | 24.167 |        | 24.763 | 54.511 | 21.836 | 41.288 | 15.161 | 34.423 | 25.65  | 1      |  |  |  |        |        |        |        |        |        |        |        |  |  |











21 days following freeze injury

| Ile #2 | Pax7-M10cKc |        |        |         |         |           |          |        |        |        |           |        |        |        |        |           |        |        |        |        |           |        |        |        |        |           |  |  |  |
|--------|-------------|--------|--------|---------|---------|-----------|----------|--------|--------|--------|-----------|--------|--------|--------|--------|-----------|--------|--------|--------|--------|-----------|--------|--------|--------|--------|-----------|--|--|--|
|        | Muscle #3   |        |        |         |         | Muscle #4 |          |        |        |        | Muscle #5 |        |        |        |        | Muscle #6 |        |        |        |        | Muscle #7 |        |        |        |        | Muscle #8 |  |  |  |
|        | 62.746      | 60.796 | 67.816 | 58.201  | 37.501  | 49.256    | 40.705   | 50.051 | 27.778 | 10.582 | 59.34     | 26.455 | 33.951 | 48.824 | 37.037 | 21.857    | 19.841 | 40.238 | 55.627 | 17.793 | 19.413    | 27.053 | 52.91  | 24.864 | 27.217 |           |  |  |  |
| 38.396 | 62.746      | 60.796 | 67.816 | 58.201  | 37.501  | 49.256    | 40.705   | 50.051 | 27.778 | 10.582 | 59.34     | 26.455 | 33.951 | 48.824 | 37.037 | 21.857    | 19.841 | 40.238 | 55.627 | 17.793 | 19.413    | 27.053 | 52.91  | 24.864 | 27.217 |           |  |  |  |
| 55.556 | 35.937      | 54.751 | 81.937 | 66.328  | 61.276  | 48.595    | 26.603   | 34.388 | 76.324 | 18.519 | 35.714    | 15.976 | 67.669 | 26.347 | 34.258 | 13.051    | 25.535 | 29.606 | 26.24  | 29.189 | 26.455    | 39.975 | 70.564 | 38.143 | 18.672 |           |  |  |  |
| 45.881 | 16.564      | 43.651 | 9.259  | 80.851  | 63.574  | 28.995    | 20.802   | 63.849 | 21.164 | 14.442 | 61.795    | 96.194 | 17.287 | 20.639 | 43.96  | 22.8      | 12.719 | 25.449 | 37.916 | 29.242 | 71.178    | 30.978 | 44.974 | 48.184 | 29.737 |           |  |  |  |
| 45.891 | 90.188      | 54.974 | 25.132 | 29.707  | 18.519  | 44.673    | 33.196   | 28.902 | 22.035 | 37.797 | 68.219    | 55.617 | 20.559 | 42.6   | 23.489 | 35.83     | 29.93  | 43.881 | 25.671 | 37.802 | 43.651    | 45.222 | 16.836 | 37.584 | 23.383 |           |  |  |  |
| 71.883 | 16.788      | 33.672 | 33.868 | 41.201  | 56.878  | 26.82     | 17.005   | 21.502 | 33.447 | 19.513 | 47.171    | 70.789 | 64.116 | 35.761 | 43.557 | 53.144    | 39.738 | 61.313 | 35.491 | 44.286 | 42.322    | 39.683 | 56.949 | 9.344  | 32.214 |           |  |  |  |
| 44.464 | 24.997      | 28.933 | 84.743 | 71.005  | 10.582  | 24.318    | 9.259    | 26.461 | 18.835 | 55.329 | 61.553    | 48.301 | 29.93  | 52.811 | 66.879 | 22.448    | 30.946 | 22.593 | 40.071 | 30.469 | 25.543    | 56.478 | 26.309 | 45.63  |        |           |  |  |  |
| 70.095 | 34.607      | 48.439 | 88.362 | 15.666  | 25.798  | 19.465    | 16.836   | 46.241 | 17.648 | 28.008 | 88.052    | 75.571 | 21.298 | 37.278 | 18.849 | 32.274    | 43.651 | 51.608 | 38.164 | 35.979 | 10.651    | 50.215 | 62.348 | 49.586 | 31.356 |           |  |  |  |
| 56.19  | 18.519      | 46.978 | 39.683 | 15.389  | 32.361  | 24.044    | 9.259    | 30.745 | 12.848 | 45.115 | 84.652    | 34.258 | 21.164 | 13.641 | 46.147 | 54.744    | 19.321 | 38.927 | 10.582 | 10.51  | 36.383    | 9.259  | 48.231 | 25.875 | 21.186 |           |  |  |  |
| 20.887 | 51.566      | 33.672 | 17.857 | 34.894  | 65.077  | 17.485    | 31.746   | 18.756 | 14.984 | 24.065 | 62.327    | 34.334 | 38.03  | 39.683 | 34.392 | 11.905    | 21.164 | 51.951 | 31.846 | 38.36  | 29.101    | 44.865 | 28.707 | 47.268 | 42.009 |           |  |  |  |
| 50.571 | 42.328      | 30.385 | 51.479 | 72.2    | 93.072  | 25.864    | 30.884   | 49.353 | 17.219 | 35.236 | 63.602    | 51.469 | 51.664 | 46.184 | 57.637 | 29.146    | 48.834 | 51.175 | 32.089 | 21.283 | 53.097    | 56.935 | 30.579 | 44.896 | 9.911  |           |  |  |  |
| 25.132 | 77.854      | 58.39  | 13.741 | 73.547  | 64.664  | 16.836    | 24.945   | 40.504 | 19.534 | 11.905 | 58.758    | 30.666 | 40.793 | 38.108 | 24.684 | 30.296    | 51.443 | 62.412 | 50.063 | 13.856 | 46.893    | 37.738 | 21.072 | 26.441 | 23.81  |           |  |  |  |
| 67.738 | 32.41       | 52.633 | 62.654 | 103.945 | 31.984  | 18.519    | 47.846   | 57.745 | 24.701 | 18.27  | 65.727    | 15.332 | 44.525 | 52.763 | 21.072 | 23.81     | 62.083 | 35.759 | 40.926 | 19.25  | 27.778    | 42.485 | 83.313 | 36.956 | 19.892 |           |  |  |  |
| 49.967 | 10.652      | 48.912 | 26.643 | 30.964  | 65.556  | 30.308    | 12.479   | 50.254 | 11.905 | 26.74  | 45.518    | 57.83  | 70.825 | 30.147 | 41.61  | 14.55     | 22.598 | 25.213 | 26.189 | 42.599 | 20.345    | 20.445 | 55.184 | 23.428 | 22.487 |           |  |  |  |
| 11.728 | 48.56       | 30.708 | 66.363 | 79.18   | 67.711  | 30.799    | 44.109   | 38.59  | 12.835 | 24.386 | 54.128    | 57.759 | 68.808 | 51.759 | 23.679 | 12.434    | 19.746 | 41.457 | 53.408 | 23.383 | 54.193    | 46.021 | 37.129 | 21.164 | 48.611 |           |  |  |  |
| 47.183 | 23.81       | 59.369 | 18.681 | 64.815  | 43.057  | 13.763    | 27.453   | 32.911 | 43.651 | 14.965 | 73.956    | 65.912 | 58.825 | 51.14  | 34.327 | 57.988    | 38.348 | 15.873 | 40.965 | 17.771 | 26.455    | 15.873 | 17.036 | 27.616 | 44.974 |           |  |  |  |
| 52.205 | 63.9        | 61.764 | 60.884 | 46.663  | 47.259  | 25.777    | 18.052   | 41.245 | 60.447 | 13.839 | 89.762    | 47.78  | 50.63  | 33.494 | 52.284 | 16.574    | 43.623 | 67.947 | 40.551 | 38.36  | 35.397    | 46.608 | 27.068 | 24.389 | 11.905 |           |  |  |  |
| 50.304 | 27.452      | 23.944 | 51.587 | 46.567  | 20.292  | 34.895    | 59.544   | 16.917 | 12.368 | 32.26  | 22.916    | 37.697 | 22.234 | 61.757 | 38.904 | 14.205    | 35.126 | 54.233 | 44.888 | 24.794 | 18.052    | 49.679 | 29.101 | 51.532 | 25.626 |           |  |  |  |
| 56.747 | 35.714      | 37.302 | 41.623 | 77.524  | 62.97   | 49.098    | 20.738   | 47.281 | 16.566 | 14.017 | 42.08     | 64.881 | 31.746 | 58.011 | 30.604 | 17.196    | 26.455 | 30.423 | 43.194 | 8.418  | 48.898    | 32.749 | 50.979 | 19.196 | 39.447 |           |  |  |  |
| 42.168 | 30.423      | 22.603 | 18.343 | 56.744  | 103.292 | 29.585    | 50.752   | 14.869 | 17.005 | 34.979 | 42.136    | 57.992 | 43.615 | 41.258 | 42.409 | 33.19     | 29.251 | 27.854 | 31.007 | 17.074 | 29.481    | 56.061 | 19.255 | 45.519 | 60.92  |           |  |  |  |
| 49.894 | 36.658      | 29.785 | 78.473 | 8.664   | 49.86   | 25.157    | 25.741   | 19.642 | 22.554 | 21.601 | 73.499    | 34.607 | 18.506 | 16.906 | 25.254 | 24.713    | 15.172 | 55.092 | 34.235 | 20.553 | 29.611    | 44.798 | 62.408 | 23.621 | 42.715 |           |  |  |  |
| 55.917 | 37.86       | 32.437 | 58.953 | 17.645  | 11.905  | 17.545    | 27.585   | 58.052 | 14.965 | 27.68  | 63.797    | 36.668 | 8.418  | 11.905 | 53.859 | 17.771    | 35.714 | 68.069 | 48.942 | 30.81  | 21.1      | 44.093 | 20.55  | 45.054 | 13.217 |           |  |  |  |
| 31.19  | 75.074      | 38.928 | 92.738 | 25.092  | 54.233  | 27.124    | 23.075   | 35.345 | 23.872 | 27.124 | 46.684    | 91.369 | 11.503 | 10.851 | 41.275 | 31.367    | 61.732 | 51.565 | 20.932 | 32.299 | 29.151    | 40.252 | 44.243 | 53.256 | 26.379 |           |  |  |  |
| 56.94  | 15.873      | 37.059 | 22.434 | 46.296  | 56.071  | 17.97     | 24.614   | 18.199 | 14.55  | 39.708 | 50.898    | 45.712 | 43.597 | 42.328 | 46.831 | 23.488    | 23.776 | 10.59  | 29.143 | 10.438 | 42.26     | 41.792 | 45.376 | 58.864 | 23.489 |           |  |  |  |
| 24.71  | 38.898      | 13.779 | 62.829 | 51.587  | 62.446  | 35.313    | 19.396   | 17.771 | 57.473 | 22.452 | 85.062    | 51.858 | 13.654 | 42.583 | 58.664 | 17.747    | 60.449 | 31.83  | 22.564 | 14.55  | 36.373    | 29.442 | 18.064 | 38.36  | 27.481 |           |  |  |  |
| 47.702 | 21.739      | 69.105 | 89.998 | 11.775  | 22.487  | 60.892    | 26.455   | 44.538 | 26.868 | 41.422 | 63.001    | 46.927 | 28.635 | 38.1   | 48.653 | 21.164    | 34.029 | 14.302 | 19.533 | 40.749 | 48.177    | 18.288 | 46.42  | 23.374 | 64.478 |           |  |  |  |
| 26.065 | 19.966      | 57.607 | 41.005 | 78.695  | 68.66   | 15.873    | 32.559   | 21.298 | 28.199 | 58.302 | 93.102    | 58.385 | 31.425 | 36.486 | 31.746 | 41.005    | 26.455 | 23.988 | 23.762 | 30.775 | 33.306    | 54.082 | 43.006 | 34.646 | 33.184 |           |  |  |  |
| 12.428 | 42.767      | 36.384 | 42.904 | 21.895  | 57.055  | 22.432    | 27.97    | 53.649 | 11.878 | 39.781 | 71.492    | 63.504 | 21.164 | 36.895 | 41.005 | 19.998    | 50.316 | 53.969 | 38.871 | 41.29  | 24.097    | 41.011 | 52.922 | 12.489 | 26.455 |           |  |  |  |
| 62.535 | 16.576      | 14.03  | 71.914 | 43.22   | 49.115  | 19.841    | 15.873   | 37.857 | 40.213 | 37.525 | 57.452    | 39.645 | 40.662 | 22.487 | 48.521 | 19.874    | 10.482 | 79.791 | 39.398 | 58.971 | 47.405    | 53.226 | 36.279 | 46.332 | 56.673 |           |  |  |  |
| 48.221 | 30.901      | 15.901 | 47.619 | 24.425  | 51.655  | 19.381    | 38.806   | 33.231 | 41.825 | 26.937 | 61.927    | 11.224 | 13.761 | 16.672 | 17.474 | 32.281    | 34.882 | 54.151 | 26.998 | 31.34  | 38.824    | 35.199 | 17.196 | 18.357 | 39.225 |           |  |  |  |
| 66.257 | 60.467      | 42.748 | 52.31  | 21.653  | 40.5    | 24.878    | 42.013   | 35.879 | 28.247 | 17.196 | 41.434    | 44.974 | 13.382 | 17.221 | 31.223 | 31.775    | 43.755 | 12.49  | 30.865 | 23.082 | 35.578    | 40.92  | 58.339 | 70.574 | 37.856 |           |  |  |  |
| 23.81  | 31.45       | 70.779 | 29.84  | 73.268  | 48.324  | 32.119    | 42.955   | 35.823 | 31.577 | 13.809 | 40.929    | 28.598 | 28.394 | 40.32  | 35.803 | 26.534    | 9.259  | 17.163 | 56.184 | 10.224 | 25.824    | 24.342 | 49.345 | 66.948 | 34.392 |           |  |  |  |
| 70.165 | 57.735      | 59.419 | 62.662 | 58.572  | 47.961  | 17.132    | 36.46    | 62.353 | 15.566 | 26     | 80.913    | 63.824 | 34.217 | 47.235 | 24.93  | 38.348    | 14.55  | 9.259  | 41.834 | 29.93  | 21.839    | 46.766 | 46.193 | 34.392 | 39.609 |           |  |  |  |
| 32.796 | 28.749      | 61.906 | 52.291 | 24.878  | 7.18    | 44.871    | 11.528   | 56.31  | 23.533 | 23.7   | 39.819    | 55.558 | 21.311 | 22.487 | 44.684 | 29.101    | 56.214 | 66.99  | 41.03  | 31.803 | 17.085    | 84.299 | 51.548 | 37.037 | 27.778 |           |  |  |  |
| 42.683 | 26.535      | 42.166 | 91.313 | 68.125  | 40.755  | 35.904    | 9.259    | 38.891 | 28.863 | 55.447 | 47.928    | 59.362 | 23.862 | 29.005 | 30.414 | 12.325    | 13.612 | 69.238 | 50.882 | 49.705 | 48.81     | 14.742 | 62.667 | 30.775 | 49.785 |           |  |  |  |
| 22.234 | 45.132      | 41.069 | 66.323 | 42.648  | 33.136  | 36.287    | 28.242   | 21.095 | 30.689 | 26.483 | 51.683    | 43.025 | 72.797 | 26.355 | 36.66  | 16.744    | 21.513 | 28.561 | 22.522 | 25.132 | 49.917    | 53.553 | 51.614 | 45.246 | 56.274 |           |  |  |  |
| 57.537 | 30.736      | 11.224 | 27.76  | 56.706  | 65.653  | 46.296    | 55.928   | 40.452 | 35.042 | 10.582 | 77.143    | 26.395 | 48.767 | 11.251 | 14.55  | 18.519    | 45.176 | 39.284 | 47.848 | 41.753 | 34.607    | 46.252 | 25.132 | 36.666 | 47.959 |           |  |  |  |
| 46.255 | 58.926      | 46.866 | 64.591 | 73.613  | 24.817  | 62.77     | 37.102   | 59.207 | 13.228 | 40.69  | 93.554    | 57.187 | 25.198 | 38.725 | 15.35  | 16.826    | 37.557 | 29.874 | 23.383 | 26.455 | 38.536    | 54.312 | 44.912 | 28.778 | 34.65  |           |  |  |  |
| 39.069 | 46.561      | 40.256 | 72.131 | 69.352  | 16.66   | 13.095    | 48.362   | 40.78  | 30.999 | 50.882 | 66.332    | 58.985 | 33.528 | 39.349 | 32.736 | 15.011    | 62.976 | 33.938 | 24.913 | 17.196 | 41.217    | 86.602 | 26.455 | 25.17  | 14.209 |           |  |  |  |
| 21.164 | 23.052      | 50.162 | 38.697 | 46.365  | 29.101  | 21.164    | 33.25    | 19.427 | 27.376 | 26.166 | 45.86     | 47.918 | 14.559 | 68.438 | 41.154 | 39.173    | 21.754 | 15.722 | 11.224 | 59.721 | 54.864    | 51.438 | 68.805 | 53.692 | 29.12  |           |  |  |  |
| 42.346 | 19.917      | 53.107 | 61.57  | 91.901  | 66.998  | 41.361    | 51.799   | 17.684 | 35.993 | 19.082 | 49.604    | 73.473 | 34.178 | 52.73  | 34.755 | 23.8      | 25.584 | 32.874 | 19.642 | 12.899 | 21.53     | 50.265 | 62.408 | 58.201 | 67.586 |           |  |  |  |
| 48.028 | 40.592      | 54.311 | 63.215 | 27.096  | 56.458  | 21.379    | 10.33    | 13.329 | 10.02  | 17.771 | 67.644    | 31.055 | 40.098 | 34.392 | 22.828 | 17.196    | 25.107 | 70.542 | 36.478 | 50.265 | 48.255    | 59.555 | 80.417 | 34.369 | 17.196 |           |  |  |  |
| 29.091 | 43.651      | 39.782 | 45.56  | 13.362  | 12.665  | 29.285    | 26.455</ |        |        |        |           |        |        |        |        |           |        |        |        |        |           |        |        |        |        |           |  |  |  |

|        |        |        |        |        |        |        |        |        |        |        |        |         |        |        |        |        |        |        |        |        |        |        |        |        |        |
|--------|--------|--------|--------|--------|--------|--------|--------|--------|--------|--------|--------|---------|--------|--------|--------|--------|--------|--------|--------|--------|--------|--------|--------|--------|--------|
| 45.657 | 32.777 | 68.147 | 49.249 | 57.285 | 73.42  | 21.164 | 18.934 | 29.93  | 31.763 | 17.858 | 63.572 | 59.825  | 31.255 | 19.885 | 26.455 | 16.644 | 29.71  | 31.357 | 42.344 | 56.12  | 18.741 | 67.349 | 27.528 | 22.487 | 47.415 |
| 38.738 | 61.071 | 32.548 | 77.815 | 21.458 | 61.63  | 33.048 | 34.392 | 31.022 | 17.196 | 26.963 | 83.449 | 62.277  | 15.564 | 26.191 | 48.14  | 34.068 | 44.308 | 26.321 | 36.478 | 18.799 | 49.509 | 27.654 | 70.021 | 43.954 | 11.905 |
| 13.228 | 37.637 | 32.251 | 46.296 | 87.946 | 7.899  | 22.786 | 19.532 | 27.925 | 58.127 | 41.711 | 52.063 | 70.413  | 27.075 | 26.441 | 35.407 | 45.653 | 47.619 | 30.32  | 39.399 | 21.458 | 26.455 | 84.039 | 51.015 | 49.526 | 41.394 |
| 18.94  | 61.999 | 52.378 | 51.508 | 68.994 | 67.075 | 31.583 | 34.857 | 63.793 | 41.674 | 28.995 | 68.041 | 30.158  | 43.088 | 18.307 | 36.675 | 39.284 | 18.381 | 39.527 | 41.476 | 37.037 | 34.22  | 45.891 | 36.257 | 43.651 | 29.163 |
| 20.577 | 57.643 | 18.2   | 56.693 | 21.032 | 76.4   | 22.448 | 10.582 | 48.73  | 17.137 | 12.092 | 54.391 | 84.656  | 50.508 | 25.132 | 24.793 | 28.925 | 20.196 | 74.922 | 12.307 | 14.642 | 54.31  | 43.796 | 56.257 | 46.619 | 31.686 |
| 26.972 | 48.929 | 31.067 | 74.851 | 30.618 | 56.015 | 15.873 | 18.519 | 22.638 | 19.269 | 7.946  | 48.535 | 31.931  | 24.724 | 32.122 | 63.976 | 9.259  | 73.613 | 36.861 | 9.948  | 17.196 | 32.086 | 49.729 | 48.448 | 10.884 | 44.963 |
| 19.642 | 28.556 | 17.479 | 61.732 | 48.942 | 20.68  | 32.446 | 31.277 | 50.63  | 33.718 | 26.455 | 42.225 | 12.549  | 19.513 | 18.32  | 61.831 | 53.581 | 50.552 | 21.336 | 11.905 | 29.805 | 43.559 | 18.519 | 50.295 | 61.918 | 20.117 |
| 12.195 | 32.822 | 43.453 | 29.454 | 72.2   | 42.114 | 35.306 | 32.281 | 15.47  | 30.923 | 44.842 | 59.428 | 46.141  | 17.617 | 18.519 | 13.018 | 17.574 | 23.132 | 20.461 | 29.29  | 39.24  | 49.85  | 57.403 | 28.865 | 39.683 | 32.285 |
| 21.557 | 24.977 | 46.931 | 22.487 | 57.596 | 58.088 | 23.083 | 61.156 | 23.085 | 23.562 | 15.873 | 56.044 | 60.102  | 21.898 | 25.346 | 43.574 | 15.453 | 55.321 | 18.681 | 23.341 | 15.873 | 21.997 | 41.154 | 16.772 | 62.89  | 34.823 |
| 31.409 | 33.672 | 53.796 | 66.875 | 23.81  | 48.544 | 14.681 | 53.314 | 45.63  | 20.714 | 11.905 | 70.106 | 62.169  | 22.847 | 22.402 | 19.847 | 22.446 | 14.03  | 26.904 | 62.956 | 44.785 | 8.372  | 62.904 | 83.184 | 13.228 | 15.117 |
| 13.228 | 12.785 | 33.372 | 76.378 | 29.101 | 64.815 | 47.144 | 15.493 | 64.748 | 30.423 | 47.878 | 71.973 | 93.581  | 73.153 | 31.415 | 10.005 | 19.841 | 40.884 | 32.67  | 46.419 | 30.775 | 44.893 | 58.151 | 31.388 | 46.516 | 25.804 |
| 45.948 | 19.989 | 11.905 | 14.55  | 65.728 | 51.474 | 21.025 | 15.921 | 19.642 | 45.564 | 26.184 | 44.274 | 44.273  | 31.064 | 44.485 | 36.922 | 34.973 | 15.873 | 14.55  | 43.106 | 11.838 | 36.821 | 58.595 | 58.152 | 22.497 | 13.891 |
| 21.164 | 34.071 | 54.099 | 50.219 | 40.752 | 79.75  | 17.753 | 15.901 | 61.297 | 15.538 | 29.479 | 67.96  | 43.396  | 81.003 | 9.625  | 45.466 | 19.642 | 19.049 | 65.994 | 21.305 | 53.273 | 34.251 | 64.59  | 27.778 | 38.03  | 22.412 |
| 51.541 | 54.003 | 41.005 | 51.934 | 21.104 | 71.899 | 33.726 | 23.672 | 18.781 | 47.619 | 47.434 | 61.428 | 29.669  | 14.477 | 45.608 | 32.296 | 16.947 | 19.841 | 44.974 | 43.651 | 19.527 | 25.757 | 39.091 | 20.292 | 23.531 | 55.454 |
| 35.629 | 55.812 | 56.152 | 58.146 | 56.076 | 32.427 | 17.163 | 46.566 | 60.749 | 14.55  | 19.881 | 65.094 | 41.877  | 38.9   | 11.251 | 35.198 | 39.683 | 20.504 | 46.978 | 21.164 | 12.586 | 32.961 | 86.612 | 66.36  | 31.355 | 31.322 |
| 17.576 | 14.323 | 77.985 | 80.709 | 60.312 | 62.446 | 34.926 | 14.965 | 60.96  | 21.164 | 23.676 | 40.647 | 61.564  | 49.388 | 67.063 | 29.946 | 19.642 | 37.655 | 26.36  | 26.399 | 24.215 | 19.527 | 74.27  | 33.436 | 49.384 | 34.766 |
| 28.397 | 51.587 | 48.824 | 54.871 | 52.113 | 62.068 | 23.596 | 19.957 | 32.893 | 19.841 | 22.809 | 80.917 | 63.797  | 65.647 | 44.333 | 41.25  | 25.162 | 52.211 | 89.387 | 34.329 | 26.775 | 50.048 | 49.854 | 72.955 | 29.013 | 24.256 |
| 28.384 | 52.209 | 83.13  | 24.835 | 23.346 | 35.513 | 17.964 | 28.708 | 32.6   | 24.843 | 21.283 | 69.79  | 103.792 | 29.966 | 14.647 | 25.372 | 16.34  | 68.847 | 38.36  | 58.021 | 41.005 | 32.983 | 10.601 | 9.415  | 18.619 | 25.083 |
| 47.619 | 26.357 | 52.245 | 63.692 | 93.81  | 36.582 | 58.706 | 47.848 | 26.455 | 39.718 | 13.095 | 60.865 | 63.055  | 15.873 | 27.778 | 30.488 | 33.028 | 34.392 | 7.937  | 27.156 | 9.064  | 25.613 | 25.75  | 41.537 | 71.538 | 39.9   |
| 17.005 | 50.265 | 48.365 | 33.65  | 26.455 | 36.352 | 31.594 | 32.731 | 40.796 | 13.248 | 33.873 | 65.567 | 38.461  | 47.165 | 38.247 | 27.946 | 48.258 | 11.224 | 10.582 | 37.217 | 35.986 | 71.623 | 99.825 | 68.783 | 22.749 | 16.687 |
| 11.224 | 41.32  | 47.619 | 47.098 | 35.434 | 15.382 | 52.539 | 29.26  | 16.959 | 41.005 | 11.744 | 64.383 | 20.553  | 14.163 | 56.788 | 21.55  | 32.501 | 13.228 | 58.339 | 36.051 | 29.963 | 42.328 | 78.988 | 28.306 | 60.847 | 21.549 |
| 48.637 | 54.121 | 52.63  | 52.618 | 15.873 | 34.317 | 39.303 | 22.811 | 47.623 | 20.072 | 18.006 | 50.392 | 21.123  | 38.36  | 41.005 | 16.41  | 43.127 | 39.525 | 23.81  | 23.707 | 15.901 | 39.294 | 56.567 | 17.771 | 38.227 | 18.832 |
| 13.467 | 23.008 | 63.247 | 57.766 | 73.868 | 38.36  | 63.51  | 10.224 | 36.474 | 21.98  | 40.312 | 75.41  | 85.979  | 20.599 | 17.163 | 44.772 | 18.932 | 11.849 | 22.448 | 39.068 | 32.839 | 45.625 | 15.152 | 17.332 | 45.27  | 38.023 |
| 13.228 | 41.322 | 20.553 | 16.836 | 58.575 | 39.514 | 27.705 | 35.817 | 21.289 | 21.453 | 72.013 | 59.428 | 11.528  | 54.604 | 13.895 | 17.571 | 36.642 | 19.938 | 26.054 | 61.937 | 42.249 | 43.526 | 30.938 | 23.299 | 23.825 | 9.259  |
| 13.228 | 29.93  | 57.109 | 63.539 | 21.164 | 72.56  | 39.673 | 12.815 | 26.778 | 30.707 | 40.219 | 25.103 | 42.716  | 28.19  | 49.713 | 65.31  | 31.237 | 67.351 | 11.161 | 52.173 | 36.478 | 42.576 | 13.228 | 46.332 | 24.266 | 38.592 |
| 16.321 | 29.555 | 14.526 | 55.115 | 54.669 | 55.713 | 38.427 | 21.895 | 20.772 | 24.682 | 20.051 | 37.451 | 58.884  | 39.683 | 26.033 | 27.57  | 12.027 | 19.77  | 10.289 | 42.443 | 10.513 | 63.387 | 14.55  | 53.033 | 35.142 | 30.145 |
| 54.04  | 81.203 | 19.226 | 49.266 | 60.547 | 30.173 | 15.873 | 43.106 | 10.388 | 19.672 | 35.474 | 59.406 | 57.472  | 67.735 | 44.045 | 16.613 | 37.408 | 22.044 | 46.644 | 47.924 | 12.706 | 28.594 | 51.584 | 55.254 | 25.132 | 40.049 |
| 16.788 | 27.62  | 94.891 | 60.774 | 41.103 | 27.691 | 30.423 | 29.013 | 66.915 | 28.233 | 15.278 | 54.234 | 38.573  | 17.778 | 10.582 | 12.838 | 17.715 | 45.276 | 10.336 | 38.818 | 33.141 | 35.708 | 57.823 | 50.889 | 66.121 | 15.976 |
| 32.927 | 23.949 | 69.852 | 59.192 | 34.589 | 66.397 | 25.132 | 29.101 | 44.201 | 26.698 | 17.196 | 52.104 | 37.067  | 31.309 | 26.606 | 30.423 | 19.642 | 52.378 | 14.281 | 25.132 | 26.21  | 52.363 | 42.829 | 43.309 | 49.122 | 42.591 |
| 21.513 | 35.752 | 41.619 | 30.358 | 16.838 | 61.933 | 44.269 | 18.196 | 33.124 | 49.981 | 18.838 | 64.777 | 71.949  | 30.778 | 31.949 | 32.311 | 42.341 | 27.541 | 27.184 | 29.336 | 33.14  | 42.636 | 14.896 | 37.577 | 17.75  | 23.742 |
| 24.965 | 11.905 | 39.965 | 71.117 | 18.767 | 46.091 | 24.849 | 41.398 | 34.65  | 20.855 | 24.256 | 89.842 | 41.453  | 22.13  | 32.658 | 42.22  | 11.39  | 47.464 | 21.914 | 18.72  | 44.088 | 23.665 | 78.567 | 52.638 | 20.983 | 15.237 |
| 8.333  | 18.519 | 44.805 | 41.161 | 65.547 | 32.736 | 43.628 | 21.513 | 28.496 | 20.553 | 20.22  | 49.909 | 36.839  | 46.296 | 32.539 | 16.085 | 16.836 | 25.132 | 48.909 | 27.691 | 31.311 | 39.683 | 69.689 | 10.582 | 10.904 | 10.582 |
| 27.528 | 35.666 | 33.442 | 37.665 | 21.506 | 37.511 | 29.739 | 41.005 | 42.09  | 67.826 | 9.304  | 21.89  | 27.124  | 48.442 | 26.419 | 36.982 | 28.842 | 31.443 | 17.614 | 24.683 | 45.831 | 35.405 | 51.416 | 14.03  | 26.799 | 39.821 |
| 33.217 | 44.896 | 41.005 | 52.438 | 55.663 | 25.877 | 40.232 | 13.228 | 17.196 | 15.873 | 18.264 | 42.027 | 35.136  | 28.995 | 40.775 | 27.057 | 11.905 | 21.936 | 7.937  | 27.139 | 39.888 | 11.224 | 56.465 | 46.71  | 31.298 | 34.914 |
| 53.093 | 14.55  | 19.527 | 58.073 | 29.642 | 41.851 | 21.095 | 19.056 | 74.015 | 26.189 | 19.994 | 63.666 | 76.366  | 34.581 | 23.422 | 39.686 | 17.156 | 21.164 | 14.55  | 46.566 | 19.531 | 54.074 | 46.737 | 68.43  | 29.111 | 23.336 |
| 30.765 | 30.542 | 17.715 | 49.429 | 19.642 | 66.408 | 15.903 | 21.164 | 48.942 | 35.714 | 37.314 | 66.139 | 60.237  | 52.91  | 48.234 | 41.682 | 15.606 | 26.455 | 55.981 | 34.392 | 40.079 | 41.607 | 27.787 | 41.022 | 17.771 | 11.57  |
| 14.55  | 73.993 | 49.545 | 58.945 | 17.292 | 24.999 | 33.669 | 33.541 | 55.64  | 12.114 | 31.067 | 74.475 | 70.149  | 36.894 | 48.942 | 36.545 | 38.991 | 35.881 | 41.398 | 39.456 | 9.74   | 16.387 | 38.162 | 37.037 | 26.455 | 31.638 |
| 19.841 | 34.908 | 64.82  | 60.955 | 56.309 | 58.165 | 29.101 | 25.934 | 49.988 | 32.364 | 21.14  | 73.559 | 35.714  | 30.271 | 66.523 | 48.873 | 9.259  | 11.747 | 39.683 | 43.065 | 14.55  | 40.017 | 35.562 | 31.431 | 46.911 | 15.047 |
| 13.228 | 22.916 | 56.159 | 62.699 | 54.839 | 60.486 | 13.099 | 47.619 | 35.017 | 16.585 | 23.972 | 86.615 | 20.219  | 40.494 | 44.816 | 34.65  | 13.007 | 64.815 | 18.005 | 34.131 | 33.883 | 19.841 | 49.44  | 18.664 | 10.04  | 21.825 |
| 17.196 | 31.746 | 37.965 | 49.786 | 42.197 | 52.91  | 17.575 | 15.392 | 49.932 | 36.093 | 29.101 | 67.694 | 51.946  | 41.839 | 25.829 | 34.994 | 23.321 | 22.228 | 56.12  | 30.171 | 19.858 | 13.677 | 65.261 | 59.255 | 37.066 | 35.314 |
| 24.135 | 50.718 | 53.104 | 56.84  | 39.683 | 56.927 | 50.097 | 27.217 | 27.692 | 19.474 | 26.24  | 67.783 | 20.997  | 12.134 | 26.357 | 56.036 | 43.96  | 17.196 | 19.45  | 33.86  | 24.192 | 33.863 | 83.707 | 24.129 | 15.08  | 24.588 |
| 12.148 | 50.875 | 66.721 | 18.553 | 18.925 | 69.787 | 16.859 | 52.1   | 35.714 | 15.336 | 39.334 | 12.216 | 45.482  | 42.773 | 44.151 | 58.434 | 18.535 | 45.237 | 18.627 | 14.965 | 50.265 | 49.088 | 42.556 | 13.925 | 24.263 | 13.228 |
| 47.918 | 34.914 | 37.867 | 84.271 | 62.505 | 28.338 | 52.88  | 31.349 | 37.723 | 9.259  | 69.755 | 54.968 | 36.738  | 36.493 | 22.487 | 34.452 | 45.616 | 58.073 | 44.002 | 49.715 | 44.357 | 25.132 | 42.805 |        |        |        |

|        |        |        |        |        |        |        |        |        |        |        |        |        |        |        |        |        |        |        |        |        |        |         |        |        |        |        |
|--------|--------|--------|--------|--------|--------|--------|--------|--------|--------|--------|--------|--------|--------|--------|--------|--------|--------|--------|--------|--------|--------|---------|--------|--------|--------|--------|
| 18.14  | 59.923 | 61.978 | 23.81  | 53.578 | 11.905 | 68.541 | 23.81  | 43.465 | 62.053 | 39.717 | 72.846 | 20.405 | 32.406 | 20.442 | 32.441 | 25.741 | 41.362 | 38.65  | 20.521 | 37.037 | 26.455 | 55.505  | 40.829 | 58.033 | 46.112 |        |
| 11.589 | 36.35  | 60.41  | 54.677 | 30.97  | 46.561 | 43.651 | 16.9   | 17.196 | 33.931 | 13.095 | 54.233 | 73.794 | 29.576 | 19.524 | 27.442 | 44.781 | 22.913 | 43.651 | 46.783 | 48.38  | 25.919 | 63.843  | 72.237 | 54.073 | 44.946 |        |
| 10.006 | 17.729 | 63.53  | 24.704 | 19.841 | 39.639 | 37.509 | 30.423 | 24.707 | 28.165 | 9.259  | 23.079 | 55.556 | 29.7   | 22.487 | 14.162 | 41.422 | 26.169 | 35.542 | 31.99  | 14.225 | 29.744 | 45.118  | 19.122 | 35.335 | 44.199 |        |
| 26.455 | 61.012 | 61.877 | 14.03  | 58.978 | 39.772 | 38.761 | 22.487 | 24.318 | 15.482 | 29.084 | 22.448 | 24.435 | 52.405 | 20.994 | 41.031 | 59.404 | 51.379 | 25.796 | 10.582 | 50.881 | 13.228 | 21.62   | 57.823 | 23.134 | 77.532 | 16.612 |
| 17.968 | 17.196 | 60.348 | 44.555 | 30.147 | 25.254 | 15.467 | 16.836 | 58.746 | 35.131 | 18.707 | 69.486 | 29.613 | 36.535 | 26.455 | 19.491 | 11.775 | 22.058 | 21.11  | 27.772 | 34.392 | 24.898 | 62.862  | 37.39  | 12.984 | 30.73  |        |
| 17.196 | 50.368 | 21.298 | 59.4   | 50.937 | 44.123 | 51.831 | 30.275 | 59.668 | 23.81  | 33.605 | 62.928 | 56.749 | 38.355 | 39.284 | 15.952 | 27.323 | 23.286 | 38.097 | 33.001 | 12.515 | 62.341 | 23.744  | 35.578 | 40.227 | 30.866 |        |
| 39.361 | 29.689 | 12.14  | 45.817 | 45.293 | 70.336 | 23.81  | 27.554 | 33.585 | 52.629 | 11.688 | 40.756 | 19.841 | 24.092 | 39.218 | 50     | 20.539 | 46.766 | 27.404 | 48.724 | 22.099 | 23.601 | 47.724  | 18.707 | 7.542  | 23.81  |        |
| 20.811 | 27.778 | 46.175 | 60.049 | 60.646 | 51.125 | 32.002 | 33.333 | 41.005 | 38.931 | 27.807 | 55.244 | 30.288 | 39.623 | 30.339 | 56.179 | 22.381 | 62.169 | 33.798 | 26.455 | 44.454 | 31.079 | 28.661  | 25.695 | 26.425 | 34.804 |        |
| 13.228 | 15.873 | 55.217 | 14.994 | 45.252 | 33.672 | 47.392 | 11.905 | 43.803 | 41.627 | 26.706 | 76.4   | 84.928 | 29.581 | 57.926 | 21.792 | 18.519 | 37.241 | 53.164 | 36.83  | 15.873 | 33.807 | 76.224  | 43.651 | 19.412 | 21.9   |        |
| 70.43  | 65.531 | 48.463 | 48.784 | 64.032 | 51.103 | 15.655 | 32.736 | 59.173 | 38.793 | 13.051 | 69.11  | 52.506 | 59.175 | 14.024 | 10.582 | 10.564 | 18.519 | 57.627 | 28.593 | 11.587 | 22.487 | 82.647  | 60.424 | 29.588 | 46.771 |        |
| 23.81  | 48.941 | 37.413 | 10.582 | 43.651 | 34.345 | 63.268 | 22.386 | 35.792 | 15.262 | 11.905 | 74.185 | 27.13  | 25.132 | 43.912 | 27.778 | 30.88  | 27.807 | 22.312 | 13.839 | 14.965 | 27.778 | 54.005  | 14.796 | 12.271 | 19.527 |        |
| 17.402 | 34.852 | 50.665 | 63.492 | 22.498 | 41.125 | 19.177 | 31.327 | 17.151 | 22.43  | 48.765 | 36.74  | 30.383 | 18.417 | 55.471 | 18.519 | 31.374 | 11.905 | 41.877 | 21.688 | 48.587 | 33.942 | 56.12   | 38.689 | 58.201 | 23.383 |        |
| 25.466 | 21.305 | 56.996 | 61.142 | 30.129 | 38.298 | 25.648 | 22.443 | 80.688 | 20.718 | 14.232 | 48.269 | 51.049 | 23.241 | 53.265 | 18.707 | 19.052 | 22.058 | 22.487 | 36.478 | 11.558 | 41.005 | 16.298  | 33.337 | 33.237 | 14.03  |        |
| 17.196 | 10.46  | 54.324 | 63.576 | 58.201 | 56.651 | 15.08  | 11.905 | 21.298 | 30.797 | 27.423 | 52.709 | 68.986 | 27.571 | 43.089 | 50.151 | 17.507 | 26.621 | 36.861 | 15.331 | 21.477 | 27.916 | 69.701  | 19.828 | 46.851 | 35.982 |        |
| 43.516 | 58.85  | 68.261 | 74.333 | 65.31  | 13.608 | 61.1   | 30.866 | 20.892 | 19.841 | 62.169 | 98.21  | 44.871 | 25.132 | 23.888 | 13.982 | 17.33  | 19.623 | 49.664 | 58.894 | 48.942 | 41.555 | 20.051  | 29.503 | 55.556 | 14.55  |        |
| 51.599 | 33.069 | 55.184 | 14.039 | 60.07  | 45.795 | 21.164 | 47.273 | 53.03  | 29.151 | 22.764 | 17.571 | 62.88  | 31.54  | 17.991 | 23.383 | 76.471 | 37.037 | 31.746 | 10.045 | 45.196 | 25.926 | 67.344  | 66.606 | 43.025 | 34.531 |        |
| 39.895 | 25.588 | 16.903 | 49.655 | 24.33  | 29.372 | 42.292 | 41.55  | 61.234 | 24.841 | 12.336 | 88.322 | 69.007 | 21.825 | 19.924 | 24.137 | 30.089 | 39.683 | 21.067 | 28.06  | 14.559 | 39.307 | 20.711  | 28.725 | 42.091 | 19.524 |        |
| 11.905 | 9.259  | 68.424 | 11.064 | 79.272 | 19.572 | 33.672 | 27.126 | 47.619 | 18.155 | 40.26  | 78.042 | 59.441 | 19.816 | 22.487 | 21.164 | 15.985 | 44.357 | 43.803 | 42.09  | 48.942 | 19.729 | 58.404  | 34.676 | 43.063 | 19.199 |        |
| 24.077 | 61.536 | 65.313 | 47.256 | 65.433 | 17.363 | 42.354 | 14.506 | 29.71  | 43.025 | 21.677 | 17.771 | 28.292 | 42.765 | 13.228 | 35.502 | 17.008 | 40.095 | 26.036 | 26.642 | 30.015 | 51.203 | 41.302  | 31.033 | 34.154 | 26.21  |        |
| 15.873 | 69.572 | 85.924 | 54.233 | 71.233 | 33.471 | 55.269 | 80.408 | 30.16  | 45.828 | 34.973 | 66.007 | 51.283 | 39.841 | 60.356 | 22.167 | 33.333 | 20.483 | 69.704 | 32.044 | 51.796 | 30.851 | 72.933  | 77.3   | 15.047 | 56.878 |        |
| 18.519 | 23.744 | 20.092 | 51.587 | 59.546 | 10.342 | 9.259  | 22.402 | 38.6   | 27.593 | 14.543 | 62.278 | 12.399 | 36.486 | 13.718 | 58.146 | 41.995 | 27.778 | 52.218 | 53.314 | 58.187 | 36.947 | 42.328  | 37.926 | 33.338 | 39.468 |        |
| 16.048 | 42.271 | 34.039 | 54.894 | 66.138 | 20.336 | 34.48  | 17.196 | 52.795 | 22.839 | 17.196 | 58.91  | 73.573 | 26.56  | 25.937 | 31.193 | 23.573 | 45.248 | 31.801 | 45.665 | 29.533 | 31.678 | 72.02   | 21.513 | 52.666 | 57.888 |        |
| 35.966 | 55.018 | 54.378 | 63.904 | 58.946 | 16.151 | 21.164 | 29.331 | 37.037 | 25.804 | 12.765 | 65.473 | 9.618  | 27.834 | 31.153 | 47.368 | 13.951 | 35.494 | 44.9   | 48.518 | 11.688 | 24.286 | 52.753  | 67.46  | 60.847 | 32.367 |        |
| 46.459 | 66.676 | 58.201 | 54.159 | 69.628 | 41.707 | 21.164 | 25.804 | 28.878 | 34.913 | 36.771 | 43.11  | 23.433 | 51.769 | 23.81  | 26.956 | 15.064 | 24.295 | 22.759 | 38.895 | 31.68  | 20.934 | 27.371  | 30.908 | 53.326 | 27.411 |        |
| 9.799  | 24.575 | 51.338 | 64.279 | 59.148 | 23.286 | 51.587 | 51.496 | 50.508 | 13.839 | 23.394 | 54.338 | 66.743 | 26.019 | 29.879 | 28.45  | 28.781 | 39.683 | 42.09  | 16.959 | 18.309 | 25.797 | 52.306  | 55.229 | 43.254 | 47.428 |        |
| 14.55  | 26.914 | 74.642 | 15.054 | 37.489 | 49.367 | 50.044 | 17.014 | 18.519 | 18.519 | 25.017 | 56.673 | 51.443 | 29.887 | 11.558 | 63.911 | 13.158 | 17.567 | 50.051 | 39.13  | 16.317 | 26.098 | 65.486  | 11.299 | 36.023 | 56.973 |        |
| 15.504 | 25.124 | 40.972 | 49.024 | 65.046 | 30.439 | 25.341 | 18.636 | 16.921 | 30.48  | 18.83  | 52.718 | 35.714 | 57.4   | 16.836 | 15.873 | 17.402 | 27.778 | 43.006 | 19.326 | 18.612 | 16.393 | 35.688  | 15.873 | 52.228 | 42.056 |        |
| 20.147 | 30.89  | 36.968 | 53.569 | 48.52  | 35.193 | 19.255 | 22.487 | 31.467 | 21.466 | 36.614 | 78.727 | 35.714 | 30.344 | 25.132 | 22.487 | 42.881 | 14.55  | 37.385 | 56.677 | 17.771 | 24.856 | 46.506  | 19.642 | 26.455 | 36.634 |        |
| 62.065 | 43.658 | 28.231 | 23.81  | 59.67  | 48.126 | 30.841 | 50.608 | 59.586 | 19.255 | 47.619 | 22.763 | 39.022 | 11.905 | 39.899 | 47.313 | 14.125 | 22.487 | 13.095 | 20.403 | 35.563 | 32.195 | 37.841  | 27.778 | 57.171 | 65.62  |        |
| 14.292 | 13.095 | 49.166 | 81.044 | 16.584 | 11.069 | 44.327 | 51.36  | 20.969 | 27.721 | 37.366 | 61.069 | 65.063 | 39.043 | 10.582 | 29.645 | 28.722 | 21.865 | 54.249 | 49.935 | 42.86  | 12.558 | 55.429  | 23.062 | 47.619 | 43.499 |        |
| 10.06  | 20.711 | 52.643 | 55.102 | 21.76  | 32.179 | 19.091 | 14.55  | 54.102 | 29.93  | 10.641 | 57.775 | 41.228 | 52.073 | 38.768 | 27.007 | 34.392 | 41.049 | 13.228 | 28.355 | 38.148 | 21.334 | 66.605  | 47.55  | 73.218 | 17.543 |        |
| 57.81  | 72.357 | 45.878 | 58.404 | 66.863 | 66.297 | 46.754 | 20.302 | 24.289 | 9.3    | 50.214 | 84.533 | 48.287 | 26.221 | 18.133 | 14.816 | 36.753 | 8.745  | 56.79  | 57.217 | 38.846 | 17.13  | 57.614  | 60.092 | 45.882 | 43.651 |        |
| 16.421 | 23.669 | 42.1   | 55.759 | 82.841 | 18.237 | 29.066 | 26.189 | 40.482 | 18.94  | 17.196 | 70.149 | 9.259  | 87.641 | 38.1   | 31.801 | 17.99  | 22.459 | 17.48  | 37.037 | 27.778 | 42.328 | 103.821 | 41.082 | 74.664 | 35.714 |        |
| 11.905 | 27.058 | 36.935 | 28.397 | 42.528 | 18.355 | 55.184 | 23.81  | 16.321 | 36.478 | 51.587 | 77.49  | 29.836 | 43.622 | 45.333 | 20.879 | 28.364 | 13.187 | 53.272 | 29.101 | 12.968 | 43.191 | 41.888  | 45.903 | 25.132 | 34.973 |        |
| 16.919 | 43.776 | 42.966 | 75.44  | 80.227 | 42.088 | 25.668 | 29.143 | 40.923 | 19.096 | 26.455 | 67.614 | 43.626 | 60.798 | 51.25  | 50.214 | 20.386 | 75.818 | 29.101 | 28.854 | 44.69  | 34.392 | 49.379  | 22.487 | 20.08  | 57.876 |        |
| 29.93  | 57.429 | 9.799  | 52.753 | 46.931 | 28.48  | 12.721 | 21.101 | 62.733 | 13.228 | 26.83  | 61.34  | 68.521 | 24.219 | 43.517 | 63.9   | 15.873 | 27.895 | 18.169 | 34.106 | 24.318 | 40.861 | 15.902  | 66.013 | 38.098 | 47.063 |        |
| 27.901 | 54.53  | 23.574 | 14.307 | 50.265 | 15.645 | 32.517 | 20.446 | 20.721 | 20.391 | 20.661 | 29.103 | 37.037 | 9.623  | 23.573 | 45.939 | 17.137 | 36.609 | 22.487 | 34.426 | 27.204 | 52.516 | 60.796  | 71.031 | 20.124 | 29.614 |        |
| 14.566 | 20.782 | 26.653 | 86.083 | 68.077 | 34.414 | 23.576 | 36.832 | 8.252  | 43.681 | 12.838 | 50.997 | 71.546 | 20.59  | 40.996 | 36.534 | 21.219 | 30.449 | 53.085 | 35.805 | 37.27  | 59.564 | 61.198  | 43.624 | 39.618 | 66.918 |        |
| 55.806 | 21.714 | 27.346 | 39.683 | 64.212 | 50.496 | 25.759 | 33.583 | 19.839 | 13.951 | 24.965 | 51.127 | 13.503 | 20.813 | 20.939 | 39.683 | 66.323 | 18.448 | 44.797 | 18.519 | 14.82  | 41.494 | 21.513  | 15.834 | 60.07  | 55.459 |        |
| 12.239 | 37.037 | 57.876 | 70.223 | 73.195 | 50.195 | 28.724 | 18.519 | 24.793 | 25.833 | 16.174 | 82.022 | 69.231 | 34.323 | 13.996 | 19.99  | 21.336 | 12.159 | 53.026 | 48.302 | 15.873 | 43.96  | 54.504  | 67.281 | 14.118 | 25.072 |        |
| 28.337 | 43.032 | 15.47  | 64.593 | 55.641 | 24.212 | 27.267 | 26.089 | 26.107 | 24.256 | 26.474 | 45.293 | 47.691 | 22.229 | 28.06  | 21.164 | 24.277 | 26.455 | 60.847 | 40.522 | 41.313 | 42.902 | 51.847  | 28.938 | 10.045 | 56.312 |        |
| 16.292 | 15.505 | 51.206 | 32.717 | 48.899 | 56.877 | 47.293 | 18.27  | 23.168 | 31.746 | 13.996 | 52.277 | 22.278 | 27.958 | 46.617 | 27.036 | 46.344 | 26.189 | 18.961 | 19.966 | 31.546 | 27.778 | 16.269  | 15.716 | 49.693 | 14.915 |        |
| 9.525  | 65.46  | 46.443 | 57.425 | 69.214 | 38.36  | 45.757 | 27.8   | 32.097 | 37.037 | 33.379 | 70.436 | 26.64  | 47.892 | 28.713 | 33.473 | 52.724 | 13.276 | 19.243 | 57.954 | 51.794 | 30.673 | 39.478  | 42.328 |        |        |        |

|        |        |        |        |        |        |        |        |        |        |        |        |        |        |        |        |        |        |        |        |        |        |         |        |        |        |
|--------|--------|--------|--------|--------|--------|--------|--------|--------|--------|--------|--------|--------|--------|--------|--------|--------|--------|--------|--------|--------|--------|---------|--------|--------|--------|
| 44.961 | 61.825 | 63.68  | 28.594 | 65.632 | 13.239 | 28.767 | 14.756 | 61.763 | 19.145 | 31.941 | 25.082 | 19.356 | 42.872 | 31.426 | 39.448 | 28.581 | 20.577 | 26.455 | 23.81  | 23.259 | 49.145 | 11.132  | 35.714 | 39.068 | 24.713 |
| 23.823 | 34.778 | 26.309 | 44.699 | 15.873 | 15.392 | 13.763 | 29.101 | 41.23  | 28.487 | 21.044 | 69.857 | 38.262 | 25.198 | 61.973 | 36.622 | 34.443 | 66.879 | 9.308  | 41.971 | 38.559 | 40.485 | 23.383  | 57.16  | 35.17  | 30.004 |
| 17.196 | 34.414 | 70.344 | 10.582 | 33.871 | 48.373 | 18.09  | 15.382 | 29.071 | 32.402 | 59.761 | 52.169 | 75.407 | 60.406 | 16.736 | 26.04  | 27.301 | 23.903 | 35.092 | 44.863 | 41.334 | 25.439 | 33.672  | 26.455 | 25.132 | 11.905 |
| 13.811 | 60.108 | 35.102 | 37.102 | 22.532 | 29.703 | 70.696 | 30.721 | 49.197 | 10.582 | 16.745 | 59.764 | 21.032 | 28.994 | 38.085 | 37.486 | 17.035 | 8.598  | 37.027 | 17.266 | 18.707 | 20     | 95.852  | 22.487 | 38.884 | 57.635 |
| 45.785 | 48.875 | 66.137 | 69.891 | 56.314 | 43.793 | 65.147 | 19.456 | 18.519 | 23.132 | 32.012 | 48.637 | 19.841 | 17.151 | 25.441 | 31.276 | 42.964 | 14.13  | 33.721 | 59.849 | 33.672 | 26.955 | 63.238  | 54.233 | 68.212 | 11.905 |
| 48.942 | 14.841 | 19.202 | 15.719 | 53.801 | 27.593 | 36.975 | 23.164 | 25.132 | 16.747 | 9.807  | 58.299 | 59.692 | 46.296 | 43.13  | 37.037 | 38.08  | 10.46  | 28.488 | 53.405 | 41.851 | 19.841 | 51.474  | 51.297 | 20.675 | 31.206 |
| 39.751 | 31.746 | 25.356 | 68.687 | 56.18  | 33.316 | 57.953 | 18.052 | 33.069 | 14.008 | 18.762 | 19.485 | 39.344 | 72.671 | 23.148 | 24.942 | 28.934 | 17.757 | 31.341 | 37.844 | 39.699 | 54.188 | 61.483  | 56.534 | 49.574 | 27.715 |
| 57.055 | 19.729 | 28.383 | 33.37  | 39.529 | 27.507 | 36.607 | 37.037 | 17.987 | 17.982 | 22.487 | 73.894 | 14.03  | 15.386 | 51.305 | 49.261 | 43.78  | 12.159 | 62.335 | 32.005 | 29.101 | 14.03  | 8.312   | 15.873 | 57.627 | 56.929 |
| 18.488 | 36.478 | 44.896 | 21.164 | 30.83  | 39.641 | 24.683 | 17.244 | 55.22  | 43.255 | 30.736 | 52.453 | 34.013 | 15.546 | 19.642 | 15.901 | 22.487 | 28.035 | 28.819 | 23.562 | 37.451 | 34.607 | 55.832  | 10.879 | 33.726 | 18.773 |
| 11.014 | 12.854 | 39.284 | 74.016 | 39.048 | 39.284 | 20.521 | 20.013 | 14.762 | 6.614  | 39.336 | 61.269 | 14.506 | 40.128 | 28.401 | 19.44  | 23.31  | 42.815 | 51.992 | 21.954 | 39.683 | 44.689 | 55.335  | 22.939 | 17.381 | 15.482 |
| 33.069 | 48.034 | 36.073 | 57.414 | 41.4   | 29.101 | 69.099 | 19.793 | 56.151 | 17.929 | 29.575 | 52.639 | 38.944 | 33.757 | 44.176 | 33.069 | 25.879 | 11.244 | 47.619 | 42.828 | 19.096 | 22.443 | 56.878  | 39.77  | 35.168 | 29.101 |
| 57.211 | 59.702 | 72.024 | 58.201 | 82.303 | 11.905 | 14.55  | 9.927  | 15.577 | 23.81  | 17.196 | 77.91  | 21.989 | 15.769 | 32.497 | 16.2   | 26.455 | 22.959 | 33.672 | 27.778 | 35.154 | 32.068 | 16.836  | 45.409 | 33.672 | 13.503 |
| 31.945 | 26.003 | 33.855 | 47.426 | 44.214 | 47.619 | 37.659 | 11.834 | 57.518 | 19.632 | 62.713 | 78.974 | 57.285 | 34.174 | 26.455 | 33.069 | 34.392 | 27.723 | 16.634 | 30.423 | 31.799 | 21.296 | 107.549 | 25.317 | 14.692 | 34.392 |
| 20.013 | 76.375 | 90.77  | 14.04  | 50.265 | 23.81  | 13.267 | 13.228 | 47.081 | 25.622 | 17.204 | 43.746 | 14.55  | 28.988 | 30.769 | 20.577 | 35.878 | 56.003 | 35.914 | 55.456 | 61.732 | 49.638 | 45.407  | 19.245 | 24.397 | 15.665 |
| 23.092 | 48.48  | 35.295 | 78.026 | 67.53  | 35.935 | 17.909 | 22.519 | 29.066 | 35.046 | 14.643 | 28.995 | 59.405 | 40.342 | 64.433 | 46.131 | 38.074 | 29.836 | 27.778 | 29.101 | 36.486 | 24.049 | 64.837  | 30.096 | 31.75  | 51.204 |
| 24.672 | 19.575 | 74.258 | 57.118 | 64.09  | 22.759 | 15.534 | 11.018 | 11.747 | 24.878 | 22.319 | 68.02  | 14.992 | 29.248 | 11.905 | 22.569 | 37.805 | 24.318 | 31.633 | 18.945 | 27.916 | 10.582 | 76.743  | 34.212 | 36.528 | 32.524 |
| 40.219 | 33.069 | 25.132 | 71.377 | 62.862 | 11.058 | 31.132 | 23.353 | 37.037 | 25.721 | 34.303 | 73.457 | 47.619 | 21.223 | 15.677 | 32.964 | 11.744 | 36.093 | 49.735 | 55.236 | 23.81  | 59.441 | 54.011  | 39.517 | 22.903 | 33.902 |
| 23.967 | 48.942 | 14.55  | 23.81  | 22.487 | 35.329 | 14.521 | 28.45  | 65.226 | 13.195 | 20.442 | 50.265 | 42.53  | 11.014 | 19.574 | 35.335 | 29.93  | 29.758 | 12.253 | 12.826 | 36.477 | 35.264 | 62.983  | 32.5   | 25.132 | 24.411 |
| 33.733 | 52.133 | 70.704 | 28.362 | 65.624 | 38.711 | 40.717 | 11.871 | 26.553 | 39.778 | 40.219 | 70.587 | 36.721 | 46.741 | 20.319 | 24.917 | 29.038 | 46.766 | 25.988 | 20.045 | 27.526 | 43.938 | 26.905  | 26.321 | 44.283 | 23.32  |
| 66.138 | 43.78  | 37.853 | 56.064 | 62.529 | 18.068 | 49.672 | 21.146 | 10.998 | 14.725 | 23.786 | 37.413 | 61.42  | 15.713 | 13.095 | 22.487 | 25.132 | 43.284 | 51.443 | 22.725 | 33.314 | 56.085 | 78.917  | 41.387 | 10.641 | 33.136 |
| 50.418 | 56.184 | 37.845 | 48.93  | 54.641 | 14.55  | 44.225 | 12.342 | 18.284 | 24.853 | 20.235 | 87.898 | 23.825 | 20.877 | 20.181 | 23.913 | 35.084 | 46.54  | 24.546 | 31.801 | 24.207 | 52.313 | 65      | 39.177 | 15.901 | 22.487 |
| 33.069 | 47.81  | 29.593 | 51.542 | 34.392 | 12.745 | 55.383 | 19.841 | 19.641 | 13.473 | 57.441 | 71.429 | 20.121 | 26.189 | 54.094 | 33.623 | 20.377 | 27.233 | 52.708 | 26.908 | 42.955 | 63.2   | 30.866  | 53.314 | 27.692 | 54.633 |
| 8.74   | 40.254 | 52.082 | 55.556 | 9.215  | 56.735 | 36.139 | 23.018 | 63.531 | 25.035 | 14.03  | 54.112 | 42.327 | 24.276 | 11.838 | 13.228 | 18.805 | 38.36  | 76.753 | 15.498 | 35.542 | 10.289 | 99.206  | 49.378 | 34.527 | 39.77  |
| 14.768 | 56.653 | 41.97  | 55.89  | 47.409 | 27.901 | 25.132 | 23.186 | 30.129 | 21.164 | 43.799 | 49.48  | 19.841 | 18.265 | 54.724 | 13.461 | 23.877 | 10.749 | 51.318 | 43.508 | 24.135 | 10.582 | 22.844  | 34.994 | 35.432 | 16.566 |
| 22.89  | 30.821 | 76.996 | 68.783 | 30.784 | 25.132 | 34.286 | 12.732 | 57.008 | 16.906 | 29.886 | 53.213 | 25.062 | 27.917 | 19.841 | 28.39  | 49.3   | 16.104 | 26.776 | 51.913 | 45.403 | 32.727 | 22.906  | 51.076 | 56.117 | 32.18  |
| 32.257 | 20.958 | 47.352 | 25.132 | 15.873 | 47.786 | 11.719 | 23.422 | 52.551 | 45.681 | 56.204 | 45.828 | 40.055 | 19.724 | 31.746 | 16.583 | 31.984 | 56.347 | 26.455 | 45.177 | 30.444 | 34.344 | 41.94   | 36.827 | 38.36  | 42.649 |
| 22.487 | 52.228 | 53.847 | 59.981 | 58.753 | 44.398 | 40.752 | 46.505 | 15.778 | 11.905 | 22.779 | 36.677 | 60.847 | 14.223 | 27.995 | 59.593 | 19.841 | 29.93  | 24.687 | 18.72  | 26.956 | 46.021 | 54.9    | 16.705 | 39.155 | 27.047 |
| 15.891 | 71.429 | 50.131 | 57.209 | 26.846 | 49.572 | 21.318 | 18.185 | 34.292 | 24.287 | 36.084 | 58.426 | 17.196 | 31.395 | 29.725 | 29.272 | 37.779 | 37.02  | 41.908 | 49.392 | 31.801 | 18.519 | 50.66   | 34.215 | 38.588 | 31.067 |
| 74.283 | 13.228 | 47.619 | 13.228 | 11.012 | 54.089 | 18.832 | 32.621 | 28.693 | 37.588 | 34.449 | 50.09  | 27.217 | 22.487 | 32.966 | 28.337 | 35.833 | 37.196 | 17.16  | 26.629 | 34.392 | 29.467 | 38.433  | 44.699 | 20.313 | 12.44  |
| 15.166 | 36.478 | 43.655 | 43.651 | 62.94  | 20.419 | 43.269 | 18.472 | 39.313 | 13.228 | 25.644 | 37.009 | 33.873 | 18.519 | 42.521 | 21.816 | 23.81  | 54.233 | 33.332 | 61.992 | 16.712 | 35.714 | 15.59   | 51.587 | 50.265 | 59.351 |
| 31.162 | 37.432 | 52.964 | 22.448 | 68.48  | 46.271 | 51.587 | 35.542 | 35.173 | 33.357 | 25.124 | 85.949 | 14.977 | 22.105 | 25.864 | 19.642 | 55.944 | 14.118 | 25.969 | 62.738 | 61.732 | 65.473 | 27.124  | 55.168 | 38.188 | 24.139 |
| 49.118 | 12.36  | 17.891 | 21.164 | 15.577 | 36.762 | 43.993 | 13.808 | 56.045 | 30.851 | 18.519 | 24.93  | 26.953 | 71.073 | 15.547 | 26.455 | 44.967 | 13.555 | 36.35  | 38.156 | 50.265 | 12.808 | 96.283  | 44.433 | 17.196 | 60.293 |
| 19.841 | 42.2   | 41.747 | 21.513 | 68.666 | 31.746 | 24.626 | 12.899 | 55.982 | 33.672 | 32.539 | 47.292 | 28.515 | 25.254 | 16.965 | 42.405 | 13.095 | 12.004 | 35.714 | 36.694 | 31.984 | 24.886 | 44.544  | 26.581 | 25.132 | 37.591 |
| 28.081 | 51.879 | 71.445 | 79.323 | 64.731 | 14.55  | 48.075 | 21.164 | 64.744 | 26.455 | 37.037 | 27.953 | 66.423 | 20.774 | 30.661 | 15.069 | 14.281 | 32.977 | 29.381 | 49.091 | 45.534 | 35.563 | 76.643  | 34.392 | 30.288 | 27.381 |
| 33.069 | 55.736 | 56.878 | 47.736 | 62.499 | 28.344 | 37.022 | 10.111 | 12.962 | 34.547 | 29.954 | 52.378 | 35.76  | 65.595 | 18.934 | 39.294 | 28.365 | 46.161 | 26.58  | 33.655 | 13.228 | 27.901 | 47.954  | 47.391 | 15.55  | 35.374 |
| 15.237 | 47.537 | 52.61  | 55.556 | 74.074 | 38.535 | 44.974 | 19.642 | 32.818 | 14.873 | 12.3   | 37.39  | 69.751 | 23.411 | 50.318 | 35.643 | 44.974 | 28.105 | 20.958 | 20.577 | 30.32  | 44.762 | 75.091  | 35.714 | 63.781 | 44.672 |
| 20.969 | 22.487 | 41.307 | 74.213 | 17.196 | 45.791 | 53.039 | 30.296 | 21.164 | 29.295 | 17.196 | 12.65  | 35.714 | 40.192 | 28.865 | 17.196 | 39.696 | 17.196 | 25.212 | 45.694 | 27.52  | 27.778 | 54.058  | 39.958 | 58.341 | 16.529 |
| 21.758 | 69.654 | 40.933 | 66.972 | 35.979 | 45.788 | 24.007 | 23.383 | 10.688 | 24.398 | 19.841 | 50.425 | 36.606 | 59.154 | 26.161 | 26.455 | 18.786 | 17.571 | 25.621 | 44.922 | 27.054 | 38.712 | 65.136  | 27.778 | 54.7   | 38.806 |
| 31.064 | 55.163 | 94.345 | 13.388 | 75.052 | 52.294 | 17.196 | 22.423 | 16.318 | 41.361 | 33.348 | 75.291 | 34.157 | 20.788 | 19.524 | 24.697 | 15.873 | 7.872  | 41.93  | 53.821 | 39.712 | 10.651 | 57.594  | 48.56  | 19.631 | 10.609 |
| 60.549 | 15.873 | 94.841 | 74.356 | 79.503 | 32.998 | 26.401 | 15.733 | 44.69  | 47.362 | 16.836 | 70.188 | 50.048 | 25.874 | 17.938 | 29.93  | 22.229 | 23.742 | 47.921 | 50.699 | 14.55  | 20.775 | 54.866  | 19.739 | 20.148 | 38.622 |
| 13.808 | 69.411 | 63.937 | 74.074 | 60.135 | 48.942 | 15.873 | 14.55  | 17.95  | 18.35  | 45.938 | 80.226 | 39.654 | 10.891 | 24.359 | 15.557 | 28.401 | 20.117 | 34.174 | 32.174 | 17.468 | 16.966 | 62.08   | 26.623 | 36.073 | 52.738 |
| 55.556 | 9.304  | 39.304 | 35.714 | 52.866 | 30.519 | 39.406 | 18.378 | 42.539 | 24.277 | 15.558 | 45.999 | 25.254 | 26.633 | 29.113 | 41.875 | 12.835 | 33.528 | 17.87  | 63.714 | 19.609 | 42.328 | 46.777  | 57.018 | 26.441 | 16.736 |
| 40.565 | 47.619 | 68.74  | 36.106 | 36.693 | 18.262 | 26.189 | 24.318 | 17.905 | 21.369 | 26.255 | 78.834 | 13.228 | 55.129 | 12.848 | 8.988  | 19.209 | 18.917 | 40.198 | 39.301 | 43.651 | 15.485 | 49.897  |        |        |        |



|        |        |        |        |        |        |        |        |        |        |        |        |         |        |        |        |        |        |        |        |        |        |        |        |        |        |
|--------|--------|--------|--------|--------|--------|--------|--------|--------|--------|--------|--------|---------|--------|--------|--------|--------|--------|--------|--------|--------|--------|--------|--------|--------|--------|
| 31.023 | 42.519 | 17.436 | 71.723 | 46.812 | 70.597 | 55.917 | 23.81  | 39.638 | 23.81  | 31.21  | 48.667 | 54.695  | 32.493 | 19.259 | 25.24  | 48.942 | 21.318 | 53.554 | 48.35  | 45.782 | 34.392 | 54.987 | 12.159 | 52.898 | 21.859 |
| 47.619 | 36.843 | 26.787 | 63.144 | 19.524 | 41.415 | 41.042 | 28.614 | 57.814 | 35.622 | 50.847 | 76.318 | 31.765  | 52.942 | 49.804 | 43.431 | 19.177 | 24.387 | 42.645 | 26.769 | 29.101 | 34.154 | 71.366 | 25.138 | 14.767 | 19.259 |
| 39.266 | 85.752 | 54.508 | 54.109 | 52.177 | 50.063 | 40.996 | 19.841 | 42.328 | 18.519 | 11.851 | 51.088 | 27.778  | 28.751 | 23.669 | 18.934 | 63.899 | 27.778 | 42.792 | 41.696 | 36.499 | 23.81  | 79.693 | 23.031 | 54.181 | 13.228 |
| 62.447 | 33.853 | 72.47  | 30.423 | 52.91  | 65.554 | 48.312 | 14.799 | 32.632 | 46.614 | 22.672 | 77.303 | 45.608  | 21.006 | 52.901 | 15.787 | 22.319 | 43.775 | 62.169 | 45.815 | 10.956 | 23.241 | 87.213 | 25.542 | 63.276 | 43.124 |
| 19.642 | 37.703 | 37.839 | 31.362 | 77.722 | 35.179 | 40.359 | 19.968 | 20.4   | 47.304 | 17.771 | 60.524 | 65.695  | 17.987 | 19.841 | 23.81  | 52.292 | 58.572 | 45.705 | 26.189 | 37.378 | 19.277 | 87.498 | 25.949 | 45.727 | 42.718 |
| 58.859 | 44.446 | 79.65  | 30.689 | 64.292 | 21.989 | 18.316 | 14.643 | 34.319 | 28.419 | 18.693 | 68.894 | 54.962  | 42.566 | 36.868 | 34.392 | 86.363 | 41.678 | 31.337 | 18.083 | 35.57  | 21.791 | 27.977 | 24.853 | 47.73  | 50.832 |
| 35.977 | 44.845 | 43.025 | 13.575 | 74.37  | 60.847 | 11.977 | 31.566 | 19.513 | 25.378 | 33.069 | 35.714 | 52.786  | 32.908 | 12.727 | 15.313 | 49.399 | 22.995 | 42.931 | 10.168 | 38.391 | 28.446 | 55.806 | 28.53  | 17.648 | 19.53  |
| 21.105 | 23.81  | 41.005 | 72.071 | 64.894 | 53.425 | 56.486 | 64.017 | 34.885 | 35.183 | 52.293 | 54.211 | 8.332   | 42.312 | 11.521 | 48.16  | 29.246 | 71.321 | 56.047 | 32.202 | 30.423 | 35.275 | 48.623 | 17.984 | 10.464 | 16.836 |
| 12.449 | 51.443 | 46.254 | 10.582 | 13.515 | 16.768 | 30.423 | 16.263 | 22.542 | 26.455 | 17.196 | 65.155 | 15.645  | 21.164 | 54.616 | 33.716 | 56.421 | 34.919 | 25.132 | 23.372 | 20.577 | 13.641 | 46.857 | 45.916 | 27.085 | 23.22  |
| 34.392 | 36.7   | 30.136 | 80.772 | 53.461 | 59.475 | 80.688 | 28.426 | 27.196 | 13.808 | 9.224  | 45.681 | 11.254  | 15.787 | 17.196 | 15.661 | 37.616 | 24.539 | 55.568 | 13.839 | 25.172 | 33.808 | 60.939 | 10.582 | 27.692 | 20.652 |
| 31.746 | 28.45  | 32.657 | 78.521 | 21.513 | 20.807 | 42.139 | 29.835 | 60.069 | 30.695 | 26.455 | 43.402 | 30.847  | 13.21  | 15.906 | 68.279 | 56.878 | 11.224 | 50.028 | 13.154 | 28.563 | 41.191 | 62.079 | 16.229 | 35.335 | 11.744 |
| 26.455 | 39.403 | 37.378 | 16.644 | 69.214 | 49.102 | 38.513 | 15.577 | 48.811 | 43.651 | 51.737 | 56.586 | 60.625  | 69.373 | 26.21  | 31.746 | 54.96  | 30.125 | 28.141 | 25.346 | 42.328 | 27.503 | 20.724 | 34.392 | 32.947 | 43.519 |
| 45.738 | 15.237 | 30.89  | 67.338 | 70.986 | 58.926 | 71.07  | 21.164 | 24.711 | 30.712 | 27.64  | 34.704 | 51.803  | 28.718 | 28.526 | 35.503 | 37.631 | 23.81  | 31.22  | 53.334 | 61.376 | 25.202 | 26.221 | 33.904 | 42.631 | 16.59  |
| 25.613 | 37.958 | 25.248 | 15.047 | 72.62  | 23.765 | 55.556 | 22.371 | 38.641 | 15.386 | 39.183 | 39.683 | 9.826   | 21.752 | 26.455 | 26.189 | 28.85  | 17.16  | 16.634 | 8.824  | 19.841 | 41.757 | 41.617 | 18.519 | 34.295 | 13.612 |
| 71.839 | 31.069 | 21.164 | 17.707 | 80.507 | 30.565 | 46.082 | 25.522 | 60.117 | 11.905 | 29.76  | 45.754 | 25.132  | 35.131 | 19.841 | 27.484 | 23.169 | 32.511 | 26.054 | 25.204 | 54.433 | 50.626 | 46.719 | 21.379 | 18.177 | 14.567 |
| 60.828 | 33.069 | 64.459 | 56.158 | 48.879 | 9.569  | 56.071 | 26.255 | 18.343 | 51.071 | 38.92  | 21.534 | 75.036  | 52.378 | 50.148 | 20.556 | 22.462 | 36.075 | 16.747 | 29.875 | 29.992 | 19.356 | 53.532 | 28.349 | 34.676 | 14.55  |
| 13.1   | 58.181 | 18.092 | 69.523 | 80.954 | 26.009 | 14.03  | 21.164 | 38.36  | 50.101 | 31.483 | 69.061 | 39.043  | 45.412 | 21.164 | 39.484 | 36.658 | 21.164 | 47.987 | 27.281 | 25.018 | 39.474 | 17.184 | 17.246 | 63.406 | 49.799 |
| 44.994 | 13.237 | 14.03  | 26.455 | 61.916 | 9.472  | 24.091 | 46.21  | 49.401 | 34.186 | 22.487 | 44.974 | 79.365  | 22.487 | 11.927 | 18.519 | 13.018 | 34.045 | 71.182 | 55.184 | 28.411 | 37.982 | 7.693  | 20.218 | 24.357 | 38.36  |
| 67.599 | 41.707 | 75.862 | 61.461 | 58.31  | 16.841 | 42.914 | 21.865 | 37.616 | 34.896 | 42.584 | 65.498 | 39.134  | 23.541 | 32.643 | 30.922 | 17.196 | 54.934 | 21.653 | 48.974 | 26.629 | 49.408 | 49.389 | 47.619 | 37.851 | 27.273 |
| 12.117 | 46.718 | 27.43  | 53.84  | 71.408 | 64.528 | 33.041 | 12.159 | 31.427 | 15.873 | 22.418 | 12.948 | 13.095  | 13.095 | 20.577 | 13.095 | 18.448 | 28.06  | 32.388 | 25.132 | 11.358 | 46.032 | 64.336 | 60.664 | 49.968 | 31.125 |
| 32.404 | 54.551 | 64.962 | 52.074 | 19.841 | 49.761 | 40.539 | 21.089 | 26.304 | 42.372 | 52.065 | 78.139 | 59.786  | 49.37  | 54.233 | 15.011 | 26.425 | 47.174 | 42.613 | 27.223 | 18.519 | 43.936 | 72.692 | 28.584 | 39.466 | 63.605 |
| 31.92  | 49.425 | 40.434 | 37.864 | 31.564 | 42.499 | 57.09  | 24.831 | 42.002 | 34.967 | 21.681 | 84.509 | 36.1    | 11.905 | 61.422 | 40.055 | 78.092 | 22.405 | 31.38  | 48.853 | 48.075 | 29.426 | 32.955 | 18.42  | 31.447 | 91.825 |
| 25.946 | 9.347  | 57.475 | 39.678 | 49.793 | 29.101 | 55.31  | 16.836 | 32.188 | 26.316 | 15.054 | 31.801 | 46.337  | 32.095 | 19.169 | 36.076 | 13.228 | 12.515 | 74.345 | 29.361 | 32.297 | 38.082 | 48.406 | 56.028 | 54.934 | 71.679 |
| 20.711 | 25.548 | 42.328 | 92.898 | 18.723 | 17.028 | 73.794 | 26.5   | 34.607 | 27.66  | 23.051 | 16.686 | 82.669  | 54.927 | 52.91  | 26.455 | 33.794 | 55.295 | 18.942 | 30.027 | 14.55  | 39.725 | 53.314 | 20.647 | 12.341 | 10.651 |
| 33.888 | 44.974 | 37.505 | 18.519 | 36.349 | 19.841 | 26.632 | 17.068 | 15.873 | 27.221 | 19.876 | 56.811 | 101.769 | 34.392 | 40.215 | 10.582 | 25.033 | 11.33  | 33.291 | 11.905 | 34.32  | 50.234 | 69.54  | 44.464 | 48.983 | 51.236 |
| 46.296 | 62.675 | 36.93  | 52.409 | 24.735 | 70.89  | 19.418 | 15.973 | 28.792 | 13.095 | 9.259  | 83.021 | 29.747  | 50.629 | 45.695 | 45.977 | 23.848 | 64.815 | 47.691 | 29.101 | 32.545 | 11.558 | 55.184 | 21.164 | 22.901 | 15.834 |
| 25.538 | 50.124 | 57.429 | 55.611 | 9.259  | 59.524 | 18.124 | 42.009 | 33.871 | 22.612 | 39.683 | 25.6   | 59.01   | 37.037 | 42.585 | 13.022 | 39.661 | 18.41  | 22.407 | 20.718 | 49.011 | 18.93  | 39.618 | 18.519 | 39.022 | 65.244 |
| 36.953 | 45.382 | 43.203 | 83.669 | 51.88  | 34.055 | 22.856 | 14.442 | 65.792 | 36.105 | 9.017  | 28.156 | 21.21   | 30.863 | 42.312 | 49.492 | 21.513 | 21.431 | 42.984 | 40.852 | 22.526 | 41.154 | 9.353  | 13.612 | 55.083 | 59.524 |
| 48.991 | 22.487 | 22.686 | 47.168 | 25.695 | 63.13  | 58.539 | 36.093 | 11.421 | 11.905 | 39.655 | 51.223 | 21.898  | 28.753 | 30.624 | 49.791 | 29.251 | 25.132 | 51.831 | 42.599 | 31.367 | 28.397 | 22.487 | 33.142 | 16.844 | 86.607 |
| 64.579 | 39.633 | 51.733 | 13.228 | 52.642 | 63.567 | 36.538 | 23.506 | 47.351 | 12.854 | 15.386 | 66.216 | 41.298  | 26.084 | 11.063 | 13.883 | 27.778 | 18.707 | 13.27  | 38.964 | 27.596 | 12.843 | 56.878 | 31.003 | 28.633 | 61.732 |
| 41.106 | 45.773 | 52.91  | 21.164 | 43.651 | 64.325 | 9.259  | 18.472 | 17.4   | 21.308 | 39.301 | 80.818 | 32.99   | 48.593 | 64     | 35.443 | 31.746 | 38.422 | 31.583 | 28.863 | 55.401 | 39.901 | 88.681 | 18.873 | 45.459 | 27.599 |
| 46.296 | 12.024 | 25.132 | 63.061 | 48.029 | 51.867 | 14.55  | 27.526 | 55.134 | 23.116 | 12.719 | 67.302 | 33.069  | 63.013 | 53.356 | 9.259  | 24.849 | 33.622 | 27.778 | 26.012 | 35.187 | 31.984 | 50.508 | 46.161 | 52.378 | 31.746 |
| 35.45  | 44.31  | 52.946 | 22.029 | 20.378 | 42.985 | 69.422 | 14.771 | 23.694 | 28.269 | 15.81  | 48.485 | 11.235  | 48.485 | 57.434 | 27.322 | 32.966 | 15.565 | 41.004 | 15.115 | 30.599 | 34.226 | 43.25  | 17.402 | 18.343 | 41.422 |
| 44.208 | 50.375 | 64.487 | 31.931 | 18.088 | 61.55  | 48.106 | 17.292 | 19.876 | 19.841 | 20.5   | 77.295 | 27.066  | 13.228 | 65.829 | 12.852 | 12.425 | 20.929 | 24.362 | 31.519 | 11.397 | 14.618 | 52.684 | 42.507 | 69.572 | 42.991 |
| 29.024 | 44.588 | 68.542 | 19.895 | 55.501 | 21.819 | 14.895 | 26.22  | 33.649 | 16.648 | 41.397 | 60.847 | 46.481  | 28.217 | 23.81  | 10.122 | 27.778 | 37.953 | 25.678 | 35.518 | 38.319 | 44.698 | 52.636 | 40.407 | 67.916 | 34.128 |
| 37.166 | 77.946 | 42.443 | 58.064 | 57.975 | 55.006 | 21.295 | 50.552 | 57.553 | 26.776 | 42.371 | 31.365 | 41.419  | 36.078 | 33.471 | 34.861 | 8.631  | 15.873 | 28.227 | 35.348 | 29.356 | 31.686 | 54.233 | 57.285 | 19.085 | 70.106 |
| 39.262 | 20.714 | 80.148 | 80.902 | 60.851 | 76.368 | 12.341 | 13.228 | 40.193 | 23.81  | 12.797 | 64.433 | 79.772  | 10.289 | 48.331 | 17.698 | 39.284 | 12.342 | 28.404 | 17.371 | 23.132 | 47.453 | 67.12  | 38.971 | 43.527 | 13.228 |
| 50.048 | 20.448 | 71.777 | 68.25  | 45.839 | 80.241 | 33.136 | 14.55  | 67.093 | 16.508 | 24.318 | 49.901 | 23.853  | 29.101 | 20.577 | 11.698 | 32.407 | 46.237 | 21.552 | 24.806 | 30.885 | 45.115 | 18.54  | 11.299 | 55.556 | 46.436 |
| 16.317 | 66.808 | 66.697 | 80.165 | 40.081 | 52.689 | 81.014 | 15.655 | 50.691 | 16.46  | 17.689 | 73.707 | 55.939  | 21.164 | 38.978 | 35.542 | 34.646 | 10.651 | 28.06  | 54.869 | 26.455 | 37.544 | 56.635 | 7.937  | 54.347 | 10.582 |
| 10.582 | 27.778 | 55.208 | 37.037 | 61.54  | 86.805 | 26.73  | 10.582 | 46.296 | 34.316 | 34.392 | 72.063 | 16.346  | 46.181 | 23.964 | 9.528  | 30.633 | 32.889 | 21.173 | 26.284 | 20.92  | 40.156 | 54.207 | 26.455 | 24.521 | 32.221 |
| 10.513 | 26.147 | 39.595 | 61.186 | 17.16  | 77.098 | 23.81  | 14.538 | 35.953 | 12.721 | 59.165 | 56.639 | 17.847  | 26.455 | 51.022 | 20.318 | 18.697 | 17.75  | 37.593 | 15.834 | 44.442 | 20.577 | 52.625 | 51.443 | 26.026 | 12.159 |
| 32.831 | 25.132 | 34.068 | 42.172 | 48.923 | 56.113 | 51.88  | 11.224 | 54.987 | 10.582 | 42.227 | 49.859 | 16.661  | 59.694 | 12.721 | 57.391 | 27.906 | 9.08   | 21.552 | 65.978 | 34.295 | 28.099 | 42.881 | 42.012 | 30.821 | 43.621 |
| 47.248 | 78.341 | 50.265 | 32.013 | 55.661 | 16.736 | 33.174 | 28.654 | 27.964 | 33.306 | 15.843 | 68.91  | 18.519  | 45.791 | 52.653 | 50.784 | 79.903 | 48.768 | 11.905 | 14.232 | 22.328 | 18.935 | 38.44  |        |        |        |

|        |  |        |        |        |        |        |        |        |        |        |        |         |        |        |        |        |        |        |        |        |        |        |        |        |        |
|--------|--|--------|--------|--------|--------|--------|--------|--------|--------|--------|--------|---------|--------|--------|--------|--------|--------|--------|--------|--------|--------|--------|--------|--------|--------|
| 21.164 |  | 51.783 | 44.581 | 76.939 | 29.682 | 12.159 | 42.372 | 59.281 | 45.343 | 13.775 | 65.427 | 55.965  | 32.994 | 11.479 | 41.005 | 14.55  | 29.727 | 28.989 | 69.484 | 29.734 | 31.872 | 22.035 | 11.801 | 17.196 | 35.603 |
| 61.682 |  | 38.15  | 62.788 | 72.923 | 54.228 | 21.003 | 9.259  | 30.97  | 13.228 | 66.01  | 47.913 | 22.225  | 32.67  | 16.836 | 20.682 | 12.622 | 21.305 | 44.19  | 12.798 | 15.873 | 56.12  | 47.011 | 7.937  | 45.831 | 17.196 |
|        |  | 49.272 | 81.475 | 43.142 | 43.96  | 57.951 | 43.928 | 48.54  | 23.762 | 30.252 | 57.578 | 24.687  | 17.571 | 69.183 | 22.55  | 28.887 | 19.841 | 39.683 | 10.582 | 42.328 | 54.061 | 17.912 | 25.132 | 39.435 | 30.964 |
|        |  | 77.653 | 71.715 | 25.132 | 14.281 | 51.158 | 23.504 | 40.915 | 36.674 | 33.205 | 26.972 | 34.312  | 17.015 | 35.133 | 37.037 | 44.601 | 16.573 | 14.55  | 15.873 | 32.67  | 24.262 | 14.792 | 12.967 | 47.721 | 34.895 |
|        |  | 54.876 | 62.109 | 20.212 | 41.112 | 52.51  | 19.841 | 10.592 | 30.492 | 48.942 | 37.948 | 31.203  | 32.378 | 30.495 | 25.132 | 61.201 | 19.841 | 35.578 | 48.303 | 17.196 | 46.296 | 39.683 | 26.659 | 32.834 | 14.182 |
|        |  | 65.745 | 21.045 | 46.434 | 26.881 | 46.03  | 66.408 | 18.608 | 44.72  | 15.873 | 39.245 | 26.455  | 49.917 | 24.066 | 57.978 | 43.083 | 23.81  | 44.803 | 33.652 | 55.516 | 13.155 | 27.778 | 16.306 | 57.385 | 14.55  |
|        |  | 7.937  | 27.778 | 21.023 | 56.015 | 64.187 | 19.524 | 28.858 | 27.144 | 45.502 | 72.922 | 49.499  | 31.564 | 26.263 | 26.91  | 12.768 | 20.653 | 59.035 | 43.561 | 34.296 | 15.901 | 48.463 | 70.106 | 78.545 | 55.04  |
|        |  | 32.367 | 18.604 | 39.063 | 51.587 | 37.444 | 30.768 | 26.298 | 21.028 | 34.149 | 58.93  | 20.038  | 18.937 | 48.942 | 36.58  | 31.379 | 15.834 | 44.431 | 47.207 | 10.366 | 35.666 | 43.025 | 33.543 | 23.863 | 25.394 |
|        |  | 47.931 | 56.878 | 60.786 | 71.79  | 43.349 | 17.771 | 21.719 | 27.363 | 34.428 | 53.063 | 30.423  | 18.707 | 34.797 | 46.127 | 10.582 | 24.25  | 21.352 | 71.525 | 20.094 | 27.692 | 66.745 | 15.873 | 63.141 | 48.665 |
|        |  | 75.269 | 17.113 | 39.82  | 29.923 | 50.265 | 13.228 | 52.063 | 14.643 | 34.018 | 97.884 | 26.455  | 57.386 | 67.231 | 40.606 | 20.387 | 34.392 | 76.131 | 10.289 | 34.408 | 35.599 | 82.776 | 32.216 | 22.585 | 21.048 |
|        |  | 15.725 | 49.695 | 60.393 | 55.184 | 24.806 | 22.487 | 21.301 | 42.576 | 22.487 | 70.549 | 27.778  | 55.268 | 18.707 | 28.726 | 28.613 | 16.514 | 42.885 | 45.279 | 13.095 | 39.683 | 60.939 | 19.757 | 61.21  | 41.494 |
|        |  | 63.492 | 77.828 | 47.503 | 18.519 | 35.3   | 24.259 | 19.654 | 39.058 | 25.132 | 22.173 | 33.602  | 32.334 | 37.812 | 49.572 | 24.823 | 22.716 | 12.321 | 15.784 | 18.672 | 27.167 | 48.117 | 32.214 | 46.416 | 24.622 |
|        |  | 19.524 | 71.287 | 55.382 | 76.57  | 18.519 | 19.026 | 38.776 | 56.745 | 21.594 | 97.561 | 38.537  | 45.328 | 12.835 | 25.132 | 42.932 | 19.841 | 15.577 | 42.859 | 20.142 | 53.483 | 30.423 | 34.179 | 20.958 | 40.098 |
|        |  | 59.523 | 53.451 | 28.131 | 60.847 | 26.814 | 30.049 | 42.328 | 36.368 | 53.453 | 95.486 | 26.582  | 102.84 | 26.455 | 42.121 | 25.837 | 53.765 | 23.825 | 47.531 | 44.697 | 52.055 | 26.067 | 30.778 | 70.448 | 47.846 |
|        |  | 40.043 | 46.031 | 48.438 | 54.437 | 66.635 | 12.353 | 34.926 | 25.132 | 20.949 | 47.83  | 44.326  | 34.84  | 44.213 | 32.449 | 17.196 | 65.185 | 22.448 | 38.247 | 37.885 | 27.598 | 57.278 | 83.871 | 36.639 | 26.474 |
|        |  | 64.536 | 42.328 | 12.666 | 41.689 | 20.278 | 20.577 | 18.825 | 34.392 | 24.744 | 49.71  | 16.573  | 47.537 | 25.464 | 30.8   | 28.401 | 22.915 | 51.644 | 51.195 | 64.183 | 23.428 | 39.878 | 21.6   | 10.582 | 65.421 |
|        |  | 22.855 | 71.108 | 58.059 | 66.674 | 26.189 | 19.915 | 20.577 | 32.909 | 33.873 | 28.479 | 23.81   | 8.418  | 15.453 | 51.372 | 21.451 | 28.496 | 48.074 | 10.624 | 80.259 | 35.364 | 52.739 | 30.069 | 58.603 | 20.287 |
|        |  | 66.885 | 36.386 | 41.419 | 49.44  | 57.295 | 23.626 | 31.688 | 10.804 | 41.695 | 56.235 | 68.165  | 16.368 | 29.914 | 22.229 | 26.455 | 56.523 | 36.294 | 18.83  | 36.701 | 12.911 | 20.919 | 59.055 | 25.132 |        |
|        |  | 78.115 | 83.021 | 50.292 | 52.304 | 26.455 | 19.281 | 10.582 | 11.905 | 13.045 | 79.833 | 49.572  | 10.641 | 19.477 | 37.611 | 26.373 | 45.028 | 66.001 | 24.501 | 15.873 | 50.634 | 61.732 | 13.612 | 18.934 | 58.144 |
|        |  | 43.112 | 61.067 | 14.118 | 23.085 | 61.539 | 19.751 | 28.249 | 30.134 | 20.992 | 16.564 | 35.06   | 16.836 | 37.99  | 31.746 | 44.51  | 16.788 | 22.498 | 21.1   | 34.841 | 33.026 | 59.524 | 14.405 | 17.196 | 45.956 |
|        |  | 24.849 | 41.926 | 16.92  | 26.455 | 30.14  | 15.267 | 10.386 | 39.683 | 25.132 | 53.201 | 29.493  | 27.267 | 35.714 | 44.589 | 61.563 | 35.714 | 48.117 | 27.217 | 34.515 | 32.728 | 60.012 | 23.874 | 16.503 | 54.363 |
|        |  | 64.573 | 47.676 | 57.99  | 23.561 | 43.199 | 25.949 | 20.692 | 31.583 | 22.248 | 59.491 | 100.581 | 48.942 | 25.132 | 23.487 | 34.816 | 29.793 | 11.905 | 49.854 | 33.069 | 15.873 | 21.532 | 56.578 | 47.585 | 23.507 |
|        |  | 62.743 | 52.338 | 44.458 | 49.466 | 31.6   | 15.873 | 11.905 | 23.113 | 31.172 | 71.428 | 36.38   | 15.834 | 36.571 | 46.607 | 17.447 | 29.076 | 23.13  | 32.736 | 22.487 | 27.155 | 24.671 | 66.821 | 47.913 | 55.922 |
|        |  | 55.621 | 44.896 | 75.101 | 25.132 | 18.279 | 10.582 | 47.453 | 9.343  | 36.075 | 46.136 | 35.666  | 23.81  | 27.778 | 17.645 | 25.799 | 41.005 | 35.528 | 14.55  | 24.856 | 17.95  | 38.693 | 34.14  | 23.376 | 32.223 |
|        |  | 58.171 | 41.137 | 46.997 | 43.919 | 66.483 | 19.665 | 18.519 | 18.519 | 34.392 | 57.273 | 11.747  | 34.392 | 17.16  | 18.519 | 33.291 | 25.833 | 26.448 | 12.216 | 48.661 | 11.238 | 53.382 | 13.629 | 26.64  | 50.73  |
|        |  | 27.503 | 67.346 | 31.086 | 77.453 | 45.134 | 12.588 | 42.09  | 32.819 | 39.324 | 21.164 | 31.494  | 54.136 | 33.069 | 39.048 | 24.579 | 16.836 | 30.423 | 11.905 | 19.793 | 19.915 | 21.164 | 12.913 | 27.598 | 28.91  |
|        |  | 52.697 | 82.23  | 61.459 | 64.62  | 48.097 | 19.966 | 26.081 | 17.028 | 30.707 | 72.764 | 80.867  | 17.771 | 19.531 | 47.429 | 29.079 | 27.482 | 43.651 | 37.995 | 34.371 | 10.582 | 19.607 | 50.006 | 26.091 | 36.843 |
|        |  | 47.853 | 74.561 | 53.046 | 60.578 | 20.141 | 22.301 | 30.423 | 35.448 | 33.132 | 33.837 | 15.873  | 17.731 | 15.873 | 19.747 | 25.169 | 17.208 | 22.487 | 13.28  | 43.651 | 68.039 | 56.758 | 37.037 | 24.507 | 14.55  |
|        |  | 59.908 | 61.235 | 10.073 | 60.561 | 26.863 | 13.924 | 33.84  | 11.905 | 51.853 | 46.891 | 89.685  | 58.201 | 25.449 | 31.7   | 24.453 | 26.633 | 35.978 | 39.875 | 19.895 | 10.868 | 74.347 | 60.022 | 56.962 | 44.96  |
|        |  | 68.771 | 58.344 | 11.905 | 66.459 | 48.463 | 26.8   | 44.977 | 14.55  | 18.519 | 41.005 | 18.519  | 68.242 | 12.531 | 30.423 | 23.218 | 35.507 | 19.374 | 57.99  | 15.574 | 49.093 | 61.098 | 30.217 | 52.476 | 39.484 |
|        |  | 28.317 | 75.074 | 36.886 | 70.258 | 64.806 | 15.445 | 38.752 | 30.313 | 29.546 | 42.275 | 56.67   | 22.036 | 37.306 | 18.937 | 27.728 | 50.265 | 25.542 | 18.519 | 19.994 | 17.991 | 53.9   | 34.288 | 49.579 | 17.637 |
|        |  | 46.08  | 75.937 | 46.456 | 10.289 | 76.733 | 21.305 | 22.487 | 35.163 | 38.834 | 51.597 | 21.506  | 20.504 | 19.841 | 26.255 | 15.242 | 11.014 | 43.046 | 26.424 | 15.326 | 24.618 | 46.088 | 19.976 | 38.606 | 49.9   |
|        |  | 64.481 | 69.815 | 15.873 | 23.853 | 51.443 | 13.951 | 36.093 | 33.124 | 59.825 | 48.12  | 28.995  | 24.034 | 15.212 | 35.571 | 11.838 | 28.725 | 21.238 | 36.516 | 12.277 | 34.099 | 27.109 | 54.95  | 64.942 |        |
|        |  | 69.086 | 66.658 | 51.216 | 64.917 | 68.783 | 25.102 | 49.778 | 38.985 | 13.753 | 88.419 | 20.948  | 72.651 | 61.047 | 44.896 | 29.004 | 50.265 | 22.466 | 36.545 | 68.721 | 22.811 | 44.974 | 24.318 | 51.148 | 58.191 |
|        |  | 32.746 | 43.148 | 58.155 | 37.86  | 47.485 | 11.714 | 36.478 | 11.241 | 24.829 | 17.664 | 37.524  | 52.834 | 42.318 | 57.121 | 15.901 | 14.521 | 19.024 | 10.46  | 24.821 | 17.973 | 26.316 | 18.93  | 15.396 | 35.273 |
|        |  | 69.386 | 51.335 | 40.45  | 15.798 | 45.554 | 41.413 | 49.621 | 31.191 | 20.423 | 55.053 | 17.991  | 29.608 | 10.289 | 42.203 | 37.202 | 43.025 | 27.201 | 15.873 | 20.187 | 20     | 61.549 | 37.037 | 44.073 | 86.687 |
|        |  | 81.644 | 44.373 | 50.74  | 23.831 | 13.228 | 18.257 | 15.901 | 41.185 | 32.291 | 49.39  | 38.706  | 18.519 | 31.625 | 16.752 | 33.672 | 25.214 | 43.352 | 15.873 | 22.061 | 26.643 | 57.985 | 18.347 | 38.834 | 49.86  |
|        |  | 76.393 | 59.051 | 18.431 | 80.808 | 14.965 | 21.164 | 55.672 | 13.608 | 14.55  | 23.587 | 18.661  | 13.095 | 33.053 | 39.472 | 56.369 | 19.45  | 39.683 | 31.724 | 36.018 | 23.596 | 59.861 | 23.206 | 27.784 | 26.319 |
|        |  | 52.579 | 12.615 | 50.32  | 50.12  | 79.736 | 19.537 | 42.055 | 30.192 | 31.232 | 17.196 | 80.57   | 29.89  | 26.006 | 33.729 | 71.492 | 34.664 | 9.669  | 21.435 | 30.423 | 34.319 | 27.778 | 27.017 | 31.998 | 46.997 |
|        |  | 68.86  | 55.471 | 55.429 |        | 54.334 | 20.5   | 19.762 | 42.26  | 12.325 | 27.913 | 24.267  | 32.736 | 18.531 | 29.101 | 60.655 | 22.655 | 20.527 | 49.309 | 42.036 | 10.582 | 34.894 | 23.81  | 62.798 | 38.655 |
|        |  | 70.28  | 49.131 | 74.826 |        | 60.685 | 39.601 | 15.675 | 39.214 | 30.765 | 65.744 | 27.665  | 34.392 | 28.87  | 14.908 | 34.7   | 29.221 | 18.285 | 54.522 | 37.413 | 15.069 | 34.392 | 21.076 | 16.54  | 21.513 |
|        |  | 89.393 | 56.716 | 17.376 |        | 23.426 | 19.767 | 40.835 | 18.983 | 69.048 | 28.219 | 28.169  | 25.098 | 37.088 | 31.191 | 30.821 | 40.597 | 32.563 | 15.616 | 19.269 | 27.492 | 15.873 | 23.81  | 36.455 | 40.707 |
|        |  | 61.732 | 18.519 | 46.296 |        | 28.446 | 16.622 | 59.906 | 9.138  | 14.921 | 48.328 | 21.164  | 67.68  | 31.746 | 30.405 | 31.924 | 39.444 | 10.04  | 21.221 | 32.736 | 21.562 | 53.25  | 37.5   | 42.651 | 22.773 |
|        |  | 53.1   | 36.122 | 56.413 |        | 52.293 | 11.905 | 19.665 | 36.821 | 32.109 | 78.801 | 63.612  | 14.965 | 19.459 | 38.231 | 30.063 | 42.423 | 40.772 | 29.076 | 42.118 | 37.383 | 56.878 | 11.063 | 55.02  | 49.711 |
|        |  | 77.319 | 90.252 | 58.543 |        | 62.654 | 22.085 | 22.782 | 17.156 | 12.394 | 80.343 | 15.501  | 72.605 | 41.59  | 26.206 | 44.827 | 38.882 | 24.386 | 18.519 | 14.134 | 38.359 | 39.922 | 14.333 | 43.912 | 11.714 |
|        |  | 58.145 | 78.042 | 49.756 |        |        |        |        |        |        |        |         |        |        |        |        |        |        |        |        |        |        |        |        |        |









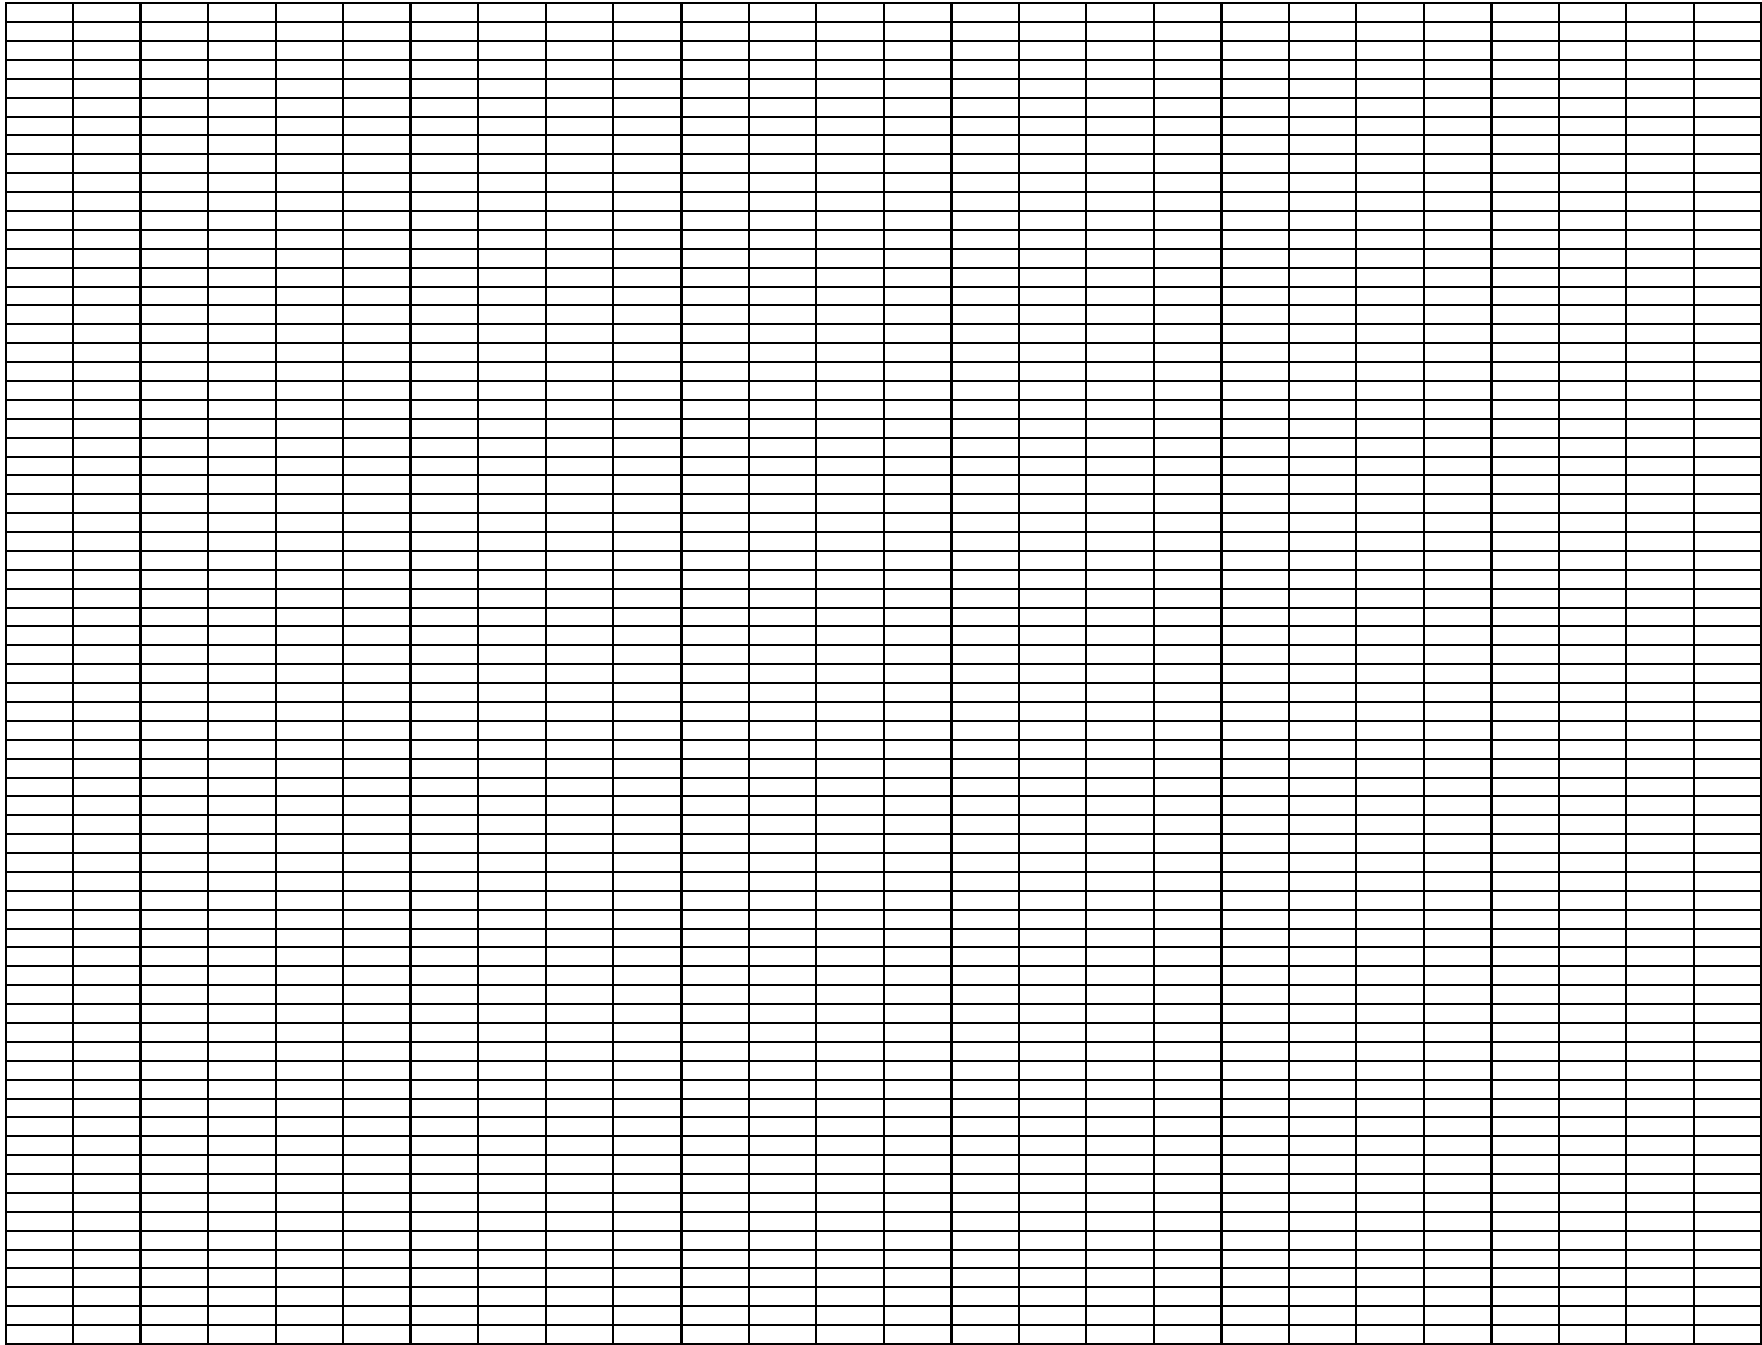

Supplement: elife-72419-fig4-figsupp2-data2.pdf [file elife-72419-fig4-figsupp2-data2.pdf]
