# Supplementary material for: Filopodia powered by class x myosin promote fusion of mammalian myoblasts
Source: PubMed Central journal article supplement (PMC8500716; doi:10.7554/elife.72419), 2021-09-14
Supplement: elife-72419-fig1-figsupp1-data1.pdf [file elife-72419-fig1-figsupp1-data1.pdf]

**Fig S1B&C- Extendi**

| <b>Anterior</b> |                                    |                                 |  |
|-----------------|------------------------------------|---------------------------------|--|
| <b>Exp</b>      | <b>Elongating filopodia (mean)</b> | <b>Retraction fibers (mean)</b> |  |
| 1               | 17                                 | 0                               |  |
| 2               | 19.5                               | 0                               |  |
| 3               | 10                                 | 0                               |  |
| 4               | 12                                 | 0                               |  |

**ng Projections and Retraction Fibers on Undifferentiated Myoblasts**

| <b>Dorsal/Side</b>                 |                                 |  | <b>Poster</b>                      |
|------------------------------------|---------------------------------|--|------------------------------------|
| <b>Elongating filopodia (mean)</b> | <b>Retraction fibers (mean)</b> |  | <b>Elongating filopodia (mean)</b> |
| 5                                  | 6.5                             |  | 0                                  |
| 1.5                                | 4.5                             |  | 0                                  |
| 0.5                                | 1                               |  | 0                                  |
| 1.5                                | 3                               |  | 0.5                                |

|                                 |
|---------------------------------|
|                                 |
| <b>ior</b>                      |
| <b>Retraction fibers (mean)</b> |
| 10.5                            |
| 9                               |
| 5                               |
| 8                               |
