# Supplementary material for: Filopodia powered by class x myosin promote fusion of mammalian myoblasts
Source: PubMed Central journal article supplement (PMC8500716; doi:10.7554/elife.72419), 2021-09-14
Supplement: elife-72419-fig1-figsupp1-data2.pdf [file elife-72419-fig1-figsupp1-data2.pdf]

Fig S1D- Myocyte projection Length

| Fig S1D- Myocyte projection Length |             |          |         |                      |             |          |         |                      |             |          |         |
|------------------------------------|-------------|----------|---------|----------------------|-------------|----------|---------|----------------------|-------------|----------|---------|
| Culture Replicate #1               |             |          |         | Culture Replicate #2 |             |          |         | Culture Replicate #3 |             |          |         |
| Cell#                              | Projection# | Myoblast | Myotube | Cell#                | Projection# | Myoblast | Myotube | Cell#                | Projection# | Myoblast | Myotube |
| 1                                  | 1           | 1.4      | 3.51    | 1                    | 1           | 0.46     | 0.75    | 1                    | 1           | 1        | 9.95    |
|                                    | 2           | 1.1      | 2.99    |                      | 2           | 0.59     | 2.14    |                      | 2           | 3.5      | 2.49    |
|                                    | 3           | 0.81     | 3.15    |                      | 3           | 1.39     | 1.7     |                      | 3           | 4.29     | 4.05    |
|                                    | 4           | 0.81     | 1.58    |                      | 4           | 2.52     | 1       |                      | 4           | 1.2      | 1.73    |
|                                    | 5           | 1.71     | 1.37    |                      | 5           | 2.33     | 2.36    |                      | 5           | 1.15     | 4.85    |
|                                    | 6           | 2.47     | 2.07    |                      | 6           | 1.13     | 2.06    |                      | 6           | 0.84     | 1.46    |
|                                    | 7           | 1.51     | 2.58    |                      | 7           | 0.46     | 1.36    |                      | 7           | 0.63     | 2.84    |
|                                    | 8           | 0.97     | 3.18    |                      | 8           | 0.98     | 1.2     |                      | 8           | 1.34     | 3.44    |
|                                    | 9           | 1.19     | 3.69    |                      | 9           | 0.56     | 2.49    |                      | 9           | 0.69     | 5.69    |
|                                    | 10          | 1.96     | 6.86    |                      | 10          | 0.66     | 1.3     |                      | 10          | 0.97     | 1.38    |
|                                    | 11          | 0.23     | 4.57    |                      | 11          |          | 1.68    |                      | 11          | 0.34     | 5.26    |
|                                    | 12          |          | 4.04    |                      | 12          |          | 1.67    |                      | 12          | 0.77     | 3.35    |
|                                    | 13          |          | 1.36    |                      | 13          |          | 3.02    |                      | 13          | 2.42     | 4.69    |
|                                    | 14          |          | 12.66   |                      | 14          |          | 2.41    |                      | 14          | 0.86     | 0.86    |
|                                    | 15          |          | 2.52    |                      | 15          |          | 6.85    |                      | 15          | 1.22     | 4.14    |
|                                    | 16          |          | 3.92    |                      | 16          |          | 1.32    |                      | 16          | 0.62     | 0.79    |
|                                    | 17          |          | 2.87    |                      | 17          |          | 0.79    |                      | 17          |          | 7.2     |
|                                    | 18          |          | 1.48    |                      | 18          |          | 2.94    |                      | 18          |          | 4.83    |
|                                    | 19          |          | 1.49    |                      | 19          |          | 2.98    |                      | 19          |          | 6.59    |
|                                    | 20          |          | 1.63    |                      | 20          |          | 2.39    |                      | 20          |          | 1.72    |
|                                    | 21          |          | 4.03    |                      | 21          |          | 2.51    |                      | 21          |          | 4.34    |
|                                    | 22          |          | 1.4     |                      | 22          |          | 1.55    |                      | 22          |          | 3.56    |
|                                    | 23          |          | 0.5     |                      | 23          |          | 3.18    |                      | 23          |          | 5.19    |
| 2                                  | 1           | 0.93     | 2.58    | 2                    | 24          |          | 3.82    | 2                    | 24          |          | 2.69    |
|                                    | 2           | 1.24     | 1.02    |                      | 25          |          | 0.88    |                      | 25          |          | 2.45    |
|                                    | 3           | 0.78     | 2.75    |                      | 1           | 1.97     | 2.59    |                      | 26          |          | 0.29    |
|                                    | 4           | 2.02     | 1.14    |                      | 2           | 1.55     | 1.71    |                      | 27          |          | 4.34    |
|                                    | 5           | 1.22     | 1.33    |                      | 3           | 2.56     | 2.02    |                      | 28          |          | 2.46    |
|                                    | 6           | 2.72     | 2.18    |                      | 4           | 2.77     | 1.08    |                      | 29          |          | 6.56    |
|                                    | 7           | 3.59     | 1.19    |                      | 5           | 2.44     | 2.01    |                      | 30          |          | 2.77    |
|                                    | 8           | 0.83     | 1.24    |                      | 6           | 1.99     | 1.49    |                      | 31          |          | 3.24    |
|                                    | 9           | 1.78     | 2.22    |                      | 7           | 3.61     | 4.79    |                      | 32          |          | 5.49    |
|                                    | 10          | 0.75     | 2.28    |                      | 8           | 5.18     | 3.08    |                      | 1           | 1.02     | 2.59    |
|                                    | 11          | 2.16     | 2.24    |                      | 9           | 0.74     | 1.96    |                      | 2           | 0.82     | 3.23    |
|                                    | 12          | 0.5      | 1.37    |                      | 10          | 0.72     | 1.01    |                      | 3           | 1.8      | 3.58    |
|                                    | 13          |          | 2.59    |                      | 11          | 2.33     | 1.33    |                      | 4           | 2.24     | 2.84    |
|                                    | 14          |          | 2.62    |                      | 12          | 5.52     | 1.82    |                      | 5           | 1.64     | 1.18    |
|                                    | 15          |          | 2.93    |                      | 13          | 1.19     | 2.21    |                      | 6           | 2.23     | 2.29    |
|                                    | 16          |          | 2.81    |                      | 14          | 0.6      | 3.29    |                      | 7           | 1.29     | 2.48    |
|                                    | 17          |          | 2.86    |                      | 15          |          | 1.37    |                      | 8           | 1.14     | 2.99    |
|                                    | 18          |          | 3.16    |                      | 16          |          | 5.84    |                      | 9           | 1.18     | 4.63    |
|                                    | 19          |          | 3.99    |                      | 17          |          | 1.03    |                      | 10          | 3.96     | 4.73    |
|                                    | 20          |          | 2.03    |                      | 18          |          | 2.71    |                      | 11          | 2.81     | 0.77    |
|                                    | 21          |          | 4.06    |                      | 19          |          | 5.29    |                      | 12          |          | 2.77    |
|                                    | 22          |          | 3.18    |                      | 20          |          | 3.18    |                      | 13          |          | 2.4     |
|                                    | 23          |          | 0.78    |                      | 21          |          | 2.87    |                      | 14          |          | 2.71    |
|                                    | 24          |          | 2.6     |                      | 22          |          | 3.66    |                      | 15          |          | 2.77    |
|                                    | 25          |          | 2.91    |                      | 23          |          | 2.24    |                      | 16          |          | 2.15    |
|                                    | 26          |          | 4.29    |                      | 24          |          | 2.05    |                      | 17          |          | 6.46    |
| 3                                  | 1           | 1.6      | 2.32    | 3                    | 25          |          | 1.12    | 2                    | 18          |          | 5.4     |
|                                    | 2           | 0.61     | 4.14    |                      | 26          |          | 1.27    |                      | 19          |          | 2.55    |
|                                    | 3           | 0.58     | 3.79    |                      | 27          |          | 2.72    |                      | 20          |          | 3.31    |
|                                    | 4           | 0.83     | 3.04    |                      | 28          |          | 3.09    |                      | 21          |          | 3.38    |
|                                    | 5           | 1.92     | 3.19    |                      | 1           | 1.65     | 0.99    |                      | 22          |          | 4.06    |
|                                    | 6           | 0.98     | 3.57    |                      | 2           | 2.07     | 1.13    |                      | 23          |          | 4.03    |
|                                    | 7           | 1.86     | 3.22    |                      | 3           | 4.93     | 1.38    |                      | 24          |          | 2.29    |
|                                    | 8           | 1.64     | 1.24    |                      | 4           | 2.49     | 1.74    |                      | 25          |          | 1.98    |
|                                    | 9           | 0.42     | 6.62    |                      | 5           | 0.62     | 2.76    |                      | 26          |          | 2.19    |
|                                    | 10          | 1.64     | 4.68    |                      | 6           | 1.33     | 1.31    |                      | 27          |          | 2.4     |
|                                    | 11          | 2.4      | 0.98    |                      | 7           | 1.78     | 0.44    |                      | 28          |          | 2.53    |
|                                    | 12          | 2.29     | 1.94    |                      | 8           | 1.32     | 3.54    |                      | 29          |          | 5.51    |
