# Supplementary material for: Filopodia powered by class x myosin promote fusion of mammalian myoblasts
Source: PubMed Central journal article supplement (PMC8500716; doi:10.7554/elife.72419), 2021-09-14
Supplement: elife-72419-fig2-data1.pdf [file elife-72419-fig2-data1.pdf]

**Fig 2A- *Myo10* Expression in C2C12 Cells**

| <b>Day</b> | <b>1</b> | <b>3</b> | <b>5</b> |
|------------|----------|----------|----------|
| Rep 1      | 1        | 2.18     | 9.42     |
| Rep 2      | 1.21     | 4.53     | 8.91     |
| Rep 3      | 1.5      | 6.46     | 6.13     |
