# Supplementary material for: Filopodia powered by class x myosin promote fusion of mammalian myoblasts
Source: PubMed Central journal article supplement (PMC8500716; doi:10.7554/elife.72419), 2021-09-14
Supplement: elife-72419-fig2-figsupp1-data1.pdf [file elife-72419-fig2-figsupp1-data1.pdf]

| <b>Fig S2A- Myo10 protein in C2C12 cells</b> |          |          |          |
|----------------------------------------------|----------|----------|----------|
| <b>Day</b>                                   | <b>1</b> | <b>3</b> | <b>5</b> |
| Rep 1                                        | 1.832494 | 2.493703 | 7.575567 |
| Rep 2                                        | 0        | 2.90932  | 8.236776 |
| Rep 3                                        | 1.167506 | 3.608312 | 6.479849 |
