# Supplementary material for: Filopodia powered by class x myosin promote fusion of mammalian myoblasts
Source: PubMed Central journal article supplement (PMC8500716; doi:10.7554/elife.72419), 2021-09-14
Supplement: elife-72419-fig2-figsupp1-data3.pdf [file elife-72419-fig2-figsupp1-data3.pdf]

| <b>Fig S2E- Activation of Myo10 promoter in differentiating myoblasts</b> |            |                           |                           |
|---------------------------------------------------------------------------|------------|---------------------------|---------------------------|
| <b>Group</b>                                                              | <b>Exp</b> | <b>Myo10 Content (AU)</b> | <b>RFP/GFP Ratio (AU)</b> |
| Day 1                                                                     | 1          | 0.308105207               | 0.731026873               |
|                                                                           | 2          | 0.632313473               | 0.024183398               |
|                                                                           | 3          | 1.621041331               | 2.158233826               |
|                                                                           | 4          | 1.438539989               | 1.086555903               |
| Day 4                                                                     | 1          | 10.05904455               | 5.412274917               |
|                                                                           | 2          | 15.02952228               | 9.515767858               |
|                                                                           | 3          | 8.760064412               | 13.12439948               |
|                                                                           | 4          | 3.252818035               | 6.635219526               |
