# Supplementary material for: Filopodia powered by class x myosin promote fusion of mammalian myoblasts
Source: PubMed Central journal article supplement (PMC8500716; doi:10.7554/elife.72419), 2021-09-14
Supplement: elife-72419-fig2-figsupp1-data5.pdf [file elife-72419-fig2-figsupp1-data5.pdf]

| <b>Fig 2H- <i>Myo10</i> expression at Day 0</b> |                |                 |
|-------------------------------------------------|----------------|-----------------|
| <b>Group</b>                                    | <b>Control</b> | <b>Myo10 KD</b> |
| Rep 1                                           | 1              | 0.39            |
| Rep 2                                           | 0.9            | 0.24            |
| Rep 3                                           | 1.15           | 0.27            |
