# Supplementary material for: Filopodia powered by class x myosin promote fusion of mammalian myoblasts
Source: PubMed Central journal article supplement (PMC8500716; doi:10.7554/elife.72419), 2021-09-14
Supplement: elife-72419-fig2-figsupp1-data6.pdf [file elife-72419-fig2-figsupp1-data6.pdf]

| <b>Fig S2I- Gene expression at Day 5</b> |                     |                 |                    |                 |
|------------------------------------------|---------------------|-----------------|--------------------|-----------------|
|                                          | <b><i>Myo10</i></b> |                 | <b><i>Myh2</i></b> |                 |
|                                          | <b>Control</b>      | <b>Myo10 KD</b> | <b>Control</b>     | <b>Myo10 KD</b> |
| Rep 1                                    | 1                   | 0.14            | 1                  | 0.76            |
| Rep 2                                    | 0.63                | 0.12            | 0.86               | 0.79            |
| Rep 3                                    | 0.86                | 0.06            | 0.94               | 0.94            |
