# Supplementary material for: Filopodia powered by class x myosin promote fusion of mammalian myoblasts
Source: PubMed Central journal article supplement (PMC8500716; doi:10.7554/elife.72419), 2021-09-14
Supplement: elife-72419-fig3-data1.pdf [file elife-72419-fig3-data1.pdf]

Fig 3E- Cellular Extension Length

| Cell #1     |               |          | Cell #2     |               |          | Cell #3     |               |          |
|-------------|---------------|----------|-------------|---------------|----------|-------------|---------------|----------|
| Extension # | Control shRNA | Myo10 KD | Extension # | Control shRNA | Myo10 KD | Extension # | Control shRNA | Myo10 KD |
| Ext1        | 2.07          | 0.52     | Ext1        | 3.56          | 0.79     | Ext1        | 2.11          | 0.71     |
| Ext2        | 4.14          | 0.48     | Ext2        | 2.69          | 0.55     | Ext2        | 3.86          | 0.88     |
| Ext3        | 4.06          | 0.44     | Ext3        | 0.29          | 0.25     | Ext3        | 4.46          | 0.95     |
| Ext4        | 1.94          | 0.45     | Ext4        | 2.46          | 0.29     | Ext4        | 3.57          | 1.14     |
| Ext5        | 0.98          | 0.29     | Ext5        | 3.18          | 0.42     | Ext5        | 3.22          | 0.8      |
| Ext6        | 0.79          | 0.73     | Ext6        | 2.77          | 0.6      | Ext6        | 3.23          | 0.66     |
| Ext7        | 3.19          | 0.49     | Ext7        | 1.18          | 0.57     | Ext7        | 4.63          | 0.25     |
| Ext8        | 1.2           | 0.44     | Ext8        | 0.77          | 0.91     | Ext8        | 2.77          | 0.27     |
| Ext9        | 2.49          |          | Ext9        | 5.4           | 0.45     | Ext9        | 4.06          | 0.11     |
| Ext10       | 1.36          |          | Ext10       | 1.98          | 1.06     | Ext10       | 5.51          | 0.26     |
| Ext11       | 2.06          |          | Ext11       | 2.45          | 0.46     | Ext11       | 1.68          | 0.25     |
| Ext12       | 1.3           |          | Ext12       | 1.25          |          | Ext12       | 4.38          | 0.5      |
| Ext13       | 1.68          |          | Ext13       | 3.36          |          | Ext13       | 4.29          |          |
| Ext14       | 1.37          |          | Ext14       | 3.15          |          | Ext14       | 4.72          |          |
| Ext15       | 2.72          |          | Ext15       | 3.24          |          | Ext15       | 3.06          |          |
| Ext16       | 1.27          |          | Ext16       | 2.29          |          | Ext16       | 5.8           |          |
| Ext17       | 2.24          |          | Ext17       | 2.77          |          | Ext17       | 2.18          |          |
| Ext18       | 2.58          |          | Ext18       | 2.55          |          | Ext18       | 3.04          |          |
| Ext19       | 0.44          |          | Ext19       | 2.19          |          | Ext19       | 5.29          |          |
| Ext20       | 3.46          |          | Ext20       | 2.81          |          | Ext20       | 3.18          |          |
| Ext21       | 1.74          |          | Ext21       | 1.56          |          | Ext21       | 2.87          |          |
| Ext22       | 2.76          |          | Ext22       | 1.39          |          | Ext22       | 3.66          |          |
| Ext23       | 1.12          |          | Ext23       | 2.07          |          | Ext23       | 3.54          |          |
| Ext24       | 1.31          |          | Ext24       | 4.17          |          | Ext24       | 3.58          |          |
| Ext25       | 2.02          |          | Ext25       | 4.09          |          | Ext25       | 4.73          |          |
| Ext26       | 2.66          |          | Ext26       | 3.89          |          | Ext26       | 2.15          |          |
| Ext27       | 2.05          |          | Ext27       | 1.1           |          | Ext27       | 4.03          |          |
| Ext28       | 2.71          |          | Ext28       | 2.51          |          | Ext28       | 3.4           |          |
| Ext29       | 1.58          |          | Ext29       | 4.68          |          | Ext29       | 5.84          |          |
| Ext30       | 2.01          |          | Ext30       | 1.91          |          | Ext30       | 4.29          |          |
| Ext31       | 2.3           |          | Ext31       | 2.99          |          | Ext31       | 5.26          |          |
| Ext32       | 1.3           |          | Ext32       | 5.49          |          | Ext32       | 4.69          |          |
| Ext33       | 1.66          |          | Ext33       | 2.48          |          | Ext33       | 4.14          |          |
| Ext34       | 2.44          |          | Ext34       | 2.4           |          | Ext34       | 7.2           |          |
| Ext35       | 2.55          |          | Ext35       | 3.31          |          | Ext35       | 6.59          |          |
| Ext36       | 3.61          |          | Ext36       | 2.4           |          | Ext36       | 4.34          |          |
| Ext37       | 4.74          |          | Ext37       | 3.79          |          | Ext37       | 5.19          |          |
| Ext38       | 3.49          |          | Ext38       | 2.59          |          | Ext38       | 2.45          |          |
| Ext39       | 11.38         |          | Ext39       | 2.99          |          | Ext39       | 4.34          |          |
| Ext40       | 9.95          |          | Ext40       | 2.71          |          | Ext40       | 5.16          |          |
| Ext41       | 3.34          |          | Ext41       | 3.38          |          | Ext41       | 1.24          |          |
| Ext42       | 2.32          |          | Ext42       | 2.53          |          | Ext42       | 6.62          |          |
| Ext43       | 1.38          |          | Ext43       | 1.89          |          | Ext43       | 4.68          |          |
| Ext44       | 3.35          |          | Ext44       | 1.73          |          | Ext44       | 3.14          |          |
| Ext45       | 0.86          |          | Ext45       | 2.51          |          | Ext45       | 4.05          |          |
| Ext46       | 0.79          |          | Ext46       | 2.72          |          | Ext46       | 3.51          |          |
| Ext47       | 4.83          |          | Ext47       | 2.19          |          | Ext47       | 3.83          |          |
| Ext48       | 1.72          |          | Ext48       | 3.1           |          | Ext48       | 6.56          |          |
|             |               |          | Ext49       | 1.72          |          | Ext49       | 2.84          |          |
|             |               |          | Ext50       | 2.28          |          | Ext50       | 2.84          |          |
|             |               |          |             |               |          | Ext51       | 6.46          |          |
|             |               |          |             |               |          | Ext52       | 2.29          |          |
|             |               |          |             |               |          | Ext53       | 4.36          |          |
|             |               |          |             |               |          | Ext54       | 3.77          |          |
