# Supplementary material for: Filopodia powered by class x myosin promote fusion of mammalian myoblasts
Source: PubMed Central journal article supplement (PMC8500716; doi:10.7554/elife.72419), 2021-09-14
Supplement: elife-72419-fig3-data2.pdf [file elife-72419-fig3-data2.pdf]

Fig 3F- Myonuclei per differentiated myocyte

| Nuclei per cell |                 |               |          |               |          |               |          |               |          |               |          |               |          |
|-----------------|-----------------|---------------|----------|---------------|----------|---------------|----------|---------------|----------|---------------|----------|---------------|----------|
|                 |                 | 1             |          | 2             |          | 3             |          | 4             |          | 5             |          | 6+            |          |
| Culture#        | Field of View # | Control shRNA | Myo10 KD | Control shRNA | Myo10 KD | Control shRNA | Myo10 KD | Control shRNA | Myo10 KD | Control shRNA | Myo10 KD | Control shRNA | Myo10 KD |
| 1               | 1               | 2             | 4        | 4             | 1        | 5             | 0        | 4             | 0        | 1             | 0        | 7             | 0        |
|                 | 2               | 3             | 4        | 5             | 0        | 2             | 0        | 4             | 0        | 1             | 0        | 4             | 0        |
|                 | 3               | 2             | 6        | 7             | 1        | 5             | 0        | 2             | 0        | 1             | 0        | 7             | 0        |
|                 | 4               | 3             | 7        | 1             | 2        | 4             | 0        | 2             | 0        | 1             | 0        | 8             | 0        |
|                 | 5               | 2             | 7        | 3             | 1        | 2             | 0        | 3             | 0        | 1             | 0        | 8             | 0        |
| 2               | 1               | 2             | 5        | 3             | 1        | 2             | 0        | 3             | 0        | 1             | 0        | 4             | 0        |
|                 | 2               | 2             | 4        | 2             | 1        | 1             | 1        | 1             | 0        | 0             | 0        | 4             | 0        |
|                 | 3               | 2             | 7        | 1             | 2        | 3             | 0        | 1             | 0        | 1             | 0        | 8             | 0        |
|                 | 4               | 2             | 7        | 6             | 0        | 4             | 0        | 4             | 0        | 2             | 0        | 6             | 0        |
|                 | 5               | 4             | 6        | 5             | 1        | 3             | 0        | 3             | 0        | 1             | 0        | 9             | 0        |
| 3               | 1               | 4             | 6        | 2             | 2        | 0             | 0        | 2             | 0        | 2             | 0        | 5             | 0        |
|                 | 2               | 2             | 7        | 2             | 2        | 2             | 0        | 0             | 0        | 0             | 0        | 10            | 0        |
|                 | 3               | 3             | 7        | 3             | 2        | 3             | 0        | 0             | 0        | 1             | 0        | 10            | 0        |
|                 | 4               | 4             | 8        | 4             | 0        | 3             | 0        | 3             | 0        | 1             | 0        | 6             | 0        |
|                 | 5               | 3             | 6        | 4             | 1        | 5             | 3        | 1             | 2        | 1             | 0        | 6             | 0        |
