# Supplementary material for: Filopodia powered by class x myosin promote fusion of mammalian myoblasts
Source: PubMed Central journal article supplement (PMC8500716; doi:10.7554/elife.72419), 2021-09-14
Supplement: elife-72419-fig3-data3.pdf [file elife-72419-fig3-data3.pdf]

| <b>Fig 3H- Differentiated Myocytes with 3+ nuclei (%)</b> |                      |                     |                           |
|-----------------------------------------------------------|----------------------|---------------------|---------------------------|
| <b>Culture#</b>                                           | <b>Control shRNA</b> | <b>Myo10 KD+RFP</b> | <b>Myo10 KD+RFP-Myo10</b> |
| 1                                                         | 0                    | 24.21               | 51.28                     |
| 2                                                         | 0                    | 24.78               | 46.4                      |
| 3                                                         | 0                    | 25.93               | 52.34                     |
| 4                                                         | 0                    | 21.25               |                           |
| 5                                                         | 0                    |                     |                           |
| 6                                                         | 2.7                  |                     |                           |
