# Supplementary material for: Filopodia powered by class x myosin promote fusion of mammalian myoblasts
Source: PubMed Central journal article supplement (PMC8500716; doi:10.7554/elife.72419), 2021-09-14
Supplement: elife-72419-fig3-figsupp1-data1.pdf [file elife-72419-fig3-figsupp1-data1.pdf]

RFP  
RFP-Myo10  
RFP-Myo10 $\Delta$ CBD  
RFP  
RFP-Myo10  
RFP-Myo10 $\Delta$ CBD

260 kDa -  
160 -  
110 -  
80 -  
60 -  
50 -  
40 -  
30 -  
20 -  
15 -

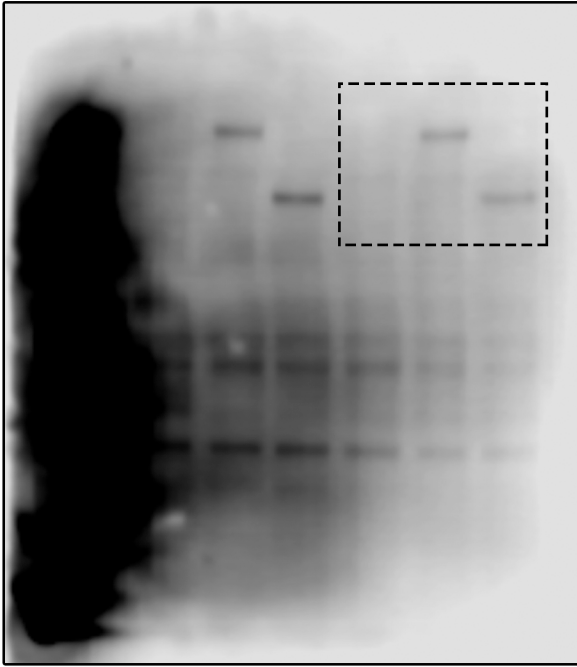

IB: Myo10

RFP-Myo10

RFP-Myo10 $\Delta$ CBD

260 kDa -  
160 -  
110 -  
80 -  
60 -  
50 -  
40 -  
30 -  
20 -  
15 -

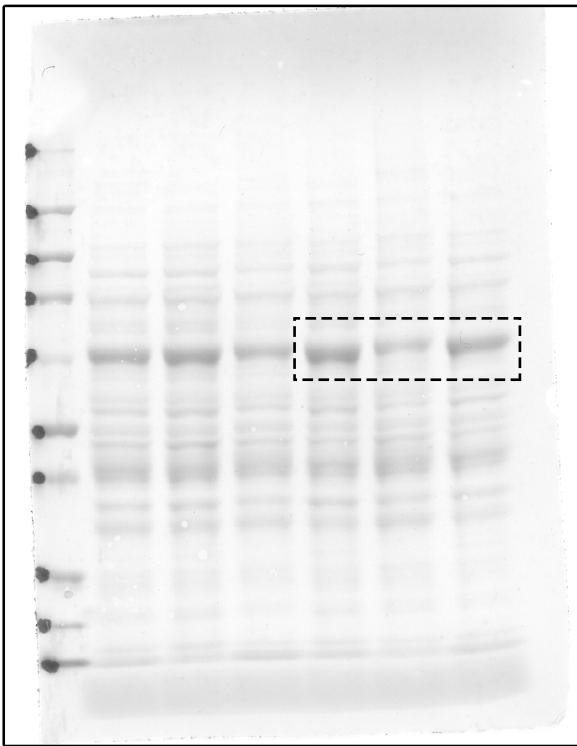

Ponceau Red  
Staining
