# Supplementary material for: Filopodia powered by class x myosin promote fusion of mammalian myoblasts
Source: PubMed Central journal article supplement (PMC8500716; doi:10.7554/elife.72419), 2021-09-14
Supplement: elife-72419-fig3-figsupp1-data3.pdf [file elife-72419-fig3-figsupp1-data3.pdf]

**Fig S3B- Myoblast fusion requires Myo10 cargo binding**

| <b>Control shRNA</b> |              |           |          | <b>Myo10 KD + RFP</b> |              |           |          |
|----------------------|--------------|-----------|----------|-----------------------|--------------|-----------|----------|
| <b>Exp</b>           | <b>Total</b> | <b>3+</b> | <b>%</b> | <b>Exp</b>            | <b>Total</b> | <b>3+</b> | <b>%</b> |
| 1                    | 187          | 58        | 31.01604 | 1                     | 100          | 1         | 1        |
| 2                    | 233          | 51        | 21.88841 | 2                     | 135          | 0         | 0        |
| 3                    | 79           | 19        | 24.05063 | 3                     | 73           | 0         | 0        |
| 4                    | 173          | 42        | 24.27746 | 4                     | 149          | 0         | 0        |
| 5                    | 271          | 84        | 30.99631 | 5                     | 41           | 0         | 0        |
| 6                    | 267          | 51        | 19.10112 | 6                     | 75           | 0         | 0        |

; domains

| Myo10 KD + RFP-Myo10 $\Delta$ CBD |       |    |   |
|-----------------------------------|-------|----|---|
| Exp                               | Total | 3+ | % |
| 1                                 | 35    | 0  | 0 |
| 2                                 | 69    | 0  | 0 |
| 3                                 | 44    | 0  | 0 |
| 4                                 | 109   | 0  | 0 |
| 5                                 | 60    | 0  | 0 |
| 6                                 | 79    | 0  | 0 |
