# Supplementary material for: Filopodia powered by class x myosin promote fusion of mammalian myoblasts
Source: PubMed Central journal article supplement (PMC8500716; doi:10.7554/elife.72419), 2021-09-14
Supplement: elife-72419-fig3-figsupp2-data1.pdf [file elife-72419-fig3-figsupp2-data1.pdf]

| <b>Fig S4C- Mixed Fusion Assay</b> |                              |                 |            |
|------------------------------------|------------------------------|-----------------|------------|
|                                    | <b>% of Labeled Myotubes</b> |                 |            |
| <b>Experiment</b>                  | <b>Green Only</b>            | <b>Red Only</b> | <b>G+R</b> |
| Exp 1                              | 80                           | 20              | 0          |
|                                    | 100                          | 0               | 0          |
|                                    | 100                          | 0               | 0          |
|                                    | 100                          | 0               | 0          |
| Exp 2                              | 85.71428571                  | 0               | 14.28571   |
|                                    | 100                          | 0               | 0          |
|                                    | 100                          | 0               | 0          |
|                                    | 100                          | 0               | 0          |
| Exp 3                              | 100                          | 0               | 0          |
|                                    | 100                          | 0               | 0          |
|                                    | 100                          | 0               | 0          |
|                                    | 100                          | 0               | 0          |
| Exp 4                              | 85.71428571                  | 14.28571        | 0          |
|                                    | 100                          | 0               | 0          |
|                                    | 100                          | 0               | 0          |
|                                    | 100                          | 0               | 0          |
| Exp 5                              | 100                          | 0               | 0          |
|                                    | 90                           | 10              | 0          |
|                                    | 100                          | 0               | 0          |
|                                    | 100                          | 0               | 0          |
