# Supplementary material for: Filopodia powered by class x myosin promote fusion of mammalian myoblasts
Source: PubMed Central journal article supplement (PMC8500716; doi:10.7554/elife.72419), 2021-09-14
Supplement: elife-72419-fig4-data1.pdf [file elife-72419-fig4-data1.pdf]

**Fig 4G-H- Muscle Fiber Diameters at Day 8 following CTX**

| Muscle Sample #1 |             | Muscle Sample #2 |             | Muscle Sample #3 |             | Muscle Sample #4 |             | Muscle Sample #5 |             | Muscle Sample #6 |             |
|------------------|-------------|------------------|-------------|------------------|-------------|------------------|-------------|------------------|-------------|------------------|-------------|
| Pax7-WT          | Pax7-M10cKO | Pax7-WT          | Pax7-M10cKO | Pax7-WT          | Pax7-M10cKO | Pax7-WT          | Pax7-M10cKO | Pax7-WT          | Pax7-M10cKO | Pax7-WT          | Pax7-M10cKO |
| 22.647           | 15.796      | 22.187           | 20.522      | 14.88            | 14.435      | 16.57            | 20.879      | 21.854           | 24.466      | 39.237           | 26.256      |
| 17.098           | 28.981      | 24.282           | 14.198      | 18.049           | 14.128      | 17.241           | 24.728      | 23.062           | 11.267      | 20.225           | 32.711      |
| 24.615           | 16.484      | 7.764            | 17.241      | 29.881           | 11.131      | 14.51            | 20.105      | 20.251           | 22.929      | 13.426           | 12.161      |
| 33.465           | 22.026      | 21.59            | 9.255       | 19.194           | 17.241      | 19.029           | 15.693      | 25.896           | 10.423      | 16.343           | 25.862      |
| 20.869           | 24.095      | 18.53            | 19.538      | 35.878           | 26.66       | 19.403           | 22.759      | 16.417           | 11.338      | 29.038           | 21.445      |
| 22.414           | 14.531      | 11.8             | 15.871      | 16.17            | 14.368      | 10.92            | 18.818      | 25.803           | 19.549      | 22.508           | 9.744       |
| 29.064           | 17.816      | 22.32            | 7.093       | 15.998           | 20.69       | 19.088           | 10.972      | 21.264           | 27.485      | 32.471           | 20.497      |
| 18.88            | 10.312      | 24.259           | 11.247      | 15.246           | 13.286      | 19.889           | 13.793      | 16.092           | 22.057      | 12.045           | 15.249      |
| 16.132           | 20.111      | 27.9             | 8.689       | 14.913           | 25.287      | 12.596           | 10.547      | 23.597           | 16.149      | 16.38            | 25.201      |
| 19.433           | 19.137      | 18.844           | 13.969      | 12.93            | 12.357      | 20.056           | 24.127      | 35.877           | 35          | 10.703           | 53.97       |
| 30.501           | 13.444      | 32.704           | 16.939      | 9.647            | 17.397      | 17.241           | 15.175      | 15.916           | 23.115      | 35.35            | 39.796      |
| 31.256           | 5.747       | 23.436           | 11.494      | 18.966           | 32.107      | 19.214           | 15.508      | 22.91            | 18.921      | 24.886           | 12.579      |
| 20.408           | 16.052      | 30.779           | 14.762      | 14.08            | 7.974       | 7.047            | 7.275       | 21.241           | 29.182      | 14.863           | 13.137      |
| 18.621           | 5.564       | 11.254           | 12.617      | 15.954           | 23.647      | 14.123           | 17.693      | 23.107           | 37.086      | 22.886           | 16.253      |
| 33.809           | 14.281      | 25.494           | 10.964      | 24.789           | 14.571      | 24.245           | 7.93        | 31.631           | 14.043      | 26.653           | 15.618      |
| 28.326           | 7.278       | 9.218            | 15.359      | 24.713           | 24.077      | 17.699           | 6.919       | 21.591           | 17.974      | 28.559           | 29.849      |
| 20.232           | 8.302       | 21.796           | 16.306      | 15.517           | 14.223      | 9.539            | 10.8        | 12.606           | 22.641      | 40.625           | 24.641      |
| 24.713           | 13.813      | 18.722           | 19.217      | 10.66            | 12.143      | 15.801           | 7.454       | 15.131           | 29.064      | 13.368           | 18.004      |
| 24.491           | 8.046       | 26.112           | 12.345      | 22.814           | 17.02       | 16.992           | 25.035      | 27.4             | 11.712      | 21.639           | 13.073      |
| 26.195           | 17.481      | 23.769           | 10.54       | 20.946           | 13.522      | 13.112           | 36.527      | 19.798           | 28.16       | 18.342           | 10.345      |
| 25.731           | 30.038      | 13.815           | 14.022      | 26.726           | 12.818      | 17.002           | 34.483      | 22.593           | 20.873      | 13.636           | 39.08       |
| 17.33            | 17.635      | 41.17            | 11.494      | 14.796           | 26.635      | 18.868           | 11.729      | 49.463           | 16.637      | 26.239           | 7.592       |
| 14.936           | 11.555      | 15.362           | 18.391      | 12.533           | 12.357      | 10.612           | 20.58       | 32.563           | 22.989      | 16.381           | 10.118      |
| 38.442           | 24.169      | 30.382           | 17.252      | 14.121           | 13.793      | 14.72            | 20.184      | 17.766           | 13.793      | 18.802           | 15.714      |
| 28.288           | 15.695      | 25.515           | 13.311      | 22.763           | 25.212      | 10.566           | 41.193      | 20.87            | 22.063      | 24.222           | 15.884      |
| 27.042           | 6.897       | 20.69            | 10.388      | 8.361            | 12.069      | 23.706           | 8.174       | 16.258           | 21.39       | 18.966           | 8.046       |
| 24.83            | 10.345      | 26.124           | 14.04       | 29.637           | 6.579       | 22.004           | 27.725      | 18.391           | 37.945      | 18.353           | 11.139      |
| 24.408           | 7.159       | 24.424           | 22.247      | 10.228           | 21.118      | 17.938           | 43.724      | 21.174           | 25.141      | 20.131           | 10.345      |
| 26.558           | 10.92       | 21.465           | 24.819      | 12.943           | 13.681      | 17.241           | 17.757      | 16.956           | 13.703      | 20.034           | 12.553      |
| 19.937           | 23.071      | 17.816           | 18.2        | 9.412            | 12.36       | 10.345           | 26.93       | 16.996           | 26.961      | 25.865           | 24.938      |
| 32.253           | 12.199      | 25.285           | 10.92       | 15.855           | 18.096      | 23.579           | 16.665      | 21.244           | 34.461      | 14.486           | 21.291      |
| 34.924           | 15.443      | 19.279           | 9.615       | 21.245           | 17.459      | 18.501           | 23.609      | 29.562           | 23.634      | 20.47            | 9.145       |
| 27.877           | 22.929      | 20.383           | 21.633      | 14.486           | 12.508      | 23.659           | 17.613      | 31.382           | 17.389      | 24.888           | 11.899      |
| 22.187           | 17.391      | 29.311           | 8.407       | 15.607           | 15.476      | 19.971           | 17.559      | 34.088           | 27.561      | 26.961           | 18.428      |
| 20.037           | 24.397      | 15.995           | 8.331       | 25.213           | 15.273      | 26.221           | 22.018      | 30.885           | 21.649      | 22.7             | 20.119      |
| 38.839           | 14.318      | 35.863           | 11.588      | 16.779           | 27.924      | 16.037           | 5.43        | 29.984           | 21.251      | 27.315           | 17.052      |
| 30.919           | 20.647      | 40.399           | 10.926      | 26.643           | 16.967      | 12.069           | 9.77        | 19.297           | 13.587      | 24.749           | 27.109      |
| 31.618           | 20.843      | 42.068           | 5.805       | 28.156           | 5.747       | 18.424           | 10.566      | 24.109           | 12.286      | 19.684           | 32.579      |
| 23.192           | 21.061      | 45.454           | 8.882       | 17.012           | 18.825      | 13.825           | 18.809      | 18.391           | 19.596      | 25.284           | 11.398      |
| 26.171           | 15.869      | 35.632           | 7.113       | 19.865           | 20.472      | 11.572           | 22.566      | 21.142           | 20.94       | 30.308           | 12.077      |
| 31.527           | 24.115      | 20.549           | 21.682      | 21.106           | 12.271      | 16.398           | 29.46       | 20.566           | 20.156      | 35.044           | 17.241      |
| 32.759           | 17.153      | 22.001           | 27.314      | 30.574           | 8.061       | 23.532           | 21.046      | 18.392           | 13.549      | 27.701           | 20.415      |
| 34.373           | 12.179      | 17.272           | 19.037      | 24.423           | 27.83       | 24.686           | 12.062      | 33.924           | 15.001      | 62.745           | 16.018      |
| 19.962           | 12.757      | 17.459           | 31.473      | 11.689           | 25.745      | 14.402           | 17.189      | 23.551           | 23.308      | 32.385           | 12.151      |
| 27.558           | 11.956      | 24.358           | 11.942      | 14.716           | 7.045       | 13.502           | 22.426      | 33.591           | 14.363      | 17.596           | 12.598      |
| 28.029           | 24.585      | 21.489           | 14.626      | 24.171           | 25.287      | 8.486            | 14.368      | 26.503           | 14.754      | 37.964           | 32.773      |
| 34.087           | 17.93       | 18.779           | 17.188      | 14.021           | 22.069      | 15.655           | 12.899      | 21.313           | 12.952      | 25.439           | 14.251      |
| 35.713           | 37.996      | 30.212           | 12.399      | 27.894           | 18.465      | 17.266           | 22.34       | 27.731           | 12.644      | 24.887           | 19.445      |
| 17.181           | 21.057      | 24.61            | 19.807      | 30.466           | 22.365      | 15.36            | 18.124      | 26.277           | 10.694      | 20.929           | 23.326      |
| 17.773           | 26.192      | 25.252           | 9.861       | 30.184           | 13.107      | 21.442           | 18.549      | 29.467           | 14.794      | 14.895           | 22.88       |
| 28.736           | 15.643      | 15.941           | 20.849      | 33.696           | 23.703      | 12.412           | 14.795      | 25.832           | 15.63       | 14.91            | 22.601      |
| 23.882           | 16.015      | 14.862           | 15.764      | 15.461           | 9.261       | 23.624           | 14.84       | 17.816           |             | 16.046           | 26.225      |
| 24.843           | 24.972      | 28.125           | 9.607       | 13.974           | 13.162      | 22.932           | 8.888       | 17.268           |             | 13.102           | 16.289      |
| 19.54            | 15.938      | 21.706           | 24.635      | 26.78            | 31.107      | 12.882           | 29.321      | 21.072           |             | 14.446           | 12.717      |
| 13.998           | 17.816      | 23.624           | 18.082      | 34.088           | 12.021      | 16.011           | 12.162      | 17.207           |             | 16.997           | 28.072      |
| 16.299           | 17.805      | 33.733           | 17.479      | 29.462           | 17.009      | 10.382           | 20.097      | 39.314           |             | 23.437           | 19.514      |
| 19.807           | 26.369      | 27.76            | 9.738       | 22.332           | 7.457       | 16.076           | 14.754      | 22.426           |             | 18.649           | 16.066      |
| 21.122           | 9.484       | 17.427           | 10.345      | 24.597           | 15.176      | 24.23            | 14.712      | 37.991           |             | 14.685           | 13.437      |
| 35.697           | 8.913       | 29.169           | 9.102       | 17.504           | 14.453      | 20.999           | 14.891      | 35.131           |             | 22.438           | 26.359      |
| 16.168           | 15.841      | 15.977           | 9.483       | 29.251           | 12.55       | 20.122           | 7.464       | 40.929           |             | 28.136           | 32.12       |
| 16.557           | 14.432      | 18.362           | 7.315       | 25.892           | 14.917      | 6.017            | 9.639       | 26.432           |             | 32.511           | 20.336      |
| 27.74            | 22.807      | 14.008           | 13.813      | 12.175           | 11.614      | 14.869           | 24.183      | 33.165           |             | 15.602           | 19.652      |
| 29.634           | 32.558      | 19.506           | 12.829      | 16.453           | 10.26       | 22.594           | 20.903      | 29.207           |             | 24.414           | 13.494      |
| 36.646           | 12.431      | 26.176           | 5.849       | 15.927           | 20.469      | 10.851           | 12.574      | 43.996           |             | 10.391           | 27.533      |
| 27.781           | 30.002      | 18.694           | 13.55       | 15.975           | 16.109      | 23.265           | 18.821      | 29.114           |             | 17.147           | 17.16       |
| 36.767           | 32.359      | 21.244           | 11.961      | 21.839           | 16.541      | 6.322            | 18.545      | 29.58            |             | 12.726           | 16.204      |
| 23.1             | 36.84       | 23.45            | 16.815      | 26.04            | 20.981      | 20.9             | 15.428      | 26.989           |             | 15.596           | 12.144      |
| 12.445           | 10.712      | 31.428           | 14.222      | 18.689           | 13.229      | 13.487           | 7.288       | 23.488           |             | 14.464           | 25.896      |
| 16.757           | 19.105      | 21.344           | 9.737       | 28.781           | 11.053      | 12.506           | 10.345      | 23.532           |             | 14.057           | 17.877      |
| 37.476           | 33.04       | 21.502           | 6.322       | 35.194           | 9.721       | 24.253           | 13.793      | 18.576           |             | 24.636           | 14.988      |

|        |        |        |        |        |        |        |        |        |  |        |        |
|--------|--------|--------|--------|--------|--------|--------|--------|--------|--|--------|--------|
| 24.185 | 23.226 | 17.188 | 8.94   | 15.399 | 11.655 | 13.575 | 12.379 | 32.941 |  | 22.626 | 12.193 |
| 18.573 | 20.115 | 20.286 | 29.361 | 24.903 | 9.955  | 22.414 | 21.538 | 12.644 |  | 11.067 | 18.175 |
| 20.456 | 15.517 | 18.73  | 18.029 | 12.606 | 18.922 | 29.773 | 20.274 | 33.077 |  | 17.375 | 27.011 |
| 17.33  | 20.856 | 25.107 | 10.657 | 32.269 | 12.539 | 19.903 | 14.123 | 23.215 |  | 13.793 | 21.052 |
| 19.477 | 7.964  | 22.593 | 13.793 | 23.819 | 23.29  | 15.447 | 24.66  | 32.642 |  | 19.776 | 11.836 |
| 35.4   | 16.092 | 10.675 | 10.738 | 22.55  | 6.873  | 24.677 | 18.546 | 28.177 |  | 17.799 | 14.398 |
| 20.997 | 12.644 | 13.015 | 12.665 | 30.264 | 10.215 | 18.687 | 16.19  | 26.837 |  | 24.261 | 17.241 |
| 25.65  | 17.745 | 16.401 | 26.688 | 34.059 | 18.051 | 25.855 | 9.579  | 31.496 |  | 15.803 | 25.287 |
| 32.857 | 10.061 | 22.643 | 20.69  | 19.158 | 15.491 | 31.235 | 19.234 | 30.46  |  | 36.672 | 16.065 |
| 17.947 | 13.757 | 29.81  | 13.387 | 29.646 | 18.169 | 26.687 | 9.756  | 20.018 |  | 24.739 | 14.469 |
| 23.927 | 15.982 | 19.773 | 16.638 | 17.535 | 14.377 | 19.752 | 14.363 | 21.429 |  | 16.272 | 7.162  |
| 11.222 | 12.774 | 24.872 | 24.713 | 20.388 | 9.407  | 24.954 | 26.313 | 26.784 |  | 9.47   | 22.066 |
| 24.153 | 13.222 | 47.091 | 13.274 | 30.407 | 16.796 | 21.907 | 24.985 | 27.783 |  | 31.121 | 14.273 |
| 13.958 | 13.259 | 30.479 | 25.372 | 27.739 | 9.956  | 22.847 | 9.608  | 18.299 |  | 28.579 | 16.199 |
| 20.21  | 14.106 | 33.908 | 20.699 | 25.849 | 20.69  | 25.456 | 14.736 | 28.178 |  | 10.338 | 28.287 |
| 27.216 | 16.364 | 29.252 | 11.661 | 33.498 | 12.286 | 21.495 | 18.415 | 29.52  |  | 12.644 | 19.555 |
| 20.367 | 26.754 | 35.702 | 15.41  | 18.805 | 17.295 | 20.084 | 18.863 | 25.862 |  | 17.205 | 10.566 |
| 19.772 | 9.424  | 48.104 | 3.959  | 24.522 | 21.119 | 13.793 | 11.772 | 29.665 |  | 13.793 | 18.966 |
| 22.249 | 10.416 | 25.701 | 13.354 | 14.178 | 13.869 | 15.754 | 11.251 | 30.628 |  | 18.805 | 34.949 |
| 22.692 | 11.201 | 18.299 | 10.217 | 31.558 | 16.907 | 22.078 | 10.685 | 26.437 |  | 17.621 | 10.11  |
| 25.095 | 13.551 | 25.53  | 25.268 | 28.501 | 16.81  | 11.794 | 8.786  | 24.624 |  | 16.647 | 16.897 |
| 9.775  | 39.416 | 30.4   | 15.035 | 33.656 | 9.775  | 18.117 | 12.335 | 24.797 |  | 26.343 | 47.323 |
| 31.864 | 11.016 | 18.958 | 15.389 | 32.521 | 14.061 | 23.3   | 19.222 | 28.817 |  | 19.789 | 20.929 |
| 20.502 | 8.621  | 18.391 | 26.821 | 41.007 | 15.236 | 16.766 | 14.324 | 31.129 |  | 20.719 | 18.958 |
| 19.01  | 9.006  | 28.702 | 10.507 | 37.433 | 8.449  | 24.981 | 42.015 | 31.686 |  | 23.702 | 18.976 |
| 20.362 | 22.989 | 22.115 | 12.649 | 25.604 | 11.555 | 16.113 | 20.627 | 27.011 |  | 22.692 | 18.966 |
| 11.867 | 23.453 | 31.913 | 13.112 | 35.36  | 14.622 | 23.195 | 10.091 | 19.363 |  | 22.582 | 13.377 |
| 15.607 | 7.59   | 37.298 | 24.518 | 21.408 | 8.875  | 32.774 | 6.572  | 30.922 |  | 39.436 | 10.855 |
| 15.717 | 15.041 | 35.309 | 14.305 | 29.765 | 12.598 | 28.06  | 16.763 | 27.727 |  | 24.138 | 14.424 |
| 17.727 | 22.895 | 40.192 | 18.416 | 26.787 | 20.479 | 25.324 | 9.831  | 27.464 |  | 12.193 | 28.058 |
| 24.303 | 24.938 | 25.537 | 20.845 | 13.248 | 22.051 | 24.801 | 13.342 | 19.419 |  | 23.017 | 13.484 |
| 10.067 | 16.11  | 26.112 | 11.396 | 28.173 | 29.428 | 26.678 | 33.757 | 23.721 |  | 31.237 | 17.972 |
| 18.184 | 11.198 | 17.284 | 9.961  | 25.564 | 23.526 | 25.438 | 23.563 | 25.503 |  | 34.689 | 14.977 |
| 8.654  | 18.772 | 24.068 | 23.475 | 35.632 | 10.674 | 24.613 | 10.069 | 32.655 |  | 13.767 | 15.329 |
| 15.999 | 20.777 | 29.121 | 16.451 | 16.331 | 31.546 | 19.511 | 3.113  | 24.887 |  | 15.347 | 31.767 |
| 11.502 | 19.187 | 21.138 | 13.609 | 20.315 | 9.848  | 33.082 | 18.425 | 26.4   |  | 23.434 | 19.22  |
| 21.735 | 13.94  | 25.52  | 12.597 | 33.73  | 13.669 | 16.422 | 21.645 | 23.954 |  | 19.599 | 24.867 |
| 31.043 | 19.613 | 43.553 | 13.955 | 30.372 | 11.016 | 13.863 | 9.414  | 26.922 |  | 21.353 | 13.817 |
| 16.429 | 6.692  | 21.865 | 19.895 | 31.321 | 6.143  | 29.634 | 14.949 | 19.094 |  | 21.062 | 19.492 |
| 25.168 | 4.989  | 28.992 | 26.775 | 23.864 | 33.504 | 21.751 | 25.88  | 22.989 |  | 23.988 | 18.371 |
| 12.585 | 14.053 | 24.283 | 13.994 | 40.066 | 20.793 | 24.383 | 19.763 | 16.859 |  | 13.588 | 23.917 |
| 22.199 | 14.221 | 29.658 | 25.298 | 29.849 | 34.866 | 29.64  | 9.347  | 33.094 |  | 23.563 | 13.505 |
| 20.771 | 25.291 | 23.985 | 8.641  | 26.917 | 19.601 | 26.484 | 14.368 | 22.222 |  | 28.377 | 19.064 |
| 18.264 | 16.322 | 28.076 | 14.67  | 33.164 | 12.965 | 25.192 | 24.715 | 30.177 |  | 24.245 | 23.88  |
| 30.835 | 9.43   | 25.477 | 14.886 | 28.327 | 28.738 | 23.561 | 16.263 | 27.828 |  | 19.581 | 31.604 |
| 25.295 | 20.041 | 41.04  | 17.131 | 32.648 | 23.256 | 25.196 | 13.208 |        |  | 34.426 | 17.826 |
| 25.502 | 17.692 | 11.907 | 13.439 | 19.458 | 11.712 | 18.615 | 15.603 |        |  | 25.182 | 12.001 |
| 15.818 | 10.615 | 14.219 | 14.03  | 23.914 | 11.923 | 16.834 | 24.038 |        |  | 31.216 | 29.008 |
| 15.944 | 7.994  | 18.895 | 13.344 | 36.186 | 28.284 | 32.029 | 10.429 |        |  | 29.439 | 15.527 |
| 26.435 | 15.928 | 12.717 | 17.645 | 24.138 | 18.249 | 28.735 | 12.276 |        |  | 29.431 | 17.326 |
| 12.931 | 19.976 | 25.993 | 19.184 | 30.4   | 19.741 | 35.057 | 10.92  |        |  | 18.627 | 16.361 |
| 26.894 | 9.537  | 29.729 | 22.119 | 23.371 | 19.321 | 25.114 | 15.607 |        |  | 23.641 | 14.518 |
| 13.3   | 16.882 | 30.534 | 26.98  | 29.666 | 14.097 | 26.544 | 19.936 |        |  | 33.726 | 23.576 |
| 28.161 | 11.632 | 15.2   | 14.368 | 26.927 | 15.598 | 46.731 | 22.187 |        |  | 23.58  | 25.316 |
| 13.225 | 14.731 | 26.828 | 23.083 | 28.975 | 14.111 | 18.164 | 13.753 |        |  | 30.242 | 18.391 |
| 32.445 | 18.007 | 17.625 | 19.962 | 26.814 | 28.999 | 37.928 | 31.124 |        |  | 25.489 | 27.722 |
| 22.196 | 22.37  | 34.076 | 13.759 | 25.111 | 33.344 | 29.271 | 26.416 |        |  | 19.003 | 12.549 |
| 14.78  | 9.753  | 28.257 | 6.176  | 25.576 |        | 30.351 | 20.166 |        |  | 15.056 | 17.91  |
| 24.414 | 16.796 | 23.541 | 16.031 | 17.842 |        | 16.168 | 10.008 |        |  | 27.013 | 30.625 |
| 20.623 | 15.277 | 20.095 | 8.356  | 39.078 |        | 29.452 | 9.625  |        |  | 27.546 | 12.316 |
| 29.639 | 11.152 | 25.984 | 32.618 | 28.183 |        | 32.33  | 14.911 |        |  | 23.93  | 24.424 |
| 32.978 | 19.882 | 14.096 | 13.484 | 23.274 |        | 24.977 | 17.489 |        |  | 21.569 | 17.241 |
| 18.914 | 16.008 | 34.67  | 26.745 | 31.095 |        | 28.242 | 22.989 |        |  | 28.198 | 14.201 |
| 25.093 | 18.966 | 19.368 | 26.76  | 39.74  |        | 18.208 | 8.232  |        |  | 28.909 | 17.661 |
| 20.171 | 13.658 | 32.575 | 10.751 | 41.438 |        | 36.329 | 14.059 |        |  | 17.918 | 17.792 |
| 19.574 | 26.834 | 14.188 | 22.798 | 21.741 |        | 30.066 | 12.857 |        |  | 11.058 | 17.137 |
| 18.052 | 10.287 | 32.734 | 14.029 | 27.428 |        | 41.454 | 17.35  |        |  | 10.662 |        |
| 22.481 | 8.046  | 55.86  | 24.235 | 23.153 |        | 31.201 | 18.874 |        |  | 29.658 |        |
| 15.851 | 30.152 | 16.77  | 15.23  | 24.138 |        | 27.433 | 14.643 |        |  | 19.1   |        |
| 21.689 | 7.74   | 49.056 | 16.903 | 31.902 |        | 10.163 | 23.167 |        |  | 20.692 |        |
| 13.927 | 21.819 | 21.577 | 20.096 | 22.096 |        | 30.791 | 13.776 |        |  | 26.335 |        |
| 23.52  | 17.229 | 22.913 | 21.514 | 21.698 |        | 32.436 | 22.815 |        |  | 28.778 |        |
| 15.186 | 22.062 | 14.047 | 13.851 | 38.012 |        | 28.887 | 10.965 |        |  | 16.518 |        |
| 23.12  | 21.445 | 17.107 | 11.942 | 31.348 |        | 20.842 | 28.947 |        |  | 26.897 |        |

|        |        |        |        |        |        |  |  |        |
|--------|--------|--------|--------|--------|--------|--|--|--------|
| 27.007 | 16.667 | 26.308 | 12.803 | 27.493 | 24.494 |  |  | 10.429 |
| 18.183 | 11.459 | 39.33  | 17.082 | 14.184 | 23.888 |  |  | 21.144 |
| 21.511 | 14.654 | 20.111 | 23.006 | 34.445 | 24.617 |  |  | 20.835 |
| 15.281 | 10.92  | 19.411 | 18.907 | 33.128 | 29.434 |  |  | 35.057 |
| 14.958 | 13.339 | 23.356 | 10.319 | 32.092 | 31.714 |  |  | 29.124 |
| 15.062 | 14.716 | 22.818 | 16.523 | 37.642 | 19.399 |  |  | 39.571 |
| 33.039 | 10.314 | 13.336 | 13.094 |        | 34.159 |  |  | 23.025 |
| 22.598 | 7.96   | 32.595 | 9.241  |        | 20.175 |  |  | 24.023 |
| 15.962 | 13.543 | 22.41  | 9.319  |        | 12.709 |  |  | 30.164 |
| 15.878 | 6.451  | 24.501 | 13.467 |        | 22.328 |  |  | 33.457 |
| 18.275 | 12.506 | 14.487 | 17.705 |        | 22.263 |  |  | 25.983 |
| 19.914 | 10.786 | 21.147 | 13.853 |        | 20.69  |  |  | 22.414 |
| 22.365 | 16.459 | 22.283 | 18.397 |        | 29.553 |  |  | 28.642 |
| 21.264 | 12.032 | 21.094 | 9.221  |        | 23.703 |  |  | 31.157 |
| 24.924 | 18.888 | 32.184 | 16.591 |        | 13.151 |  |  | 19.149 |
| 31.26  | 8.916  | 32.424 | 24.612 |        | 18.732 |  |  | 22.723 |
| 9.988  | 20.69  | 53.453 | 15.889 |        | 43.964 |  |  |        |
| 10.369 | 16.468 | 29.624 | 25.633 |        | 21.12  |  |  |        |
| 12.983 | 19.403 | 22.448 | 15.517 |        | 18.952 |  |  |        |
| 21.484 | 10.202 | 40.675 | 15.798 |        | 26.625 |  |  |        |
| 18.337 | 20.692 | 26.073 | 9.729  |        | 19.628 |  |  |        |
| 19.274 | 16.811 | 31.554 | 24.245 |        | 35.665 |  |  |        |
| 9.956  | 10.826 | 18.711 | 28.05  |        | 32.786 |  |  |        |
| 16.971 | 12.421 | 23.563 | 20.986 |        | 46.174 |  |  |        |
| 8.903  | 7.381  | 28.069 | 21.474 |        | 29.67  |  |  |        |
| 13.579 | 12.598 | 47.218 | 6.897  |        | 43.179 |  |  |        |
| 30.98  | 17.732 | 27.611 | 9.036  |        | 32.669 |  |  |        |
| 17.467 | 22.989 | 48.799 | 17.875 |        | 26.775 |  |  |        |
| 31.565 | 12.463 | 41.528 | 3.998  |        | 18.372 |  |  |        |
| 11.494 | 18.777 | 26.311 | 24.718 |        | 28.317 |  |  |        |
| 8.7    | 16.25  | 24.803 | 14.312 |        |        |  |  |        |
| 16.576 | 9.508  | 28.187 | 14.367 |        |        |  |  |        |
| 34.755 | 12.03  | 37.334 | 18.086 |        |        |  |  |        |
| 30.811 | 6.184  | 30.141 | 13.503 |        |        |  |  |        |
| 29.278 | 14.05  | 24.923 | 17.362 |        |        |  |  |        |
| 28.54  | 8.913  | 31.68  | 26.645 |        |        |  |  |        |
| 27.005 | 14.022 | 24.106 | 12.306 |        |        |  |  |        |
| 41.161 | 8.087  | 27.834 | 8.407  |        |        |  |  |        |
| 28.791 | 11.436 | 27.202 | 15.046 |        |        |  |  |        |
| 16.667 | 24.123 | 22.835 | 13.343 |        |        |  |  |        |
| 25.543 | 14.281 | 32.698 | 28.54  |        |        |  |  |        |
| 17.497 | 12.085 | 24.333 | 9.441  |        |        |  |  |        |
| 19.635 | 9.238  | 42.669 | 15.87  |        |        |  |  |        |
| 15.947 | 14.255 | 32.585 | 11.751 |        |        |  |  |        |
| 10.911 | 8.964  | 33.034 | 13.003 |        |        |  |  |        |
| 28.633 | 9.494  | 31.145 | 10.123 |        |        |  |  |        |
| 37.676 | 14.31  | 20.685 | 11.875 |        |        |  |  |        |
| 23.359 | 17.09  | 34.692 | 19.519 |        |        |  |  |        |
| 30.616 | 16.589 | 35.781 | 12.512 |        |        |  |  |        |
| 30.177 | 31.559 | 27.375 | 14.238 |        |        |  |  |        |
| 24.356 | 21.38  | 36.952 | 18.51  |        |        |  |  |        |
| 22.629 | 16.574 | 20.679 | 11.542 |        |        |  |  |        |
| 32.444 | 10.92  | 27.461 | 22.208 |        |        |  |  |        |
| 18.131 | 11.494 | 31.88  | 16.843 |        |        |  |  |        |
| 22.71  | 13.966 | 22.465 | 13.698 |        |        |  |  |        |
| 25.159 | 16.664 | 32.631 | 22.123 |        |        |  |  |        |
| 20.431 | 28.024 | 39.093 | 10.92  |        |        |  |  |        |
| 10.28  | 9.722  | 27.814 | 19.353 |        |        |  |  |        |
| 25.287 | 12.389 | 22.325 | 14.725 |        |        |  |  |        |
| 20.214 | 16.97  | 31.899 | 16.075 |        |        |  |  |        |
| 44.036 | 11.644 | 33.707 | 8.046  |        |        |  |  |        |
| 35.229 | 18.908 | 22.989 | 18.379 |        |        |  |  |        |
| 38.285 | 14.936 | 26.484 | 18.437 |        |        |  |  |        |
| 27.512 | 11.973 | 21.924 | 18.41  |        |        |  |  |        |
| 16.094 | 15.612 | 28.326 | 24.211 |        |        |  |  |        |
| 20.62  | 33.132 | 42.367 | 20.69  |        |        |  |  |        |
| 26.661 | 13.001 | 26.866 | 17.07  |        |        |  |  |        |
| 15.873 | 9.962  | 31.676 | 12.55  |        |        |  |  |        |
| 23.335 | 14.13  | 21.284 | 11.238 |        |        |  |  |        |
| 16.908 | 9.337  | 16.81  | 20.981 |        |        |  |  |        |
| 12.24  | 24.927 | 24.524 | 19.241 |        |        |  |  |        |
| 25.287 | 19.588 |        | 23.563 |        |        |  |  |        |
| 14.796 | 13.44  |        | 16.217 |        |        |  |  |        |
| 22.762 | 9.195  |        | 25.849 |        |        |  |  |        |
