# Supplementary material for: Filopodia powered by class x myosin promote fusion of mammalian myoblasts
Source: PubMed Central journal article supplement (PMC8500716; doi:10.7554/elife.72419), 2021-09-14
Supplement: elife-72419-fig4-figsupp1-data1.pdf [file elife-72419-fig4-figsupp1-data1.pdf]

|        |        |        |        |        |        |        |        |        |        |        |        |  |  |        |        |        |  |  |
|--------|--------|--------|--------|--------|--------|--------|--------|--------|--------|--------|--------|--|--|--------|--------|--------|--|--|
| 52.837 | 35.561 | 49.664 | 44.041 | 50.681 | 31.802 | 35.345 | 35.388 | 44.081 | 32.337 | 30.369 | 22.414 |  |  | 22.724 | 25.063 | 34.745 |  |  |
| 37.928 | 33.14  | 21.844 | 61.09  | 36.328 | 47.701 | 58.023 | 41.727 | 42.241 | 50.572 | 18.767 | 32.533 |  |  | 44.102 | 13.413 | 14.368 |  |  |
| 39.275 | 37.134 | 35.145 | 61.867 | 26.585 | 27.816 | 24.65  | 33.14  | 56.194 | 31.034 | 29.048 | 9.969  |  |  | 39.978 | 22.362 | 47.285 |  |  |
| 33.025 | 35.61  | 29.912 | 26.122 | 43.346 | 25.499 | 41.566 | 44.549 | 38.865 | 16.827 | 16.753 | 27.516 |  |  | 33.741 | 29.092 | 29.205 |  |  |
|        | 52.428 | 40.208 | 38.043 | 26.548 | 44.246 | 64.919 | 35.542 | 57.967 | 54.022 |        | 25.667 |  |  | 25.744 | 19.506 | 17.521 |  |  |
|        | 60.258 | 29.523 | 41.992 | 44.317 | 64.065 | 23.991 | 37.659 | 57.259 | 31.723 |        | 31.489 |  |  | 37.011 | 25.906 | 20.012 |  |  |
|        | 39.971 | 18.434 | 45.265 | 51.472 | 37.778 | 62.571 | 31.489 | 48.447 | 38.416 |        | 27.805 |  |  | 31.783 | 29.898 | 33.322 |  |  |
|        | 48.07  | 31.205 | 54.811 | 55.606 | 35.241 | 49.588 | 28.9   | 60.222 | 37.752 |        | 33.703 |  |  | 29.295 | 17.442 | 27.327 |  |  |
|        | 41.486 | 21.261 | 41.219 | 49.754 | 38.246 | 59.056 | 44.793 | 44.747 | 27.558 |        | 22.989 |  |  | 37.363 | 16.283 | 32.2   |  |  |
|        | 53.782 | 50.665 | 53.592 | 55.047 | 53.199 | 46.249 | 50.63  | 38.865 | 16.825 |        | 30.415 |  |  | 34.949 | 16.89  | 38.506 |  |  |
|        | 53.652 | 51.683 | 29.281 | 29.162 | 48.365 | 55.191 | 50.757 | 36.186 | 30.471 |        | 23.887 |  |  | 48.851 | 27.842 | 22.806 |  |  |
|        | 34.446 | 58.401 | 73.668 | 30.084 | 45.008 | 46.46  | 48.85  | 49.966 | 38.56  |        | 33.732 |  |  | 42.581 | 21.518 | 52.441 |  |  |
|        | 44.119 | 47.701 | 45.294 | 43.326 | 38.49  | 46.237 | 42.415 | 61.073 | 45.671 |        | 33.333 |  |  | 34.897 | 12.504 | 12.366 |  |  |
|        | 54.163 | 36.323 | 32.104 | 36.023 | 25.489 | 49.434 | 49.611 | 53.223 | 25.862 |        | 54.598 |  |  | 32.697 | 12.926 | 40.446 |  |  |
|        | 42.651 | 65.278 | 21.584 | 30.74  | 31.967 | 62.58  | 39.573 | 46.518 | 32.123 |        | 16.117 |  |  | 31.213 | 20.606 | 30.097 |  |  |
|        | 14.981 | 26.279 | 44.631 | 25.526 | 20.831 | 46.942 | 48.579 | 49.177 | 33.564 |        | 33.526 |  |  | 25.518 | 27.598 | 31.861 |  |  |
|        | 39.831 | 29.895 | 54.798 | 46.643 | 49.985 | 26.278 | 37.807 | 67.44  | 32.413 |        | 23.563 |  |  | 29.659 | 15.959 | 22.528 |  |  |
|        | 32.616 | 52.421 | 57.589 | 41.862 | 36.68  | 57.051 | 46.285 | 61.427 | 38.797 |        | 29.71  |  |  | 40.211 | 16.975 | 18.318 |  |  |
|        | 31.311 | 89.471 | 19.34  | 45.742 | 26.777 | 24.897 | 65.503 | 45.621 | 38.111 |        | 21.45  |  |  | 31.469 | 25.493 | 33.515 |  |  |
|        | 44.579 | 51.308 | 34.96  | 43.388 | 29.002 | 65.139 | 51.096 | 38.279 | 30.46  |        | 24.77  |  |  | 28.762 | 25.208 | 15.195 |  |  |
|        | 35.108 | 31.351 | 45.39  | 52.645 | 44.066 | 47.492 | 45.433 | 54.036 | 19.13  |        | 24.329 |  |  | 24.427 | 47.109 | 9.01   |  |  |
|        | 54.253 | 37.507 | 34.483 | 58.718 | 26.119 | 31.488 | 54.267 | 42.79  | 18.66  |        | 24.024 |  |  | 26.997 | 14.686 | 14.535 |  |  |
|        | 51.309 | 85.825 | 41.264 | 58.142 | 32.134 | 26.134 | 32.003 | 60.725 | 28.617 |        | 22.126 |  |  | 25.923 | 32.158 | 17.9   |  |  |
|        | 30.208 | 54.16  | 55.958 | 53.786 | 56.248 | 54.159 | 54.441 | 56.05  | 27.411 |        | 13.529 |  |  | 28.355 | 17.945 | 31.886 |  |  |
|        | 57.296 | 30.636 | 59.506 | 53.493 | 35.153 | 41.278 | 66.028 | 34.837 | 48.614 |        | 26.029 |  |  | 27.789 | 19.277 | 27.994 |  |  |
|        | 52.659 | 34.724 | 37.423 | 36.325 | 29.685 | 47.393 | 38.901 | 53.161 | 20.239 |        | 20.456 |  |  | 37.087 | 18.443 | 29.885 |  |  |
|        | 26.992 | 45.741 | 37.848 | 54.713 | 37.077 | 30.686 | 26.487 | 65.795 | 27.254 |        | 19.146 |  |  | 30.81  | 26.222 | 30.702 |  |  |
|        | 49.755 | 39.545 | 43.17  | 30.895 | 48.257 | 51.402 | 37.954 | 56.672 | 20.966 |        | 19.371 |  |  | 49.135 | 13.846 | 31.609 |  |  |
|        | 55.685 | 33.957 | 56.416 | 59.396 | 33.99  | 50.733 | 39.429 | 52.609 | 52.859 |        | 14.63  |  |  | 22.845 | 25.857 | 20.754 |  |  |
|        | 31.785 | 50.27  | 46.989 | 55.236 | 44.647 | 54.822 | 35.752 | 55.559 | 34.262 |        |        |  |  | 38.373 | 28.306 | 15.81  |  |  |
|        | 42.79  | 28.902 | 51.191 | 35.18  | 40.088 | 49.273 | 50.237 | 47.613 | 52.537 |        |        |  |  | 30.23  | 26.026 | 33.44  |  |  |
|        | 47.122 | 61.013 | 59.582 | 36.514 | 46.631 | 43.286 | 60.893 | 38.029 | 38.822 |        |        |  |  | 38.444 | 26.351 | 21.221 |  |  |
|        | 39.17  | 42.326 | 58.219 | 29.276 | 38.721 | 17.152 | 28.313 | 34.739 | 25.019 |        |        |  |  | 35.149 | 22.948 | 29.759 |  |  |
|        | 32.007 | 21.59  | 9.166  | 50.14  | 31.775 | 40.237 | 41.683 | 56.821 | 25.196 |        |        |  |  | 39.125 | 22.67  | 17.508 |  |  |
|        | 25.648 | 34.472 | 39.327 | 41.493 | 33.333 | 36.275 | 57.263 | 50.902 | 32.334 |        |        |  |  | 36.242 | 17.35  | 17.18  |  |  |
|        | 35.095 | 40.536 | 46.977 | 20.104 | 19.383 |        | 55.724 | 57.424 | 36.648 |        |        |  |  | 42.982 | 27.721 | 10.946 |  |  |
|        | 42.003 | 37.443 | 52.47  | 53.923 | 34.798 |        | 57.388 | 37.638 |        |        |        |  |  | 26.368 | 29.89  | 44.704 |  |  |
|        | 29.277 | 23.755 | 60.322 | 34.158 | 29.024 |        | 54.338 | 59.195 |        |        |        |  |  | 42.905 | 19.039 | 16.522 |  |  |
|        | 58.483 | 34.867 | 64.633 | 28.09  | 40.107 |        | 57.536 | 41.51  |        |        |        |  |  | 36.292 | 13.947 | 21.066 |  |  |
|        | 56.835 | 28.996 | 35.184 | 47.133 | 36.782 |        | 29.395 | 36.469 |        |        |        |  |  | 39.617 | 26.752 | 30.637 |  |  |
|        | 49.131 | 21.813 | 39.902 | 33.555 | 44.685 |        | 59.53  | 52.999 |        |        |        |  |  | 39.786 | 21.977 | 11.471 |  |  |
|        | 47.648 | 36.343 | 10.134 | 19.407 | 38.923 |        | 56.841 | 39.693 |        |        |        |  |  | 31.024 | 32.728 | 17.503 |  |  |
|        | 70.346 | 39.665 | 41.379 | 32.791 | 31.016 |        | 53.874 | 60.178 |        |        |        |  |  | 13.473 | 30.468 | 31.609 |  |  |
|        | 31.384 | 23.229 | 58.577 | 22.245 | 37.002 |        | 44.509 | 64.715 |        |        |        |  |  | 14.163 | 47.733 | 14.659 |  |  |
|        | 46.869 | 40.043 | 64.916 | 25.287 | 41.1   |        | 56.829 | 41.839 |        |        |        |  |  | 30.327 | 18.805 | 36.47  |  |  |
|        | 48.61  | 29.731 | 57.466 | 49.362 | 40.26  |        | 54.857 | 35.036 |        |        |        |  |  | 32.54  | 25.676 | 30.581 |  |  |
|        | 40.42  | 42.67  | 42.024 | 49.741 | 46.623 |        | 37.726 | 56.741 |        |        |        |  |  | 35.655 | 14.63  | 24.635 |  |  |
|        | 19.351 | 33.195 | 41.33  | 52.749 | 62.099 |        | 51.034 | 38.109 |        |        |        |  |  | 28.606 | 34.901 | 21.171 |  |  |
|        | 57.993 | 28.798 | 51.584 | 27.83  | 26.516 |        | 53.077 | 41.961 |        |        |        |  |  | 31.108 | 34.396 | 17.856 |  |  |
|        | 40.028 | 42.904 | 59.681 | 25.046 | 44.284 |        | 52.599 | 49.638 |        |        |        |  |  | 32.426 | 22     | 17.285 |  |  |
|        | 28.926 | 27.867 | 63.991 | 50.075 | 43.103 |        | 37.627 | 48.637 |        |        |        |  |  | 25.862 | 22.846 | 23.796 |  |  |
|        | 30.801 | 33.434 | 54.696 | 51.008 | 35.347 |        | 28.586 | 47.542 |        |        |        |  |  | 22.256 | 13.243 | 16.963 |  |  |
|        | 44.364 | 42.347 | 42.268 | 54.2   | 32.393 |        | 59.453 | 53.907 |        |        |        |  |  | 38.328 | 20.225 | 14.811 |  |  |

|  |        |        |        |        |        |  |        |        |  |  |  |        |        |        |  |  |
|--|--------|--------|--------|--------|--------|--|--------|--------|--|--|--|--------|--------|--------|--|--|
|  | 40.007 | 17.114 | 36.768 | 37.876 | 33.623 |  | 58.06  | 44.399 |  |  |  | 10.626 | 16.406 | 42.901 |  |  |
|  | 52.998 | 42.002 | 62.433 | 26.314 | 30.563 |  | 51.322 | 49.547 |  |  |  | 10.328 | 31.965 | 25.862 |  |  |
|  | 53.03  | 30.596 | 54.362 | 31.822 | 43.649 |  | 49.705 | 61.752 |  |  |  | 29.034 | 27.448 | 13.932 |  |  |
|  | 60.258 | 43.273 | 33.394 | 43.525 | 31.34  |  | 36.328 | 41.868 |  |  |  |        | 34.127 |        |  |  |
|  | 41.293 | 32.702 | 36.056 | 44.284 | 22.924 |  | 45.303 | 58.238 |  |  |  |        | 30.331 |        |  |  |
|  | 31.324 | 43.928 | 41.63  | 37.241 | 53.175 |  | 59.073 | 51.713 |  |  |  |        | 23.645 |        |  |  |
|  | 64.067 |        |        | 38.927 | 30.473 |  | 61.469 | 52.686 |  |  |  |        | 28.625 |        |  |  |
|  | 41.01  |        |        | 45.696 | 39.335 |  | 38.506 | 36.453 |  |  |  |        | 36.746 |        |  |  |
|  | 29.385 |        |        | 55.568 | 40.522 |  | 30.46  | 45.336 |  |  |  |        | 39.08  |        |  |  |
|  | 43.848 |        |        | 42.726 | 38.575 |  | 34.326 | 43.448 |  |  |  |        | 38.021 |        |  |  |
|  | 11.145 |        |        | 39.7   | 30.005 |  | 43.783 | 65.17  |  |  |  |        | 25.979 |        |  |  |
|  | 47.397 |        |        | 31.419 | 37.27  |  | 48.371 | 59.541 |  |  |  |        | 17.735 |        |  |  |
|  | 27.534 |        |        | 50.883 | 34.609 |  | 31.885 | 43.997 |  |  |  |        | 30.867 |        |  |  |
|  | 46.158 |        |        | 53.799 | 12.343 |  | 27.396 | 61.994 |  |  |  |        | 52.736 |        |  |  |
|  | 51.724 |        |        | 31.77  | 35.106 |  | 38.32  | 55.552 |  |  |  |        | 17.671 |        |  |  |
|  | 40.805 |        |        | 28.676 | 39.617 |  | 53.799 | 39.289 |  |  |  |        | 32.02  |        |  |  |
|  | 63.14  |        |        | 30.867 | 51.51  |  | 57.625 | 54.362 |  |  |  |        | 28.667 |        |  |  |
|  | 34.621 |        |        | 32.745 | 30.592 |  | 35.017 | 30.084 |  |  |  |        | 33.317 |        |  |  |
|  | 38.424 |        |        | 30.846 | 35.702 |  | 53.202 | 37.187 |  |  |  |        | 44.754 |        |  |  |
|  | 55.391 |        |        | 27.848 | 35.941 |  | 38.983 | 35.732 |  |  |  |        | 26.487 |        |  |  |
|  | 39.12  |        |        | 52.364 | 26.083 |  | 59.686 | 35.93  |  |  |  |        | 20.519 |        |  |  |
|  | 38.223 |        |        | 23.175 | 33.335 |  | 53.48  |        |  |  |  |        | 25.672 |        |  |  |
|  | 61.975 |        |        | 21.348 | 42.319 |  | 53.371 |        |  |  |  |        | 19.54  |        |  |  |
|  | 32.917 |        |        | 27.43  | 46.324 |  | 40.633 |        |  |  |  |        | 15.682 |        |  |  |
|  | 31.034 |        |        | 42.676 | 30.851 |  | 52.017 |        |  |  |  |        | 39.387 |        |  |  |
|  | 44.22  |        |        | 61.319 | 45.628 |  | 30.694 |        |  |  |  |        | 23.261 |        |  |  |
|  | 58.332 |        |        | 37.931 | 37.9   |  | 50.19  |        |  |  |  |        | 34.804 |        |  |  |
|  | 28.545 |        |        | 56.547 | 31.689 |  | 42.848 |        |  |  |  |        | 31.37  |        |  |  |
|  | 36.266 |        |        | 25.006 | 41.379 |  | 47.12  |        |  |  |  |        | 29.709 |        |  |  |
|  | 34.989 |        |        | 51.327 | 12.673 |  | 26.938 |        |  |  |  |        | 23.977 |        |  |  |
|  | 60.302 |        |        | 29.269 | 28.161 |  | 33.407 |        |  |  |  |        | 24.814 |        |  |  |
|  | 53.575 |        |        | 45.775 | 45.977 |  | 48.576 |        |  |  |  |        | 48.037 |        |  |  |
|  | 32.963 |        |        | 40.229 | 35.475 |  | 42.126 |        |  |  |  |        | 30.885 |        |  |  |
|  | 46.171 |        |        | 45.785 |        |  | 42.891 |        |  |  |  |        | 41.236 |        |  |  |
|  | 41.199 |        |        | 60.112 |        |  | 41.435 |        |  |  |  |        | 28.736 |        |  |  |
|  | 33.656 |        |        | 43.15  |        |  | 40.893 |        |  |  |  |        | 14.503 |        |  |  |
|  | 52.814 |        |        | 35.761 |        |  | 48.026 |        |  |  |  |        | 27.098 |        |  |  |
|  | 64.589 |        |        | 27.539 |        |  | 47.165 |        |  |  |  |        | 13.42  |        |  |  |
|  | 21.565 |        |        | 35.141 |        |  | 58.807 |        |  |  |  |        | 36.246 |        |  |  |
|  | 34.208 |        |        | 42.513 |        |  | 30.583 |        |  |  |  |        | 28.983 |        |  |  |
|  | 59.478 |        |        | 50.594 |        |  | 50.379 |        |  |  |  |        | 17.216 |        |  |  |
|  | 32.212 |        |        | 50.801 |        |  | 33.813 |        |  |  |  |        | 24.542 |        |  |  |
|  | 32.212 |        |        | 24.427 |        |  | 37.373 |        |  |  |  |        | 41.935 |        |  |  |
|  | 32.212 |        |        | 25.647 |        |  | 40.307 |        |  |  |  |        | 27.205 |        |  |  |
|  | 32.212 |        |        | 25.899 |        |  | 45.694 |        |  |  |  |        | 21.711 |        |  |  |
|  | 32.212 |        |        | 27.747 |        |  | 33.686 |        |  |  |  |        | 25.1   |        |  |  |
|  | 32.212 |        |        | 36.525 |        |  | 34.255 |        |  |  |  |        | 32.999 |        |  |  |
|  |        |        |        | 41.883 |        |  | 44.233 |        |  |  |  |        | 27.034 |        |  |  |
|  |        |        |        | 31.033 |        |  | 33.85  |        |  |  |  |        | 64.642 |        |  |  |
|  |        |        |        | 39     |        |  | 27.896 |        |  |  |  |        | 26.667 |        |  |  |
|  |        |        |        | 20.101 |        |  | 46.101 |        |  |  |  |        | 12.344 |        |  |  |
|  |        |        |        | 44.272 |        |  | 64.829 |        |  |  |  |        | 28.971 |        |  |  |
|  |        |        |        |        |        |  | 49.386 |        |  |  |  |        | 19.727 |        |  |  |

|  |  |  |  |  |  |  |        |  |  |  |  |  |  |  |        |  |  |  |
|--|--|--|--|--|--|--|--------|--|--|--|--|--|--|--|--------|--|--|--|
|  |  |  |  |  |  |  | 45.839 |  |  |  |  |  |  |  | 19.763 |  |  |  |
|  |  |  |  |  |  |  | 48.6   |  |  |  |  |  |  |  | 36.108 |  |  |  |
|  |  |  |  |  |  |  | 38.678 |  |  |  |  |  |  |  | 15.615 |  |  |  |
|  |  |  |  |  |  |  | 33.926 |  |  |  |  |  |  |  | 27.586 |  |  |  |
|  |  |  |  |  |  |  |        |  |  |  |  |  |  |  | 17.863 |  |  |  |
|  |  |  |  |  |  |  |        |  |  |  |  |  |  |  | 27.852 |  |  |  |
|  |  |  |  |  |  |  |        |  |  |  |  |  |  |  | 25.474 |  |  |  |
|  |  |  |  |  |  |  |        |  |  |  |  |  |  |  | 19.279 |  |  |  |
|  |  |  |  |  |  |  |        |  |  |  |  |  |  |  | 37.45  |  |  |  |
|  |  |  |  |  |  |  |        |  |  |  |  |  |  |  | 27.876 |  |  |  |
|  |  |  |  |  |  |  |        |  |  |  |  |  |  |  | 19.086 |  |  |  |
|  |  |  |  |  |  |  |        |  |  |  |  |  |  |  | 55.233 |  |  |  |
|  |  |  |  |  |  |  |        |  |  |  |  |  |  |  | 18.129 |  |  |  |
|  |  |  |  |  |  |  |        |  |  |  |  |  |  |  | 21.813 |  |  |  |
|  |  |  |  |  |  |  |        |  |  |  |  |  |  |  | 16.36  |  |  |  |
|  |  |  |  |  |  |  |        |  |  |  |  |  |  |  | 16.049 |  |  |  |
