# Supplementary material for: Filopodia powered by class x myosin promote fusion of mammalian myoblasts
Source: PubMed Central journal article supplement (PMC8500716; doi:10.7554/elife.72419), 2021-09-14

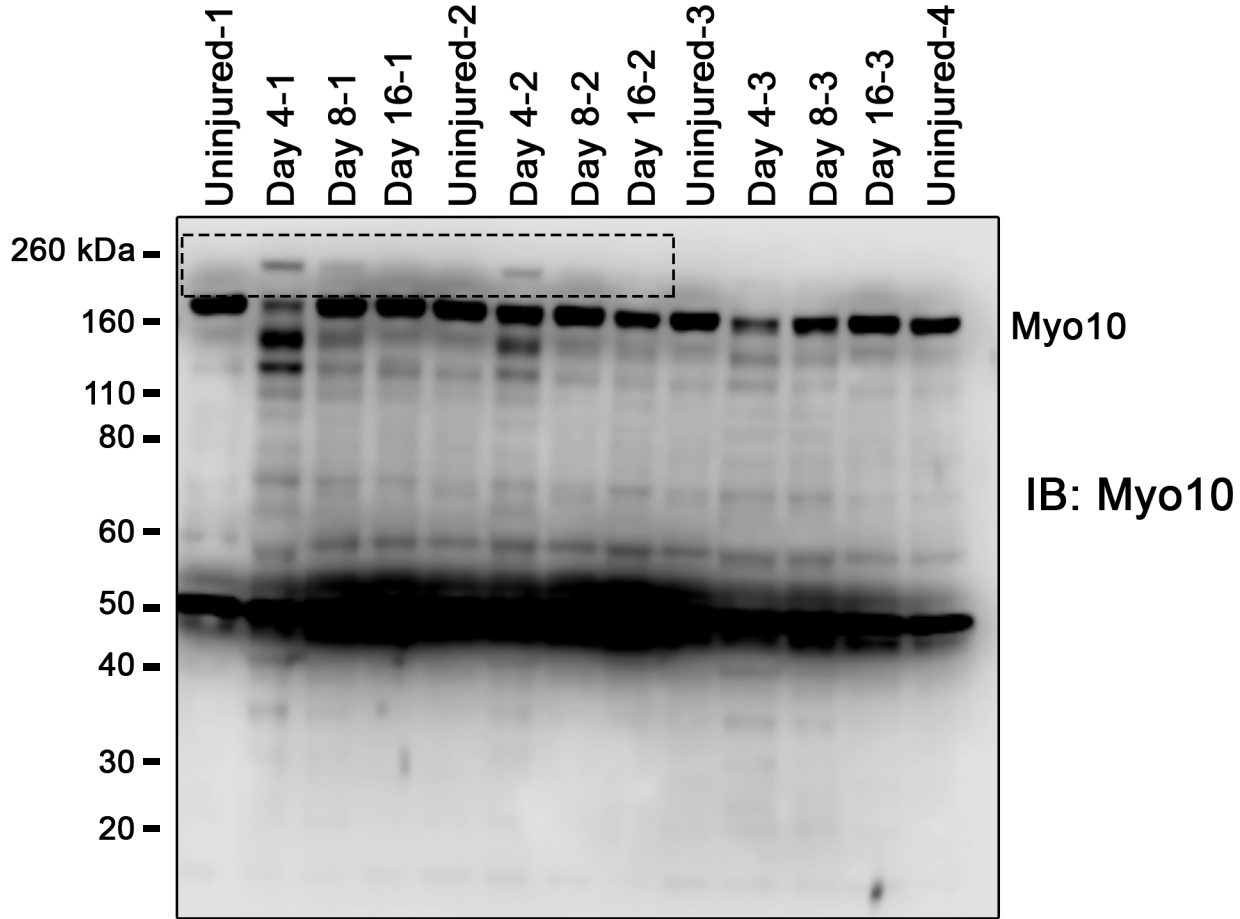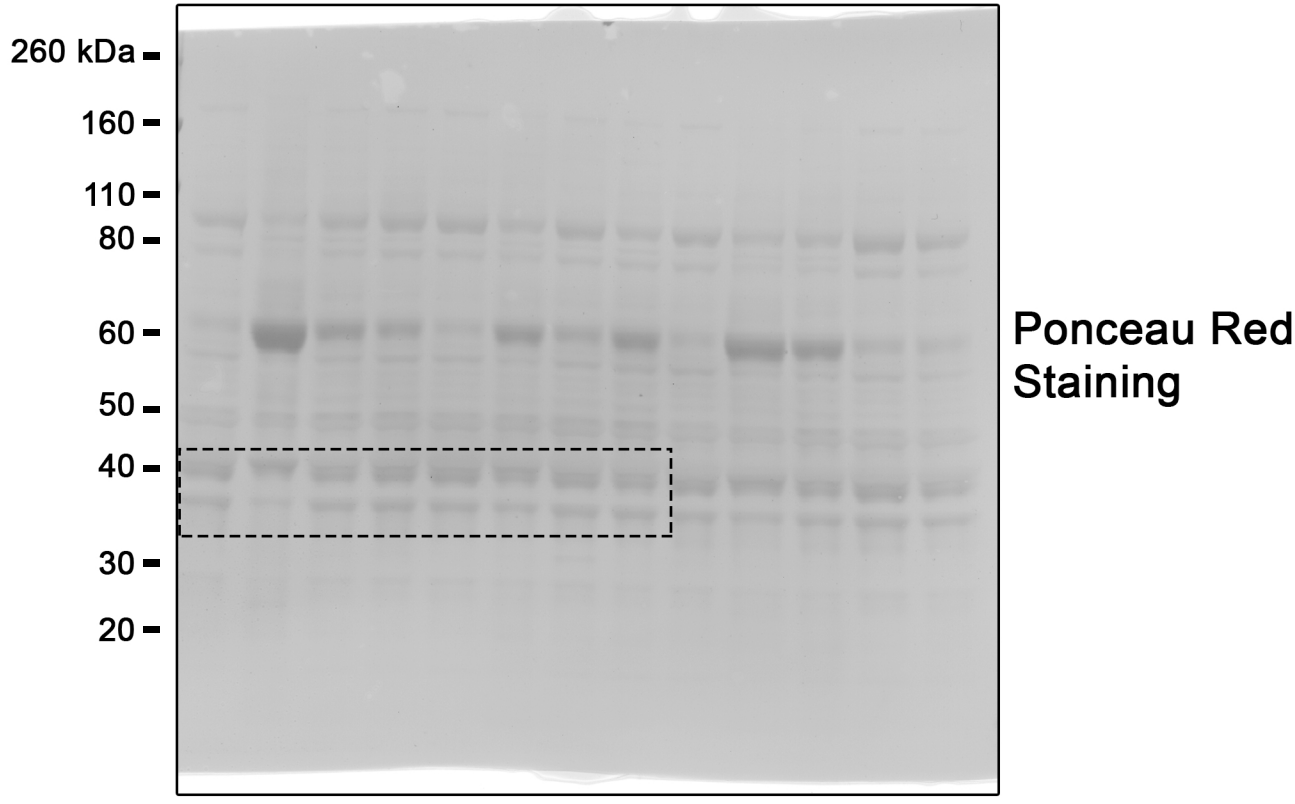

Supplement: elife-72419-fig4-figsupp1-data2.pdf [file elife-72419-fig4-figsupp1-data2.pdf]
