# Supplementary material for: Filopodia powered by class x myosin promote fusion of mammalian myoblasts
Source: PubMed Central journal article supplement (PMC8500716; doi:10.7554/elife.72419), 2021-09-14
Supplement: elife-72419-fig4-figsupp1-data3.pdf [file elife-72419-fig4-figsupp1-data3.pdf]

WT-CTX-Sham  
KO-CTX-Sham  
WT-CTX-Tam  
KO-CTX-Tam  
WT-Sham  
KO-Sham  
WT-Tam  
KO-Tam

260 kDa -  
160 -  
110 -  
80 -  
60 -  
50 -  
40 -  
30 -  
20 -

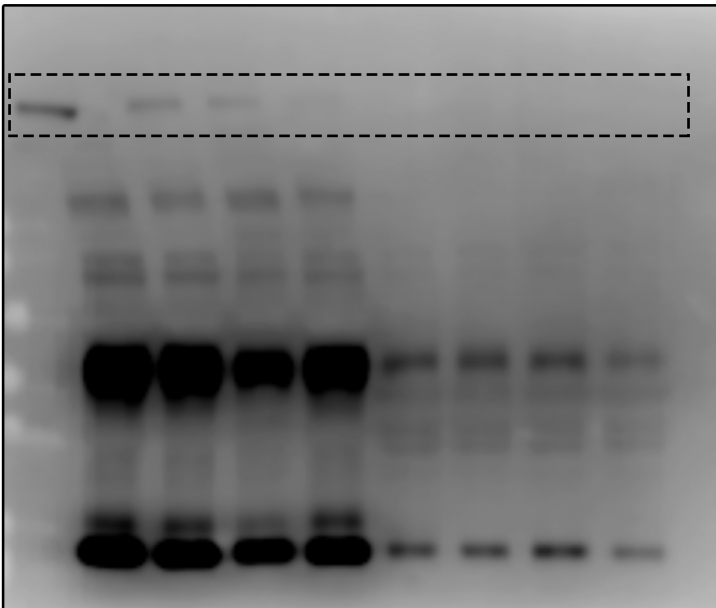

Myo10

IB: Myo10

260 kDa -  
160 -  
110 -  
80 -  
60 -  
50 -  
40 -  
30 -  
20 -

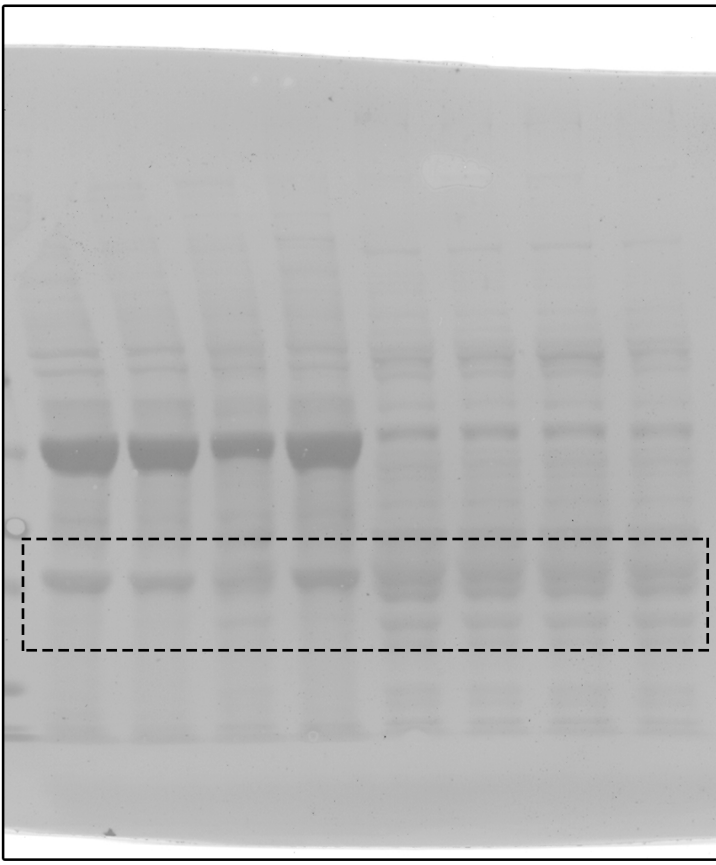

Ponceau Red  
Staining
