# Supplementary material for: Filopodia powered by class x myosin promote fusion of mammalian myoblasts
Source: eLife journal article supplement (doi:10.7554/elife.72419), 2021-09-14
Supplement: fig3-figsupp1-data2 [file elife-72419-fig3-figsupp1-data2-v2.pdf]

| RFP_1_1     | RFP_1_2     | RFP_1_3     | RFP_1_4     | RFP_1_5     | RFP_2_1     |
|-------------|-------------|-------------|-------------|-------------|-------------|
| Length (um) | Length (um) | Length (um) | Length (um) | Length (um) | Length (um) |
| 0.39        | 0.8         | 0.26        | 0.33        | 0.19        | 0.49        |
| 0.24        | 0.55        | 0.34        | 1.54        | 0.14        | 0.37        |
| 0.87        | 0.29        | 0.53        | 1.07        | 1.1         | 0.39        |
| 0.29        | 0.34        |             | 0.44        | 0.13        | 0.39        |
| 0.14        |             |             | 0.61        | 0.5         | 0.36        |
| 0.43        |             |             |             | 0.19        | 1.26        |
| 0.29        |             |             |             | 0.32        |             |
| 0.28        |             |             |             |             |             |
| 0.62        |             |             |             |             |             |
|             |             |             |             |             |             |
|             |             |             |             |             |             |
|             |             |             |             |             |             |
|             |             |             |             |             |             |
|             |             |             |             |             |             |
|             |             |             |             |             |             |
|             |             |             |             |             |             |
| FL_1_1      | FL_1_2      | FL_1_3      | FL_1_4      | FL_1_5      | FL_1_6      |
| Length (um) | Length (um) | Length (um) | Length (um) | Length (um) | Length (um) |
| 2.47        | 2.29        | 2.58        | 4.2         | 4.76        | 2.94        |
| 1.92        | 0.69        | 2.88        | 0.96        | 0.58        | 6.43        |
| 2.33        | 0.34        | 3.53        | 2.15        | 1.07        | 2.8         |
| 1.46        | 0.88        | 3.19        | 1.96        | 1.15        | 10.62       |
| 3           | 1.15        | 4.04        | 1.83        | 1.11        | 1.94        |
| 4.99        | 1.41        | 3.6         | 2.08        | 2.11        | 12.1        |
| 6.45        | 1.15        | 4.54        | 1.33        | 1.79        | 4.63        |
| 3.45        | 3.92        | 2.53        | 2.18        | 3.9         | 4.42        |
| 7.49        | 1.46        | 2.79        | 3.48        | 1.88        | 2.63        |
| 3.38        | 4.22        | 1.93        | 2.91        | 3.24        | 1.48        |
| 2.74        | 7.88        | 3.37        | 1.8         | 3.89        | 4.73        |
| 3.49        | 3.22        | 5.17        | 1.87        | 3.41        | 3.47        |
| 1.52        | 3.22        | 3.2         | 5.78        | 4.87        | 3.98        |
| 1.1         | 1.57        | 3.78        | 6.04        | 1.32        | 7.07        |
| 1.61        | 1.89        | 2.7         | 7.53        | 0.69        | 6.41        |
| 0.9         | 6.94        | 2.56        | 1.72        | 5.2         | 7.2         |
| 2.03        | 1.52        | 2.87        | 3.47        | 1.54        | 5.84        |
| 1.32        | 2.99        | 3.24        | 5.89        | 3.78        | 5.74        |
| 3.77        | 1.84        | 2.43        | 2.01        | 3.15        | 3.7         |
| 4.86        | 2.86        | 2.19        | 1.57        | 1.4         | 7.44        |
| 0.65        | 1.63        | 3.94        | 1.3         | 2.17        | 3.7         |
| 3.24        | 0.8         | 5.61        | 3.47        | 5.22        | 4.12        |
| 3.41        | 7.6         | 4.16        | 3.54        | 2.37        | 6.35        |
| 3.79        | 10.45       | 1.27        | 2.24        | 5.13        | 8.56        |
|             | 1.72        | 1.97        | 1.61        |             | 8.68        |

|  |       |       |  |  |       |
|--|-------|-------|--|--|-------|
|  | 0.88  | 18.24 |  |  | 15.87 |
|  | 2.727 | 7.78  |  |  | 19.21 |
|  | 1.99  | 6.7   |  |  | 9.61  |
|  | 2.79  | 11.74 |  |  | 12.67 |
|  | 3.33  | 2.12  |  |  | 14.57 |
|  | 1.32  | 1.26  |  |  | 10.82 |
|  | 4.23  | 1.23  |  |  | 11.49 |
|  | 3.46  | 2.76  |  |  | 4.57  |
|  | 2.47  | 2.52  |  |  | 13.69 |
|  | 1.49  | 2.09  |  |  | 13.87 |
|  | 2.12  | 0.91  |  |  | 4.47  |
|  | 1.61  | 2.78  |  |  | 1.12  |
|  | 2.77  | 1.89  |  |  | 5.14  |
|  | 2.07  | 1.98  |  |  | 6.75  |
|  | 1.64  | 2.17  |  |  | 10.75 |
|  | 3.44  | 1.23  |  |  |       |
|  | 1.97  | 0.81  |  |  |       |
|  | 4.21  | 0.92  |  |  |       |
|  | 2.93  | 2.07  |  |  |       |
|  | 4.33  | 1.54  |  |  |       |
|  | 0.81  | 1.88  |  |  |       |
|  | 2.32  | 0.48  |  |  |       |
|  | 0.52  | 0.59  |  |  |       |
|  | 0.93  | 0.26  |  |  |       |
|  | 3.03  | 2.09  |  |  |       |
|  | 2.27  | 1.52  |  |  |       |
|  | 5.49  | 1.73  |  |  |       |
|  | 4.06  | 1.94  |  |  |       |
|  | 4.31  | 0.153 |  |  |       |
|  | 2.49  | 0.72  |  |  |       |
|  | 0.56  | 2.38  |  |  |       |
|  | 3.22  | 2.77  |  |  |       |
|  | 4.49  | 3.14  |  |  |       |
|  | 7.55  | 1.8   |  |  |       |
|  | 10.8  | 1.93  |  |  |       |
|  | 11.71 | 1.7   |  |  |       |
|  | 8.91  | 2.63  |  |  |       |
|  | 8.06  |       |  |  |       |
|  | 6.76  |       |  |  |       |
|  | 5.24  |       |  |  |       |
|  | 7.77  |       |  |  |       |
|  | 11.14 |       |  |  |       |
|  | 2.91  |       |  |  |       |
|  | 3.28  |       |  |  |       |
|  |       |       |  |  |       |
|  |       |       |  |  |       |
|  |       |       |  |  |       |

|             |             |             |             |             |             |
|-------------|-------------|-------------|-------------|-------------|-------------|
|             |             |             |             |             |             |
|             |             |             |             |             |             |
|             |             |             |             |             |             |
|             |             |             |             |             |             |
|             |             |             |             |             |             |
|             |             |             |             |             |             |
|             |             |             |             |             |             |
|             |             |             |             |             |             |
|             |             |             |             |             |             |
|             |             |             |             |             |             |
| dCBD_1_1    | dCBD_1_2    | dCBD_1_3    | dCBD_1_4    | dCBD_1_5    | dCBD_1_6    |
| Length (um) | Length (um) | Length (um) | Length (um) | Length (um) | Length (um) |
| 6.87        | 3.17        | 1.92        | 1.25        | 3.87        | 4.2         |
| 1.58        | 3.99        | 1.84        | 6.48        | 4.38        | 5.89        |
| 2.04        | 4.46        | 3.05        | 4.41        | 1.83        | 6.21        |
| 2.96        | 3.83        | 4.65        | 5.58        | 4.64        | 2.57        |
| 1.83        | 3.77        | 4.19        | 4.21        | 3.58        | 2.09        |
| 2.53        | 5.53        | 3.27        | 6.95        | 2.98        | 4.5         |
| 1.64        | 2.19        | 5.59        | 10.15       | 0.83        | 1.8         |
| 2.96        | 9.12        | 4.79        | 1.97        | 1.72        | 4.11        |
| 4.82        | 5.46        | 3.9         | 7.43        | 2.64        | 7.65        |
| 3.4         | 1.14        | 4.09        | 2.37        | 4.7         | 8.01        |
| 5.65        | 3.4         | 7.8         | 3.24        | 6.72        | 5.99        |
| 1.79        | 3.99        | 8.51        | 2.73        | 1.76        | 8.07        |
| 6.3         | 7.17        | 6.71        | 1.7         | 2.47        | 0.88        |
| 5.43        | 7.92        | 2.06        | 6.62        | 2.32        | 1.19        |
| 2.87        | 1.64        | 4.56        | 3.39        | 5.04        | 4.26        |
| 5.63        | 1.7         | 12.53       | 8.6         | 3.87        | 3           |
| 8.03        | 1.43        | 7.02        | 5.66        | 1.98        | 12.97       |
|             | 1.81        | 4.54        | 2.33        | 2.99        | 3.37        |
|             | 2.09        | 3.45        | 4.53        | 2.39        | 6.85        |
|             |             | 4.74        | 2.15        | 1.45        | 6.46        |
|             |             | 12.05       | 10.14       | 2.15        | 5.79        |
|             |             | 8.4         | 10.07       | 2.69        | 9.04        |
|             |             | 7.09        | 12.08       | 4.47        | 4.59        |
|             |             | 9.99        | 7.04        | 2.58        | 9.3         |
|             |             | 7.52        | 8.89        | 2.75        | 7.75        |
|             |             | 4.94        | 11.17       |             | 2.1         |
|             |             | 5.43        | 6.55        |             |             |
|             |             | 4.8         | 2.43        |             |             |
|             |             | 3.99        | 7.73        |             |             |
|             |             | 1.05        | 6.67        |             |             |
|             |             | 1.92        | 5.78        |             |             |
|             |             | 1.84        | 16.81       |             |             |
|             |             | 3.05        | 15.63       |             |             |
|             |             | 4.65        | 15.59       |             |             |

|  |  |       |      |  |  |
|--|--|-------|------|--|--|
|  |  | 4.19  | 7.08 |  |  |
|  |  | 3.27  | 6.13 |  |  |
|  |  | 5.59  | 6.08 |  |  |
|  |  | 4.79  | 8.2  |  |  |
|  |  | 3.9   | 8.03 |  |  |
|  |  | 4.09  | 4.58 |  |  |
|  |  | 7.8   | 4.01 |  |  |
|  |  | 8.51  | 5.05 |  |  |
|  |  | 6.71  | 6.36 |  |  |
|  |  | 2.06  | 7.36 |  |  |
|  |  | 4.56  | 3.52 |  |  |
|  |  | 12.53 | 5.98 |  |  |
|  |  | 7.02  | 6.03 |  |  |
|  |  | 4.54  |      |  |  |
|  |  | 3.45  |      |  |  |
|  |  | 4.74  |      |  |  |
|  |  | 12.05 |      |  |  |
|  |  | 8.4   |      |  |  |
|  |  | 7.09  |      |  |  |
|  |  | 9.99  |      |  |  |
|  |  | 7.52  |      |  |  |
|  |  | 4.94  |      |  |  |
|  |  | 5.43  |      |  |  |
|  |  | 4.8   |      |  |  |
|  |  | 3.99  |      |  |  |
|  |  | 1.05  |      |  |  |
|  |  |       |      |  |  |
|  |  |       |      |  |  |

**Fig S3C-D Projection nu**

| RFP_2_2     | RFP_2_3     | RFP_2_4     | RFP_2_5     | RFP_3_1     | RFP_3_2     | RFP_3_3     |
|-------------|-------------|-------------|-------------|-------------|-------------|-------------|
| Length (um) | Length (um) | Length (um) | Length (um) | Length (um) | Length (um) | Length (um) |
| 0.5         | 0.65        | 0.24        | 0.08        | 0.25        | 0.21        | 0.22        |
| 0.45        | 0.25        | 0.2         | 0.23        | 0.3         | 0.11        | 0.33        |
| 0.61        | 0.27        | 0.4         | 0.3         | 0.2         | 0.59        | 0.35        |
| 0.52        | 0.38        | 0.27        | 0.08        | 0.22        | 0.17        | 0.15        |
| 0.38        | 0.4         | 0.45        | 0.19        | 0.07        | 0.21        | 0.31        |
| 0.3         |             |             | 0.13        | 0.41        | 0.25        | 0.39        |
|             |             |             | 0.25        | 0.37        | 0.28        | 0.6         |
|             |             |             | 0.17        |             | 0.54        | 0.26        |
|             |             |             | 0.34        |             | 0.34        | 0.34        |
|             |             |             |             |             |             | 0.11        |
|             |             |             |             |             |             | 0.2         |
|             |             |             |             |             |             | 0.37        |
|             |             |             |             |             |             |             |
|             |             |             |             |             |             |             |
|             |             |             |             |             |             |             |
|             |             |             |             |             |             |             |
|             |             |             |             |             |             |             |
|             |             |             |             |             |             |             |
|             |             |             |             |             |             |             |
| FL_1_7      | FL_1_8      | FL_1_9      | FL_1_10     | FL_2_1      | FL_2_2      | FL_2_3      |
| Length (um) | Length (um) | Length (um) | Length (um) | Length (um) | Length (um) | Length (um) |
| 5.73        | 1.98        | 1.56        | 3.84        | 2.5         | 5.15        | 2.99        |
| 2.05        | 1.05        | 3.4         | 3.25        | 1.85        | 1.65        | 4.15        |
| 1.98        | 1.22        | 2.27        | 4.04        | 3.38        | 3.63        | 2.15        |
| 5.66        | 0.54        | 5.51        | 1.18        | 3.45        | 5.48        | 2.26        |
| 3.41        | 1.65        | 10.36       | 4.16        | 1.75        | 3.56        | 5.58        |
| 6.17        | 3.83        | 4.45        | 1.9         | 4.15        | 2.19        | 6.84        |
| 8.25        | 3.12        | 10.81       | 0.86        | 4.96        | 7.03        | 3.74        |
| 1.42        | 5.51        | 5.36        | 1.41        | 1.61        | 2.99        | 2.83        |
| 1.72        | 1.5         | 4.83        | 2.47        | 3.22        | 3.6         | 5.98        |
| 5.01        | 5.34        | 2.27        | 3.9         | 5.41        | 3.86        | 2.34        |
| 2.81        | 6.35        | 3.03        | 4.17        | 3.38        | 2.05        | 3.23        |
| 3.14        | 4.12        | 7.5         | 2.04        | 4.17        | 5.56        | 4.25        |
| 6.85        | 5.57        | 7.45        | 2.23        | 2.37        | 10.99       | 4.12        |
| 6.01        | 3.58        | 8.98        | 1.87        | 4.19        | 3.89        | 1.64        |
| 4.28        | 3.1         | 9.77        | 1.52        | 4.05        | 4.17        | 1.79        |
| 3.75        | 4.5         | 6.91        | 1.65        | 2           | 9.05        | 4.62        |
| 4.58        | 3.33        | 2.03        | 5.51        | 1.45        | 7.06        | 1.25        |
| 5.66        | 3.69        | 4.83        | 4.12        | 2.62        | 4.17        | 1.88        |
| 6.65        | 5.23        | 10.36       | 4.19        | 1.44        | 1.71        | 3.49        |
| 8.73        | 5.33        | 4.45        | 3.31        | 1.71        | 1.89        | 2.12        |
| 8.78        | 4.51        | 10.81       | 7.23        | 2.45        | 6.43        | 2.46        |
| 5.32        | 6.37        | 5.36        | 4.46        | 3.24        | 4.36        | 1.17        |
| 10.69       | 5.89        | 3.03        | 2.34        | 6.71        | 3.9         | 7.65        |
| 9.36        | 9.44        | 12.29       | 5.64        | 5.32        | 4.6         | 4.34        |
| 6.08        | 4.45        | 5.83        | 2.28        | 2.54        | 2           | 5.42        |

|       |       |       |       |      |       |       |
|-------|-------|-------|-------|------|-------|-------|
| 7.1   | 5.43  | 11.52 | 2.99  | 3.58 | 4.46  | 2.54  |
| 9.2   | 4.99  |       | 2.13  | 4.96 | 6.19  | 2.94  |
| 10.67 | 7.25  |       | 7.29  | 5.47 | 3.51  | 4.16  |
| 6.22  | 6.25  |       | 4.25  | 6.57 | 9.38  | 5.69  |
| 5.09  | 7.67  |       | 0.77  | 6.8  | 9.94  | 4.61  |
| 5.05  | 9.8   |       | 5.59  | 6.13 | 6.91  | 5.04  |
| 4.93  | 11.03 |       | 5.25  | 6.75 | 6.23  | 7.97  |
| 3.76  | 12.76 |       | 9.46  |      | 4.09  | 4.75  |
| 10.08 | 6.03  |       | 12.21 |      | 3.95  | 4.07  |
| 6.19  | 3.68  |       | 5.68  |      | 8.15  | 2.61  |
| 4.91  | 6.34  |       | 4.64  |      | 4.86  | 5.77  |
|       | 7.36  |       | 4.26  |      | 12.17 | 1     |
|       | 1.02  |       | 5.57  |      |       | 7.97  |
|       | 3.4   |       | 4.35  |      |       | 7.05  |
|       | 4.21  |       | 2.61  |      |       | 3.82  |
|       |       |       | 4.27  |      |       | 3.05  |
|       |       |       | 3.8   |      |       | 1.23  |
|       |       |       |       |      |       | 4.87  |
|       |       |       |       |      |       | 3.73  |
|       |       |       |       |      |       | 11.06 |
|       |       |       |       |      |       | 7.92  |
|       |       |       |       |      |       | 10.25 |
|       |       |       |       |      |       | 2.4   |
|       |       |       |       |      |       | 5.51  |
|       |       |       |       |      |       | 9.39  |
|       |       |       |       |      |       | 7.59  |
|       |       |       |       |      |       | 2.92  |
|       |       |       |       |      |       | 6.01  |
|       |       |       |       |      |       | 12.44 |
|       |       |       |       |      |       | 6.66  |
|       |       |       |       |      |       | 1.08  |
|       |       |       |       |      |       | 1.63  |
|       |       |       |       |      |       | 2.92  |
|       |       |       |       |      |       | 3.75  |
|       |       |       |       |      |       | 1.83  |
|       |       |       |       |      |       | 2.86  |
|       |       |       |       |      |       | 4.35  |
|       |       |       |       |      |       | 1.69  |
|       |       |       |       |      |       | 5.17  |
|       |       |       |       |      |       | 4.17  |
|       |       |       |       |      |       | 1.21  |
|       |       |       |       |      |       | 2.98  |
|       |       |       |       |      |       | 4.24  |
|       |       |       |       |      |       | 3.87  |
|       |       |       |       |      |       | 3.29  |
|       |       |       |       |      |       | 3.65  |
|       |       |       |       |      |       | 3.75  |

|             |             |             |             |             |             | 1.78        |
|-------------|-------------|-------------|-------------|-------------|-------------|-------------|
|             |             |             |             |             |             | 1.49        |
|             |             |             |             |             |             | 3.1         |
|             |             |             |             |             |             | 2.22        |
|             |             |             |             |             |             | 2.28        |
|             |             |             |             |             |             | 1.83        |
|             |             |             |             |             |             | 2.68        |
|             |             |             |             |             |             | 3.65        |
|             |             |             |             |             |             | 1.46        |
|             |             |             |             |             |             | 2.53        |
| dCBD_1_7    | dCBD_1_8    | dCBD_1_9    | dCBD_1_10   | dCBD_2_1    | dCBD_2_2    | dCBD_2_3    |
| Length (um) | Length (um) | Length (um) | Length (um) | Length (um) | Length (um) | Length (um) |
| 2.07        | 7           | 10.06       | 4.16        | 10.23       | 3.68        | 2.51        |
| 5.91        | 6.11        | 7.24        | 2.65        | 8.83        | 3.54        | 2.07        |
| 3.52        | 8.7         | 12.62       | 7.87        | 4.76        | 2.46        | 1.88        |
| 7.44        | 11.12       | 14.27       | 12.39       | 3.23        | 2.21        | 1.81        |
| 7.62        | 3.78        | 13.7        | 10.86       | 4.82        | 3.92        | 1.71        |
| 0.73        | 1.33        | 5.6         | 8.16        | 1.39        | 2.29        | 3.77        |
| 1.58        | 7.46        | 11.59       | 6.09        | 2.81        | 5.72        | 1.41        |
| 5.6         | 9.45        | 11.36       | 5.49        | 2.48        | 6.61        | 1.88        |
| 3.7         | 3.57        | 5.39        | 0.33        | 2.34        | 7.11        | 2.14        |
| 10          | 5.31        | 10.5        | 2.47        | 4.27        | 8.67        | 1.94        |
| 8           | 4.57        | 5.7         | 4.49        | 3.14        | 7.4         | 3.97        |
| 7.6         | 1.26        | 6.03        | 2.54        | 6.34        | 8.83        | 5.42        |
| 2.75        | 0.89        | 6.85        | 3.82        | 1.86        | 4.84        | 8.02        |
| 4           | 1.44        | 3.26        | 6.33        | 6.96        | 5.56        | 5.16        |
| 3.2         | 1.97        | 3.12        | 4.76        | 4.18        | 4.03        | 3.95        |
| 2.51        | 1.92        | 3.48        | 4.81        | 1.82        | 5.06        | 1.7         |
| 3.99        | 4.4         | 4.95        | 3.82        | 3.65        | 7.65        | 2.33        |
| 1.01        | 4.53        | 10.85       | 1.47        | 4.39        | 3.25        | 7.04        |
| 3.17        | 2.48        | 10.06       | 0.99        | 1.81        | 10.23       | 8.32        |
| 1.19        | 1.34        | 3.7         | 2.54        | 1.85        | 8.83        | 3.66        |
| 1.35        | 1.36        | 1.69        | 2.06        | 1.97        | 4.76        | 4.34        |
| 0.98        | 2.07        | 2.82        | 3.83        | 2.27        | 3.23        | 4.95        |
| 2.35        | 0.88        | 5.08        | 5.12        |             | 4.82        | 8.6         |
| 5.62        | 1.13        | 3.44        | 3.47        |             | 1.39        | 11          |
| 3.33        | 1.61        |             | 1.83        |             | 2.81        | 10.67       |
| 1.1         | 1.99        |             | 2.66        |             | 2.48        | 10.19       |
| 0.86        | 1.77        |             | 2.39        |             | 2.34        | 10.06       |
| 0.65        | 2.11        |             | 3.77        |             | 4.27        | 8.68        |
| 1.09        |             |             | 4.64        |             | 3.14        | 8.84        |
| 1.57        |             |             | 3.29        |             | 6.34        | 4.61        |
| 0.54        |             |             | 10.55       |             | 1.86        | 3.81        |
| 2.07        |             |             | 4.89        |             | 6.96        | 3.56        |
| 1.6         |             |             | 3.55        |             | 4.18        | 2.48        |
| 2.25        |             |             | 1.79        |             | 1.82        | 3.66        |





**Numbers and lengths following expression of RFP, RFP-Myo10, or RFP-Myo10dCBD**

| RFP_3_4     | RFP_3_5     | RFP_4_1     | RFP_4_2     | RFP_4_3     | RFP_4_4     | RFP_4_5     |
|-------------|-------------|-------------|-------------|-------------|-------------|-------------|
| Length (um) | Length (um) | Length (um) | Length (um) | Length (um) | Length (um) | Length (um) |
| 0.24        | 0.11        | 0.17        | 0.47        | 0.18        | 0.45        | 0.27        |
| 0.22        | 0.12        | 0.09        | 0.26        | 0.41        | 0.24        | 0.18        |
| 0.39        | 0.4         | 0.14        | 0.23        | 0.64        | 0.21        | 0.21        |
| 0.2         | 0.64        | 0.26        | 0.39        | 0.15        | 0.18        | 0.38        |
| 0.17        | 0.11        | 0.12        | 0.54        | 0.15        | 0.24        | 0.33        |
| 0.24        | 0.41        | 0.49        | 0.14        | 0.25        | 0.03        | 0.12        |
| 0.11        | 0.08        | 0.45        | 0.19        | 0.47        | 0.17        | 0.17        |
| 0.22        | 0.17        | 0.45        | 0.26        | 0.26        | 0.2         | 0.17        |
| 0.4         | 0.29        | 0.16        | 0.26        |             | 0.46        | 0.32        |
|             | 0.14        | 0.06        | 0.23        |             | 0.28        | 0.3         |
|             | 0.15        | 0.3         | 0.27        |             | 0.14        | 0.38        |
|             | 0.03        | 0.27        | 0.37        |             | 0.11        |             |
|             |             | 0.17        | 0.37        |             |             |             |
|             |             | 0.12        | 0.32        |             |             |             |
|             |             | 0.04        |             |             |             |             |
| FL_2_4      | FL_2_5      | FL_2_6      | FL_2_7      | FL_2_8      | FL_2_9      | FL_2_10     |
| Length (um) | Length (um) | Length (um) | Length (um) | Length (um) | Length (um) | Length (um) |
| 5.14        | 4.29        | 2.45        | 2.17        | 6.9         | 1.45        | 3.26        |
| 5.33        | 5.12        | 2.76        | 2.49        | 7.49        | 6.79        | 1.69        |
| 3.75        | 3.51        | 4.18        | 4.19        | 1.67        | 6.91        | 2.99        |
| 3.56        | 4.37        | 4.42        | 4.87        | 4.28        | 4.9         | 3.59        |
| 4.03        | 6.12        | 3.17        | 2.72        | 2.54        | 12.52       | 4.15        |
| 2.75        | 3.66        | 4.26        | 5.56        | 4.5         | 8.19        | 2.35        |
| 2.18        | 4.45        | 1.88        | 1.07        | 2.98        | 6.74        | 3.97        |
| 1.45        | 4.2         | 2.01        | 3.21        | 1.65        | 5.18        | 4.76        |
| 1.23        | 1.86        | 2.27        | 2.67        | 4.25        | 2.92        | 5.11        |
| 1.8         | 0.9         | 1.85        | 3.25        | 5.03        | 2.98        | 6.34        |
| 0.88        | 2.93        | 1.42        | 4.87        | 4.01        | 4.7         | 5.79        |
| 3.05        | 3.53        | 5.26        | 5.21        | 4.82        | 3.32        | 4.79        |
| 2.3         | 3.57        | 4.38        | 4.85        | 3.55        | 4.25        | 9.27        |
| 1.1         | 5.24        | 2.13        | 1.36        | 3.09        | 6.08        | 19.19       |
| 2.46        | 4.17        | 5.08        | 4.25        | 2.6         | 2.97        | 7.2         |
| 1.41        | 9.66        | 4.9         | 4.9         | 4.37        | 2.08        | 7.59        |
| 2.83        | 2.68        | 4.27        | 6.29        | 5.58        | 4.46        | 0.99        |
| 1.55        | 3.62        | 10.55       | 4.16        | 3.35        | 2.08        | 2.36        |
| 2.87        | 3.08        | 3.4         | 2.41        | 4.31        | 5.28        | 2.43        |
| 5.1         | 2.95        | 3.98        | 3.98        | 3.18        | 5.82        | 2.64        |
| 2.05        | 3.25        | 2.8         | 3.54        | 3.61        | 5.18        | 6.68        |
| 2.32        | 5.32        | 4.11        | 4.95        | 2.04        | 3.44        | 6.45        |
| 3.98        | 7.53        | 3.6         | 4           | 2.17        | 1.81        | 9           |
| 1.62        | 5.76        | 6.88        | 5.72        | 2.41        | 2.55        | 6.79        |
| 2.32        | 6.87        | 7.6         | 1.75        | 1.28        | 2.7         | 5.79        |

|      |      |       |       |      |      |       |
|------|------|-------|-------|------|------|-------|
| 1.68 | 3.4  | 3.11  | 6.28  | 2.82 | 4.59 | 11.53 |
| 2.19 | 1.75 | 7.19  | 3.73  | 3.19 | 1.63 | 8.45  |
| 2.03 | 2.38 | 1.89  | 5.05  | 3.26 | 6.15 | 4.74  |
| 1.83 | 5.85 | 1.45  | 1.85  | 2.19 | 4.46 | 9.22  |
| 1.47 | 5.95 | 1.25  | 2.76  | 2.5  | 5.45 | 5.78  |
| 1.51 | 1.97 | 2.09  | 3.08  | 3.14 | 2.79 | 5.42  |
| 1.28 | 3.47 | 2.48  | 4.09  | 1.17 | 5.08 | 8.01  |
| 2.5  | 2.18 | 3.13  | 3.55  | 3.28 | 3.01 | 3.8   |
| 1.72 | 4.9  | 4.69  | 5.31  | 2.91 | 3.76 | 4.71  |
|      | 2.98 | 1.53  | 1.64  | 3.86 | 8.07 | 9.52  |
|      | 3.2  | 1.11  | 2.14  | 2.19 | 2.85 | 6.38  |
|      | 2.94 | 1.65  | 3.81  | 2.45 | 7.24 | 6.62  |
|      | 5.11 | 3.18  | 0.91  | 3.24 | 6.34 | 2.45  |
|      | 5.91 | 1.49  | 5.59  | 1.5  | 6.02 | 8.55  |
|      | 4.12 | 1.77  | 4.13  | 1.75 | 9.92 | 5.45  |
|      | 4.45 | 3.97  | 10.02 | 4.07 | 4.27 | 5.49  |
|      | 4.8  | 1.88  | 3.69  | 1.2  | 5.55 | 4.82  |
|      | 2.63 | 2.8   | 3.79  | 3.21 | 3.01 | 7.57  |
|      | 3.88 | 1.81  | 1.71  | 2.89 | 3.9  | 7.34  |
|      | 2.38 | 3.8   | 6.86  | 3.8  | 5    | 4.36  |
|      | 7.28 | 1.36  | 5.38  | 1.21 | 3.56 | 8.25  |
|      | 0.91 | 1.65  | 3.4   | 1.44 | 4.46 | 3.48  |
|      | 1.1  | 2.15  | 3.19  | 2.07 | 5.26 | 3.63  |
|      | 1.03 | 2.16  | 2.26  | 2.81 | 3.91 | 2.52  |
|      | 1.29 | 3.33  | 3.49  | 0.85 | 1.47 | 4.12  |
|      | 2.63 | 3.32  | 2.67  | 2.08 | 3.72 | 1.77  |
|      | 2.27 | 2.53  | 2.17  | 2.61 | 6.49 | 0.66  |
|      | 2.55 | 2.29  | 2.55  | 0.54 | 2.73 | 6.89  |
|      | 2.75 | 3.72  | 1.84  | 5.54 | 4.62 | 3.91  |
|      | 3.59 | 3.12  | 2.56  | 2    | 8.92 | 2.74  |
|      |      | 2.43  | 2.15  | 2.5  | 2.7  | 2.17  |
|      |      | 3.5   | 4.38  | 3.59 | 6.19 |       |
|      |      | 11.87 | 3.31  | 3.3  | 3.7  |       |
|      |      | 7.81  | 1.02  | 3.44 | 4.74 |       |
|      |      | 2.9   | 5.71  | 5.78 | 5.24 |       |
|      |      |       | 4.77  | 4.42 | 4.09 |       |
|      |      |       | 3.39  | 3.87 | 7.14 |       |
|      |      |       | 2.85  | 4.8  | 6.6  |       |
|      |      |       | 3.54  | 4.21 | 1.69 |       |
|      |      |       | 2.47  | 4.74 | 5.86 |       |
|      |      |       | 3.28  | 1.48 | 3.91 |       |
|      |      |       | 2.51  | 3.06 |      |       |
|      |      |       | 4.48  |      |      |       |
|      |      |       | 4.84  |      |      |       |
|      |      |       | 6.03  |      |      |       |
|      |      |       |       |      |      |       |
|      |      |       |       |      |      |       |

|             |             |             |             |             |             |             |
|-------------|-------------|-------------|-------------|-------------|-------------|-------------|
|             |             |             |             |             |             |             |
|             |             |             |             |             |             |             |
|             |             |             |             |             |             |             |
|             |             |             |             |             |             |             |
|             |             |             |             |             |             |             |
|             |             |             |             |             |             |             |
|             |             |             |             |             |             |             |
|             |             |             |             |             |             |             |
|             |             |             |             |             |             |             |
|             |             |             |             |             |             |             |
| dCBD_2_4    | dCBD_2_5    | dCBD_2_6    | dCBD_2_7    | dCBD_2_8    | dCBD_2_9    | dCBD_2_10   |
| Length (um) | Length (um) | Length (um) | Length (um) | Length (um) | Length (um) | Length (um) |
| 1.09        | 4.28        | 1.6         | 9.89        | 2.28        | 1.41        | 1.61        |
| 3.51        | 4.21        | 4.49        | 7.35        | 3.98        | 1.67        | 1.93        |
| 3.95        | 2.94        | 3.78        | 4.95        | 3.68        | 1.13        | 12          |
| 1.23        | 5.03        | 6.88        | 5.11        | 2.62        | 3.49        | 3.09        |
| 1.7         | 7.45        | 2.03        | 8.53        | 2.83        | 3.5         | 2.18        |
| 2.93        | 1.62        | 2.39        | 5.52        | 4.23        | 3.32        | 2.5         |
| 6.76        | 6.77        | 6.81        | 6.34        | 3.21        | 2.99        | 1.4         |
| 2.56        | 10.89       | 5.43        | 10.44       | 3.5         | 2.92        | 1.52        |
| 5.89        | 5.03        | 5.68        | 7.72        | 3.48        | 5.34        | 1.52        |
| 6.53        | 6.29        | 7.38        | 3.53        | 1.63        | 12.64       | 1.92        |
| 6           | 2.45        | 9.04        | 3.7         | 3.38        | 1.88        | 2.77        |
| 8.11        | 3.95        | 6.05        | 1.45        | 4.08        | 12.47       | 7.82        |
| 6.38        | 4.76        | 11.64       | 1.29        | 3.89        | 2.46        | 1.55        |
| 1.65        | 2.1         | 9.87        | 2.51        | 4.42        | 3.29        | 1.56        |
| 3.05        | 2.81        | 4.9         | 1.61        | 3.65        | 2.68        | 1.99        |
| 4.03        | 5           | 4.13        | 2.84        | 1.77        | 0.88        | 1.96        |
| 4.88        | 2.64        | 8.44        | 0.89        | 3.1         | 1.18        | 3.06        |
| 3.87        | 0.8         | 9.41        | 4.31        | 2           | 1.4         | 3.14        |
| 5.53        | 2.06        | 2.4         | 1.39        | 3.18        | 2.58        | 3.91        |
| 5.06        | 4.14        | 3.82        | 3.97        | 3.73        | 2.27        | 4.03        |
| 5.45        | 2.71        | 3.5         | 1.76        | 9.47        | 2.12        | 4.67        |
| 4.15        | 2.34        | 2.7         | 1.6         | 2.4         | 3.28        | 4.9         |
| 1.55        | 1.77        | 6.5         | 1.52        | 2.77        | 2.42        | 3.25        |
| 2.23        | 2.89        | 4.02        | 1.68        | 6.5         | 3.14        | 2.99        |
| 1.29        | 2.48        | 3.07        | 3.04        | 7.5         | 2.46        | 2.86        |
| 1.12        | 1.27        | 1.5         | 1.71        | 6.77        | 2.4         | 1.85        |
| 0.51        | 3.2         | 3.38        | 1.91        | 2.5         | 2.83        | 6.73        |
| 2.2         | 6.4         | 1.69        | 1.49        | 2.65        | 2.27        | 4.81        |
| 3           | 4.53        | 1.3         | 1.05        | 5.41        | 1.99        | 6.5         |
| 2.34        | 3.5         | 2.27        | 1.19        | 5.25        | 2.58        | 2.77        |
|             | 3.3         | 2.52        | 1.54        | 5.97        | 1.89        | 5.06        |
|             |             | 2.63        | 1.66        | 2.03        | 2.6         | 5.35        |
|             |             | 1.48        | 0.37        | 1.73        | 1.94        | 4.8         |
|             |             | 3.22        | 1.11        | 0.92        | 1.71        | 5.84        |



|             |             |             |             |             |             |             |
|-------------|-------------|-------------|-------------|-------------|-------------|-------------|
|             |             |             |             |             |             |             |
|             |             |             |             |             |             |             |
|             |             |             |             |             |             |             |
|             |             |             |             |             |             |             |
|             |             |             |             |             |             |             |
|             |             |             |             |             |             |             |
|             |             |             |             |             |             |             |
|             |             |             |             |             |             |             |
|             |             |             |             |             |             |             |
|             |             |             |             |             |             |             |
|             |             |             |             |             |             |             |
|             |             |             |             |             |             |             |
|             |             |             |             |             |             |             |
|             |             |             |             |             |             |             |
|             |             |             |             |             |             |             |
|             |             |             |             |             |             |             |
|             |             |             |             |             |             |             |
|             |             |             |             |             |             |             |
|             |             |             |             |             |             |             |
|             |             |             |             |             |             |             |
|             |             |             |             |             |             |             |
|             |             |             |             |             |             |             |
|             |             |             |             |             |             |             |
| FL_3_1      | FL_3_2      | FL_3_3      | FL_3_4      | FL_3_5      | FL_3_6      | FL_3_7      |
| Length (um) | Length (um) | Length (um) | Length (um) | Length (um) | Length (um) | Length (um) |
| 3.59        | 1.9         | 1.67        | 2.55        | 3.3         | 9.78        | 5.82        |
| 3.74        | 1.73        | 1.52        | 2.42        | 3.03        | 1.77        | 3.42        |
| 2.49        | 0.78        | 0.69        | 5.38        | 3.57        | 4.06        | 5           |
| 3.63        | 1.57        | 1.08        | 6.58        | 2.77        | 3.16        | 2.03        |
| 3.83        | 1.11        | 2.66        | 5.89        | 6.47        | 1.82        | 5.14        |
| 3.26        | 2.14        | 2.66        | 2.85        | 5.66        | 2.74        | 1.7         |
| 3.46        | 0.65        | 1.26        | 4.1         | 2.32        | 2.93        | 8.29        |
| 8.88        | 2.13        | 0.77        | 1.05        | 4.68        | 1.94        | 3.95        |
| 5.68        | 0.64        | 2.9         | 5.51        | 5.73        | 2.23        | 5.95        |
| 7.17        | 2.02        | 2.11        | 0.88        | 6.8         | 1.61        | 3.15        |
| 7.82        | 2.97        | 2.06        | 1.26        | 2.42        | 4.1         | 3.49        |
| 11          | 4.65        | 2.58        | 2.42        | 5.59        | 5.22        | 3.78        |
| 2.34        | 2.04        | 2.21        | 3.26        | 5.96        | 1.77        | 2.45        |
| 2.78        | 2.31        | 2.5         | 2.61        | 7.62        | 2.34        | 2.74        |
| 9.26        | 2.07        | 2.23        | 5.21        | 7.08        | 2.83        | 2.9         |
| 2.96        | 2.89        | 0.89        | 3.32        | 8.09        | 1.42        | 2.98        |
| 5.61        | 0.82        | 1.52        | 6.54        | 14.44       | 2.07        | 3.7         |
| 3.02        | 1.82        | 0.8         | 2.81        | 4.27        | 3.3         | 4.3         |
| 3.28        | 1.87        | 1.7         | 5.15        | 7.74        | 2.41        | 5.51        |
| 6.6         | 4.14        | 1.64        | 4.11        | 1.79        | 2.55        | 3.41        |
| 2.63        | 1.82        | 1.12        | 3.72        | 4.95        | 2.4         | 4.01        |
| 7.16        | 1.64        | 1.78        | 10.42       | 2.02        | 3.82        | 2.69        |
| 7.31        | 1.97        | 0.72        | 3.32        | 4.04        | 3.45        | 5.41        |
| 8.97        | 2.56        | 2.39        | 7.46        | 2.44        | 3.17        | 4.88        |
| 3.14        | 2.56        |             | 9.27        | 3.48        | 1.61        | 6.36        |

|       |      |  |       |      |       |  |
|-------|------|--|-------|------|-------|--|
| 7.19  | 5.08 |  | 2.16  | 4.66 | 10.06 |  |
| 7.18  | 1.64 |  | 5.21  | 3.1  |       |  |
| 8.81  | 2.11 |  | 2.85  | 2.44 |       |  |
| 10.72 | 1.13 |  | 2.87  | 0.8  |       |  |
| 5.58  | 3.38 |  | 13.03 | 2.81 |       |  |
| 3.68  | 2.66 |  | 4.78  | 3.5  |       |  |
| 4.12  | 5.28 |  | 4.18  | 1.9  |       |  |
| 3.8   | 1.26 |  | 0.86  | 2.29 |       |  |
| 4.84  | 3.08 |  |       | 1.46 |       |  |
| 5.73  | 1.21 |  |       | 1.87 |       |  |
| 10.89 | 2.87 |  |       | 2.13 |       |  |
| 3.86  | 3.99 |  |       | 7.23 |       |  |
| 6.44  | 5.31 |  |       | 6.9  |       |  |
| 7.55  | 2.86 |  |       | 1.64 |       |  |
| 5.14  | 2.87 |  |       | 4.22 |       |  |
| 4.58  |      |  |       | 3.26 |       |  |
| 6.4   |      |  |       | 1.79 |       |  |
| 6.85  |      |  |       | 7.74 |       |  |
| 6.91  |      |  |       |      |       |  |
| 4.3   |      |  |       |      |       |  |
| 3.85  |      |  |       |      |       |  |
| 4.62  |      |  |       |      |       |  |
| 2.09  |      |  |       |      |       |  |
| 1.48  |      |  |       |      |       |  |
| 1.48  |      |  |       |      |       |  |
| 1.45  |      |  |       |      |       |  |
| 3.67  |      |  |       |      |       |  |
| 2.09  |      |  |       |      |       |  |
| 1.6   |      |  |       |      |       |  |
| 1.35  |      |  |       |      |       |  |
| 2.78  |      |  |       |      |       |  |
| 1.89  |      |  |       |      |       |  |
| 2.31  |      |  |       |      |       |  |
| 1.81  |      |  |       |      |       |  |
| 3.65  |      |  |       |      |       |  |
| 0.55  |      |  |       |      |       |  |
| 2.31  |      |  |       |      |       |  |
| 1.6   |      |  |       |      |       |  |
| 1.21  |      |  |       |      |       |  |
| 3.01  |      |  |       |      |       |  |
| 1.31  |      |  |       |      |       |  |
| 2.05  |      |  |       |      |       |  |
| 2.89  |      |  |       |      |       |  |
| 2.09  |      |  |       |      |       |  |
| 1.83  |      |  |       |      |       |  |
|       |      |  |       |      |       |  |
|       |      |  |       |      |       |  |

| dCBD_3_1    | dCBD_3_2    | dCBD_3_3    | dCBD_3_4    | dCBD_3_5    | dCBD_3_6    | dCBD_3_7    |
|-------------|-------------|-------------|-------------|-------------|-------------|-------------|
| Length (um) | Length (um) | Length (um) | Length (um) | Length (um) | Length (um) | Length (um) |
| 0.98        | 1.52        | 1.5         | 0.78        | 2.6         | 1.08        | 2.43        |
| 2.03        | 1.07        | 1.59        | 1.52        | 4.2         | 0.36        | 1.58        |
| 1.07        | 1.3         | 0.98        | 1.95        | 2.79        | 0.85        | 2.5         |
| 1.68        | 0.88        | 0.16        | 2.7         | 2.65        | 0.97        | 3.58        |
| 1.4         | 0.74        | 0.63        | 2.31        | 5.09        | 1.16        | 3.37        |
| 1.12        | 1.38        | 1.4         | 1.24        | 4.34        | 1.06        | 1.15        |
| 0.16        | 1.1         | 1.48        | 1.85        | 1.77        | 0.87        | 8           |
| 2.79        | 1.22        | 1.54        | 1.99        | 0.97        | 1.73        | 9.13        |
| 2.89        | 2.26        | 1.5         | 1.68        | 1.2         | 1.24        | 2.2         |
| 4.6         | 1.66        | 0.92        | 1.69        | 0.82        | 2.14        | 1.06        |
| 2.75        | 1.97        | 1.56        | 2.7         | 0.43        | 0.69        | 2.22        |
| 1.53        | 2.54        | 1.34        | 1.66        | 2.22        | 1.06        | 2.35        |
| 1.68        | 1.13        | 1.13        | 1.64        | 1.24        | 0.62        | 5.76        |
| 3.86        | 1.8         | 0.64        | 1.53        | 3.75        | 2.65        | 4.39        |
| 3.2         | 1.22        | 1.06        | 1.47        | 0.51        | 1.22        | 1.12        |
| 4.2         | 7.26        | 1.44        | 0.75        | 0.58        | 1.02        | 2.12        |
| 2.79        | 3.44        | 0.98        | 0.65        | 5.63        | 2.48        | 1.04        |
| 5.18        | 0.85        | 0.94        | 0.51        | 0.77        | 1.16        | 1.31        |
| 3.81        | 3.93        | 1.51        | 2.28        | 1.15        | 2.28        | 2.77        |
| 5.43        | 5.41        | 1.25        | 1.27        | 4.84        | 2.18        | 1.33        |
| 3           | 3.5         | 3.26        | 3.68        | 4.04        | 1.48        | 4.63        |
| 3.93        | 7           | 2.2         | 2.43        | 2.14        | 0.71        | 3.55        |
| 1.53        | 2.48        | 2.61        | 0.98        | 1.62        | 0.51        | 0.88        |
| 1.68        | 2.11        | 2.32        | 1.87        | 2.27        | 1.73        | 1.04        |
|             | 1.61        | 3.53        | 0.72        | 0.99        | 2.37        | 0.78        |
|             | 1.02        | 3.14        | 1.71        | 0.84        | 2.32        | 3.49        |
|             | 0.69        | 3.76        | 0.96        | 1.52        | 2.99        | 1.31        |
|             | 0.77        | 1.03        | 0.72        | 0.79        | 2.96        | 2.77        |
|             | 1.2         | 3.32        | 1.41        | 0.66        | 5.05        | 1.33        |
|             | 2.24        | 1.28        | 0.84        | 0.68        | 12.76       | 3.49        |
|             | 1.02        | 1.8         | 10.5        | 0.73        | 3.38        | 2.72        |
|             |             | 1.1         | 1.24        | 0.58        | 5.06        | 4.64        |
|             |             | 1.99        | 1.15        | 0.67        | 5.85        | 1.15        |
|             |             | 1.43        | 0.51        | 0.67        | 5.93        | 2.65        |





|             |             |             |
|-------------|-------------|-------------|
|             |             |             |
|             |             |             |
|             |             |             |
|             |             |             |
|             |             |             |
|             |             |             |
|             |             |             |
|             |             |             |
|             |             |             |
|             |             |             |
|             |             |             |
|             |             |             |
|             |             |             |
|             |             |             |
|             |             |             |
|             |             |             |
|             |             |             |
|             |             |             |
|             |             |             |
|             |             |             |
|             |             |             |
| FL_3_8      | FL_3_9      | FL_3_10     |
| Length (um) | Length (um) | Length (um) |
| 1.97        | 3.65        | 2.14        |
| 3.81        | 4.28        | 1.62        |
| 5.85        | 4.07        | 2.35        |
| 3.98        | 2.46        | 1.11        |
| 6.64        | 7.1         | 1.58        |
| 4.38        | 2.98        | 4.22        |
| 3.05        | 9.48        | 0.69        |
| 1.62        | 4.49        | 13.17       |
| 4.06        | 2.1         | 7.39        |
| 6.63        | 4.32        | 11.53       |
| 4.56        | 10.16       | 9.33        |
| 4.83        | 17.57       | 11.81       |
| 5.5         | 11.94       | 9.38        |
| 8.27        | 7.45        | 9.99        |
| 6.91        | 3.79        | 4.48        |
| 8.06        | 5.72        | 3.6         |
| 8.81        | 8.79        | 3.63        |
| 11.57       | 18.51       | 2.63        |
| 10.72       | 6.15        | 0.91        |
| 8.88        | 4.81        | 1.17        |
| 5.65        | 2.5         | 0.92        |
| 3.72        | 2.1         | 3.38        |
| 9.28        | 2.58        | 1.61        |
| 6.63        | 6.59        | 1.95        |
| 5.68        | 3.88        | 2.55        |



|             |             |             |
|-------------|-------------|-------------|
|             |             |             |
|             |             |             |
|             |             |             |
|             |             |             |
|             |             |             |
|             |             |             |
|             |             |             |
|             |             |             |
|             |             |             |
|             |             |             |
| dCBD_3_8    | dCBD_3_9    | dCBD_3_10   |
| Length (um) | Length (um) | Length (um) |
| 2.23        | 3.57        | 1.05        |
| 1.63        | 1.37        | 0.78        |
| 1.05        | 0.81        | 1.89        |
| 0.66        | 2.32        | 0.92        |
| 3.66        | 3.6         | 0.76        |
| 4.39        | 4.61        | 0.88        |
| 2.04        | 5.9         | 0.64        |
| 1.89        | 2           | 0.78        |
| 2.8         | 4.48        | 0.67        |
| 3.09        | 3.44        | 0.88        |
| 3.46        | 8.85        | 1.72        |
| 1.67        | 11.92       | 1.22        |
| 2.06        | 5.38        | 1.24        |
| 1.27        | 5.9         | 0.77        |
| 1.31        | 6.01        | 1.72        |
| 3.03        | 2.77        | 0.83        |
| 1.2         | 5.26        | 4.94        |
| 0.7         | 3.33        | 6.17        |
| 0.49        | 13.46       | 1.99        |
| 2.18        | 4           | 1.43        |
| 1.65        | 5.77        | 1.47        |
| 1.54        | 5.55        | 4.66        |
| 1.83        | 4.56        | 4.72        |
| 1.6         | 5.61        | 1.34        |
| 1.69        | 5.86        | 0.59        |
| 1.51        | 5.5         | 1.33        |
| 4.29        | 5.29        | 4.66        |
| 3.75        | 6.96        | 0.68        |
| 3.78        | 5.51        | 2.4         |
| 12.3        | 9.76        | 2           |
| 5.92        | 2.41        | 1.79        |
| 3.02        | 3.69        | 1.65        |
| 1.31        | 6           | 2.4         |
| 1.69        | 6.52        | 3.75        |

|       |      |      |
|-------|------|------|
| 1.52  | 6.61 | 3.74 |
| 1.51  | 1.66 | 4.29 |
| 2.54  | 0.68 | 1.63 |
| 2.6   | 0.96 | 2.82 |
| 1.05  | 2.15 | 3.19 |
| 2.33  | 0.58 | 2.23 |
| 1.13  | 1.03 | 3.24 |
| 2.2   | 0.71 | 1.82 |
| 0.74  | 2.38 | 2.87 |
| 1.81  | 5.94 | 2.05 |
| 10.61 | 2.18 | 5.54 |
| 2.23  | 1.14 | 0.44 |
| 2.04  | 2.74 | 6.51 |
| 5.34  | 1.58 | 5.92 |
| 1.73  | 2.97 | 3.03 |
| 0.36  | 2.69 | 1.84 |
| 1.87  | 1.81 | 2.65 |
| 0.15  | 1.21 | 0.75 |
| 2.56  | 2.84 | 1.52 |
| 2.33  | 2.61 | 1.1  |
|       | 1.47 | 1.68 |
|       | 3.83 | 1.05 |
|       | 0.42 | 0.78 |
|       | 1.43 | 0.92 |
|       | 2.13 |      |
|       | 2.02 |      |
|       | 1.45 |      |
|       | 2.77 |      |
