# Supplementary material for: Filopodia powered by class x myosin promote fusion of mammalian myoblasts
Source: eLife journal article supplement (doi:10.7554/elife.72419), 2021-09-14
Supplement: fig4-figsupp2-data1 [file elife-72419-fig4-figsupp2-data1-v2.pdf]

| <b>Fig S6B- Muscle mass recovery from freeze injury</b> |                |                    |
|---------------------------------------------------------|----------------|--------------------|
| <b>Muscle Sample#</b>                                   | <b>Pax7-WT</b> | <b>Pax7-M10cKO</b> |
| 1                                                       | 100.1745201    | 55.74162679        |
| 2                                                       | 93.22344322    | 67.04545455        |
| 3                                                       | 91.66666667    | 70.72649573        |
| 4                                                       | 80.81632653    | 84.01559454        |
| 5                                                       | 74.53798768    | 57.84543326        |
| 6                                                       |                | 85.77586207        |
| 7                                                       |                | 62.31578947        |
| 8                                                       |                | 69.96904025        |
